# Supplementary material for: A Ferroptosis-associated Gene Signature for the Prediction of Prognosis and Therapeutic Response in Luminal-type Breast Carcinoma
Source: Research Square preprint supplement (doi:10.21203/rs.3.rs-125141/v1), 2020-12-12
Supplement: Supplementary file 2 [file 7fe9c42c97d49021a4593fd7.csv]

gistic scores data of low risk subgroup
	Variant_Classification	Chromosome	Start_Position	End_Position	fdr	G_Score	Avg_amplitude	frequency
1	Amp	1	3302046	3309193	0	0.008779	0.36497	0.02253
2	Amp	1	3309649	3345118	0	0.007464	0.370242	0.020797
3	Amp	1	3350785	3854784	0	0.006833	0.390743	0.019064
4	Amp	1	3854839	3885264	0	0.008784	0.395485	0.020797
5	Amp	1	3885647	4009627	0	0.007413	0.402833	0.019064
6	Amp	1	4013004	4018674	0	0.008091	0.454936	0.020797
7	Amp	1	4018716	4364085	0	0.00614	0.455598	0.019064
8	Amp	1	4365703	4652424	0	0.009927	0.534586	0.019064
9	Amp	1	4657280	5034643	0	0.008402	0.549262	0.017331
10	Amp	1	5037294	5042084	0	0.00761	0.584812	0.015598
11	Amp	1	5119746	5710205	0	0.003823	0.484951	0.015598
12	Amp	1	5712931	5742609	0	0.00529	0.470118	0.017331
13	Amp	1	5743560	6300087	0	0.003823	0.484951	0.015598
14	Amp	1	6304311	6335675	0	0.00725	0.566	0.015598
15	Amp	1	6339720	6548126	0	0.004105	0.536441	0.013865
16	Amp	1	6551233	6676330	0	0.005157	0.506313	0.015598
17	Amp	1	6676739	6768567	0	0.008977	0.544028	0.017331
18	Amp	1	6768948	6976742	0	0.011105	0.546313	0.019064
19	Amp	1	6978351	6987540	0	0.007286	0.512598	0.017331
20	Amp	1	6990595	7040405	0	0.006234	0.540077	0.015598
21	Amp	1	7040695	7303250	0	0.004679	0.500424	0.015598
22	Amp	1	7303593	7539272	0	0.007659	0.519474	0.017331
23	Amp	1	7539353	7843170	0	0.009135	0.553345	0.017331
24	Amp	1	7845814	8039643	0	0.006155	0.538059	0.015598
25	Amp	1	8040080	8104440	0	0.005477	0.476807	0.013865
26	Amp	1	8105340	8223057	0	0.006094	0.43958	0.015598
27	Amp	1	8224597	8379997	0	0.005477	0.476807	0.013865
28	Amp	1	8380230	8554218	0	0.003348	0.463613	0.012132
29	Amp	1	8559375	8630844	0	0.001872	0.405146	0.012132
30	Amp	1	8658852	8800155	0	0.003867	0.411713	0.013865
31	Amp	1	8803019	9078959	0	0.006058	0.419636	0.015598
32	Amp	1	9080019	9137402	0	0.005514	0.405765	0.015598
33	Amp	1	9140655	9419510	0	0.00352	0.399275	0.013865
34	Amp	1	9423147	9929146	0	0.002192	0.412781	0.012132
35	Amp	1	9933962	10228739	0	0	0.390705	0.010399
36	Amp	1	10229443	10285267	0	0.001927	0.407925	0.012132
37	Amp	1	10285328	10748530	0	0.004324	0.486521	0.012132
38	Amp	1	10763717	10886195	0	0	0.390705	0.010399
39	Amp	1	10890669	10935422	0	0.001475	0.383228	0.012132
40	Amp	1	10939437	10970785	0	0	0.390705	0.010399
41	Amp	1	10972283	11386853	0	0.004347	0.484737	0.012132
42	Amp	1	11389688	11474485	0	0.004995	0.439042	0.012132
43	Amp	1	11483287	11769360	0	0.004347	0.490604	0.008666
44	Amp	1	11769634	11819195	0	0.006709	0.503045	0.010399
45	Amp	1	11819210	12087665	0	0.009718	0.529831	0.012132
46	Amp	1	12093131	12132249	0	0.007356	0.523928	0.010399
47	Amp	1	12134394	12163425	0	0.008006	0.470379	0.012132
48	Amp	1	12165294	12335732	0	0.007356	0.523928	0.010399
49	Amp	1	12340039	12485724	0	0.004347	0.490604	0.008666
50	Amp	1	12486639	12765430	0	0.006491	0.502335	0.010399
51	Amp	1	12765866	12774437	0	0.009216	0.622449	0.012132
52	Amp	1	13468357	13475857	0	0.004869	0.518927	0.008666
53	Amp	1	13475969	14736130	0	0.006096	0.479387	0.010399
54	Amp	1	14737886	14823391	0	0.005624	0.53993	0.008666
55	Amp	1	14826259	15236684	0	0.009142	0.585666	0.010399
56	Amp	1	15237219	15252949	0	0.006889	0.49949	0.010399
57	Amp	1	15253283	15770261	0	0.004746	0.486338	0.008666
58	Amp	1	15772497	15956281	0	0.001228	0.404335	0.006932
59	Amp	1	15960576	16108232	0	0.004153	0.45775	0.008666
60	Amp	1	16110276	16192971	0	0.006774	0.438053	0.012132
61	Amp	1	16193529	16328359	0	0.004153	0.404468	0.010399
62	Amp	1	16328513	17003654	0	0.001228	0.35108	0.008666
63	Amp	1	17010382	17236303	0	0.002711	0.352693	0.010399
64	Amp	1	17238352	17308916	0	0.005068	0.379561	0.012132
65	Amp	1	17309517	17351414	0	0.003584	0.382694	0.010399
66	Amp	1	17353180	17422711	0	0.005568	0.393578	0.012132
67	Amp	1	17423008	17437538	0	0.003584	0.382694	0.010399
68	Amp	1	17440184	17510199	0	0.002357	0.402896	0.008666
69	Amp	1	17511109	17955601	0	0.003519	0.380199	0.010399
70	Amp	1	17958313	18009739	0	0.004592	0.332203	0.013865
71	Amp	1	18010409	18013041	0	0.00343	0.341559	0.012132
72	Amp	1	18013254	18026804	0	0.002357	0.356393	0.010399
73	Amp	1	18027107	18040192	0	0.003926	0.356911	0.012132
74	Amp	1	18042940	18363113	0	0.002357	0.356393	0.010399
75	Amp	1	18364119	18371262	0	0.006141	0.42953	0.012132
76	Amp	1	18373518	18860632	0	0.002357	0.356393	0.010399
77	Amp	1	18860749	19082156	0	0.003471	0.342014	0.012132
78	Amp	1	19085006	19175207	0	0.007373	0.415766	0.013865
79	Amp	1	19186019	19311815	0	0.009325	0.419328	0.015598
80	Amp	1	19314095	19354064	0	0.005423	0.35524	0.013865
81	Amp	1	19362686	19509072	0	0.003471	0.312034	0.013865
82	Amp	1	19512645	19517189	0	0.004825	0.30861	0.015598
83	Amp	1	19524537	19605393	0	0.007226	0.334398	0.017331
84	Amp	1	19606106	19847365	0	0.008853	0.366263	0.017331
85	Amp	1	19848619	20144986	0	0.007499	0.397445	0.013865
86	Amp	1	20147121	20252075	0	0.005142	0.37697	0.012132
87	Amp	1	20255925	20584798	0	0.003515	0.36966	0.010399
88	Amp	1	20584911	20712487	0	0.005591	0.437751	0.012132
89	Amp	1	20713658	20799917	0	0.008082	0.519394	0.012132
90	Amp	1	20801444	21358952	0	0.005591	0.430949	0.012132
91	Amp	1	21361264	21610416	0	0.012953	0.589123	0.013865
92	Amp	1	21610824	21627289	0	0.015258	0.588785	0.015598
93	Amp	1	21629815	21684282	0	0.018852	0.680435	0.015598
94	Amp	1	21685618	21712494	0	0.017044	0.634315	0.015598
95	Amp	1	21715388	21956126	0	0.015929	0.681637	0.013865
96	Amp	1	21961373	22292849	0	0.016865	0.62977	0.015598
97	Amp	1	22302695	22343478	0	0.014143	0.623281	0.013865
98	Amp	1	22345985	22513347	0	0.011838	0.63675	0.012132
99	Amp	1	22516935	22659910	0	0.007362	0.569075	0.010399
100	Amp	1	22660245	22675602	0	0.008079	0.511721	0.012132
101	Amp	1	22675966	22688154	0	0.000718	0.314284	0.010399
102	Amp	1	22689915	22755454	0	0	0.34362	0.008666
103	Amp	1	22755626	22957443	0	0.002458	0.382311	0.010399
104	Amp	1	22959794	23241646	0	0	0.34362	0.008666
105	Amp	1	23244756	23330212	0	0.004275	0.387902	0.012132
106	Amp	1	23333862	23334629	0	0.002403	0.378254	0.010399
107	Amp	1	23335566	23367528	0	0.001204	0.332403	0.010399
108	Amp	1	23372022	23757290	0	0	0.34362	0.008666
109	Amp	1	23763907	24078925	0	0.001625	0.3492	0.010399
110	Amp	1	24080157	24219708	0	0.007429	0.495045	0.012132
111	Amp	1	24226054	24357626	0	0.010225	0.513362	0.013865
112	Amp	1	24359705	24390399	0	0.01283	0.526471	0.015598
113	Amp	1	24402139	24477614	0	0.015745	0.540724	0.017331
114	Amp	1	24483579	24492891	0	0.024858	0.738159	0.017331
115	Amp	1	24495534	24619164	0	0.022253	0.750027	0.015598
116	Amp	1	24620695	24641799	0	0.034947	0.967721	0.017331
117	Amp	1	24644578	24727732	0	0.037084	0.924316	0.019064
118	Amp	1	24732886	24769293	0	0.033002	0.839164	0.019064
119	Amp	1	24771301	24808610	0	0.034908	0.878918	0.019064
120	Amp	1	24809796	24860251	0	0.032771	0.917783	0.017331
121	Amp	1	24864144	24913549	0	0.020077	0.69454	0.015598
122	Amp	1	24924549	25111459	0	0.017162	0.697733	0.013865
123	Amp	1	25115233	25118529	0	0.015537	0.743538	0.012132
124	Amp	1	25139359	25396759	0	0.006424	0.517756	0.010399
125	Amp	1	25407761	25447591	0	0.003767	0.416132	0.010399
126	Amp	1	25562931	25665036	0	0.012364	0.640817	0.012132
127	Amp	1	25669445	25792419	0	0.016388	0.782467	0.012132
128	Amp	1	25802876	25806536	0	0.017978	0.730275	0.013865
129	Amp	1	25808435	25929240	0	0.019301	0.682868	0.015598
130	Amp	1	25932053	26010018	0	0.015277	0.580279	0.015598
131	Amp	1	26016621	26024891	0	0.013687	0.607197	0.013865
132	Amp	1	26029149	26087048	0	0.012364	0.650566	0.012132
133	Amp	1	26089054	26223723	0	0.010642	0.675379	0.010399
134	Amp	1	26233560	26324641	0	0.012693	0.646134	0.012132
135	Amp	1	26325696	26363446	0	0.014962	0.674461	0.012132
136	Amp	1	26365559	26439753	0	0.012911	0.708426	0.010399
137	Amp	1	26442084	26546754	0	0.010642	0.74598	0.008666
138	Amp	1	26549798	26728338	0	0.008597	0.815194	0.006932
139	Amp	1	26730873	26762777	0	0	0.42395	0.005199
140	Amp	1	26763075	26894366	0	0.003619	0.52556	0.006932
141	Amp	1	26896264	27014714	0	0.00633	0.545806	0.008666
142	Amp	1	27020298	27022452	0	0.008777	0.663493	0.008666
143	Amp	1	27072223	27194374	0	0.006066	0.672669	0.006932
144	Amp	1	27195013	28035717	0	0.003619	0.532262	0.006932
145	Amp	1	28036116	28045064	0	0.007156	0.594759	0.008666
146	Amp	1	28045835	28186296	0	0.003538	0.529149	0.006932
147	Amp	1	28188781	28665596	0	0	0.42395	0.005199
148	Amp	1	28681156	28723213	0	0.001711	0.432112	0.008666
149	Amp	1	28728193	29253314	0	0.008228	0.737595	0.008666
150	Amp	1	29254639	29379511	0	0.001711	0.371737	0.012132
151	Amp	1	29382391	29392963	0	0.002546	0.363741	0.013865
152	Amp	1	29400160	29710292	0	0.003032	0.337143	0.015598
153	Amp	1	29711579	29717700	0	0.00506	0.349965	0.017331
154	Amp	1	29717809	29732145	0	0.004574	0.375032	0.015598
155	Amp	1	29733944	29742865	0	0.005504	0.358874	0.017331
156	Amp	1	29745789	29827758	0	0.004574	0.375032	0.015598
157	Amp	1	29828461	29914856	0	0.005023	0.389383	0.015598
158	Amp	1	29920040	30059743	0	0.016998	0.628275	0.017331
159	Amp	1	30059821	30177377	0	0.012883	0.533858	0.017331
160	Amp	1	30181334	30193293	0	0.013987	0.514793	0.019064
161	Amp	1	30193910	30205430	0	0.007621	0.381976	0.019064
162	Amp	1	30219475	30234444	0	0.009776	0.392661	0.020797
163	Amp	1	30238008	30277832	0	0.007621	0.381976	0.019064
164	Amp	1	30281677	30444352	0	0.018427	0.538642	0.02253
165	Amp	1	30445319	30538779	0	0.007621	0.376888	0.020797
166	Amp	1	30540928	30542027	0	0.007172	0.361799	0.020797
167	Amp	1	30542880	30551862	0	0.005144	0.352384	0.019064
168	Amp	1	30552120	30570884	0	0.006975	0.358032	0.020797
169	Amp	1	30572648	30667100	0	0.005144	0.352384	0.019064
170	Amp	1	30789158	30793010	0	0.008249	0.382396	0.020797
171	Amp	1	30794326	30899941	0	0.008829	0.443661	0.02253
172	Amp	1	30903048	30938231	0	0.024765	0.673175	0.024263
173	Amp	1	30940072	30945463	0	0.026296	0.686476	0.025997
174	Amp	1	30947040	31032755	0	0.020739	0.601468	0.025997
175	Amp	1	31033157	31084473	0	0.017634	0.588177	0.024263
176	Amp	1	31085938	31087522	0	0.018313	0.57722	0.025997
177	Amp	1	31091134	31110497	0	0.022634	0.643327	0.025997
178	Amp	1	31120401	31122022	0	0.026753	0.706331	0.025997
179	Amp	1	31126961	31141173	0	0.027849	0.677908	0.02773
180	Amp	1	31143757	31152499	0	0.029153	0.696609	0.02773
181	Amp	1	31152542	31170201	0	0.0309	0.721666	0.02773
182	Amp	1	31175087	31214812	0	0.0285	0.733058	0.025997
183	Amp	1	31216669	31278344	0	0.024381	0.668017	0.025997
184	Amp	1	31283052	31405396	0	0.031837	0.733202	0.02773
185	Amp	1	31407875	31428340	0	0.034186	0.704912	0.031196
186	Amp	1	31428805	31435322	0	0.035946	0.691185	0.032929
187	Amp	1	31436225	31449930	0	0.038433	0.662135	0.036395
188	Amp	1	31454089	31547339	0	0.030976	0.609693	0.034662
189	Amp	1	31550174	31583793	0	0.030141	0.625992	0.032929
190	Amp	1	31588493	31628031	0	0.028648	0.641737	0.031196
191	Amp	1	31628660	31628660	0	0.037236	0.712423	0.032929
192	Amp	1	31632609	31658996	0	0.031742	0.642709	0.032929
193	Amp	1	31663315	31670797	0	0.033584	0.619291	0.036395
194	Amp	1	31673332	31713228	0	0.029982	0.57993	0.036395
195	Amp	1	31719102	31742019	0	0.034135	0.625308	0.036395
196	Amp	1	31747834	31790485	0	0.035861	0.614883	0.038128
197	Amp	1	31800372	31849376	0	0.041149	0.670043	0.038128
198	Amp	1	31849950	31920158	0	0.039388	0.680802	0.036395
199	Amp	1	31923891	31924039	0	0.03704	0.686224	0.034662
200	Amp	1	31926442	31927457	0	0.035197	0.697911	0.032929
201	Amp	1	31929917	32049367	0	0.036317	0.67586	0.034662
202	Amp	1	32051319	32079583	0	0.021785	0.535922	0.032929
203	Amp	1	32079728	32212247	0	0.020059	0.543698	0.031196
204	Amp	1	32219725	32474851	0	0.009785	0.436167	0.029463
205	Amp	1	32475013	32610108	0	0.012354	0.444888	0.031196
206	Amp	1	32613906	32632867	0	0.009785	0.436167	0.029463
207	Amp	1	32638492	32650286	0	0.012389	0.446001	0.031196
208	Amp	1	32653992	32695277	0	0.018406	0.526499	0.031196
209	Amp	1	32697685	32869438	0	0.01592	0.51853	0.029463
210	Amp	1	32877136	32899144	0	0.016657	0.529644	0.029463
211	Amp	1	32905234	32977463	0	0.015537	0.546692	0.02773
212	Amp	1	32978534	32995529	0	0.013433	0.51651	0.02773
213	Amp	1	33000959	33084354	0	0.010828	0.510066	0.025997
214	Amp	1	33086177	33150007	0	0.004811	0.418014	0.025997
215	Amp	1	33152163	33507551	0	0.011839	0.493686	0.02773
216	Amp	1	33510969	33576286	0	0.014127	0.564198	0.025997
217	Amp	1	33576681	33628076	0	0.014588	0.538056	0.02773
218	Amp	1	33631656	33684951	0	0.01717	0.547698	0.029463
219	Amp	1	33685570	33728134	0	0.019978	0.559454	0.031196
220	Amp	1	33729135	33731623	0	0.01717	0.523546	0.031196
221	Amp	1	33732604	33779885	0	0.019309	0.521831	0.032929
222	Amp	1	33780255	33965124	0	0.022401	0.511353	0.036395
223	Amp	1	33965956	34011474	0	0.019309	0.501448	0.034662
224	Amp	1	34011903	34039410	0	0.022331	0.510586	0.036395
225	Amp	1	34039514	34080413	0	0.019284	0.477289	0.036395
226	Amp	1	34085826	34250086	0	0.015303	0.454775	0.034662
227	Amp	1	34250173	34291095	0	0.012721	0.447531	0.032929
228	Amp	1	34294621	34296488	0	0.010145	0.416418	0.032929
229	Amp	1	34304503	34360124	0	0.008005	0.429812	0.029463
230	Amp	1	34362718	34372772	0	0.007269	0.419868	0.029463
231	Amp	1	34373900	34374247	0	0.008493	0.412446	0.031196
232	Amp	1	34374383	34558372	0	0.009061	0.39897	0.032929
233	Amp	1	34559003	34565969	0	0.008493	0.409732	0.031196
234	Amp	1	34572695	34701039	0	0.008032	0.42525	0.029463
235	Amp	1	34705404	34777292	0	0.005744	0.388051	0.029463
236	Amp	1	34779167	34825328	0	0.007861	0.39348	0.031196
237	Amp	1	34830840	34841842	0	0.005744	0.38225	0.029463
238	Amp	1	34842078	34875700	0	0.007916	0.388692	0.031196
239	Amp	1	34875800	34887735	0	0.006691	0.394717	0.029463
240	Amp	1	34889221	34958969	0	0.010997	0.452556	0.031196
241	Amp	1	34961420	35019469	0	0.012604	0.443178	0.032929
242	Amp	1	35023494	35089593	0	0.008299	0.408017	0.031196
243	Amp	1	35091641	35095837	0	0.010508	0.413221	0.032929
244	Amp	1	35096558	35240219	0	0.010062	0.404833	0.032929
245	Amp	1	35241405	35348967	0	0.013947	0.429878	0.034662
246	Amp	1	35349333	35426783	0	0.016896	0.442344	0.036395
247	Amp	1	35427315	35433730	0	0.018201	0.457451	0.036395
248	Amp	1	35435621	35453577	0	0.016594	0.461885	0.034662
249	Amp	1	35453860	35549410	0	0.014521	0.438103	0.034662
250	Amp	1	35549889	35567522	0	0.013842	0.438854	0.032929
251	Amp	1	35575795	35591609	0	0.012029	0.439342	0.031196
252	Amp	1	35602801	35663464	0	0.015861	0.462496	0.032929
253	Amp	1	35677856	35679130	0	0.012029	0.439342	0.031196
254	Amp	1	35684053	35695796	0	0.009858	0.435878	0.029463
255	Amp	1	35697192	35731266	0	0.013023	0.452292	0.031196
256	Amp	1	35734789	35881785	0	0.010075	0.438211	0.029463
257	Amp	1	35892284	35892358	0	0.007866	0.433919	0.02773
258	Amp	1	35895885	36085885	0	0.01459	0.520864	0.029463
259	Amp	1	36086294	36187939	0	0.016545	0.519654	0.031196
260	Amp	1	36189036	36204302	0	0.018887	0.520588	0.032929
261	Amp	1	36212053	36212053	0	0.021372	0.523848	0.034662
262	Amp	1	36213009	36253068	0	0.022108	0.507652	0.036395
263	Amp	1	36256597	36257187	0	0.020803	0.493394	0.036395
264	Amp	1	36257616	36288063	0	0.021938	0.505794	0.036395
265	Amp	1	36288429	36317391	0	0.018461	0.495899	0.034662
266	Amp	1	36321787	36355326	0	0.021684	0.507498	0.036395
267	Amp	1	36360577	36443771	0	0.018461	0.495899	0.034662
268	Amp	1	36443784	36464387	0	0.019211	0.504503	0.034662
269	Amp	1	36464792	36546564	0	0.021812	0.515563	0.036395
270	Amp	1	36553039	36594959	0	0.016828	0.461102	0.036395
271	Amp	1	36598896	36652427	0	0.014227	0.453607	0.034662
272	Amp	1	36654095	36695453	0	0.016642	0.459756	0.036395
273	Amp	1	36703812	36849794	0	0.014227	0.453607	0.034662
274	Amp	1	36851332	36990619	0	0.012272	0.451214	0.032929
275	Amp	1	37003475	37028266	0	0.009787	0.443738	0.031196
276	Amp	1	37037523	37059402	0	0.009052	0.459032	0.029463
277	Amp	1	37059855	37301413	0	0.013141	0.514233	0.029463
278	Amp	1	37305022	37455082	0	0.01143	0.517713	0.02773
279	Amp	1	37455442	37697088	0	0.009971	0.491543	0.02773
280	Amp	1	37697264	37714613	0	0.009156	0.479846	0.02773
281	Amp	1	37723169	37786091	0	0.010964	0.485189	0.02773
282	Amp	1	37787820	37828964	0	0.013723	0.485488	0.031196
283	Amp	1	37834568	37834568	0	0.009634	0.430447	0.031196
284	Amp	1	37837043	37837043	0	0.015762	0.487937	0.032929
285	Amp	1	37837353	37999351	0	0.013954	0.491991	0.031196
286	Amp	1	38003519	38176853	0	0.015032	0.529172	0.029463
287	Amp	1	38179108	38421576	0	0.014518	0.522223	0.029463
288	Amp	1	38421679	38469233	0	0.021419	0.596081	0.031196
289	Amp	1	38470109	38540935	0	0.023132	0.586249	0.032929
290	Amp	1	38544290	38545176	0	0.025077	0.577049	0.036395
291	Amp	1	38546246	38738174	0	0.031189	0.616209	0.038128
292	Amp	1	38740200	38812362	0	0.033533	0.613484	0.039861
293	Amp	1	38813652	38837053	0	0.035277	0.606751	0.041594
294	Amp	1	38844389	38844389	0	0.030511	0.561186	0.041594
295	Amp	1	38845578	38930211	0	0.029761	0.551972	0.041594
296	Amp	1	38930398	39000954	0	0.032863	0.581626	0.041594
297	Amp	1	39001020	39027648	0	0.03115	0.58912	0.039861
298	Amp	1	39029738	39186518	0	0.03278	0.580158	0.041594
299	Amp	1	39192650	39250120	0	0.03515	0.602823	0.041594
300	Amp	1	39252365	39362277	0	0.033406	0.609385	0.039861
301	Amp	1	39372593	39421323	0	0.036054	0.665158	0.038128
302	Amp	1	39422275	39474363	0	0.031951	0.620848	0.038128
303	Amp	1	39474551	39550169	0	0.0282	0.581726	0.038128
304	Amp	1	39557105	39557105	0	0.032074	0.622134	0.038128
305	Amp	1	39559408	39715831	0	0.03412	0.643471	0.038128
306	Amp	1	39717357	39841748	0	0.037901	0.653305	0.039861
307	Amp	1	39842345	39846274	0	0.035855	0.62982	0.039861
308	Amp	1	39848177	39852298	0	0.032074	0.618918	0.038128
309	Amp	1	39863020	39878017	0	0.03511	0.622355	0.039861
310	Amp	1	39880329	39905075	0	0.050316	0.742157	0.041594
311	Amp	1	39912235	39915619	0	0.051949	0.727458	0.043328
312	Amp	1	39915781	39985973	0	0.058997	0.792151	0.043328
313	Amp	1	39989368	39990071	0	0.055686	0.761761	0.043328
314	Amp	1	39993064	40078733	0	0.05359	0.742521	0.043328
315	Amp	1	40080953	40166658	0	0.045765	0.6707	0.043328
316	Amp	1	40170907	40185117	0	0.044253	0.682686	0.041594
317	Amp	1	40186963	40192261	0	0.042623	0.696106	0.039861
318	Amp	1	40197207	40244941	0	0.04508	0.720616	0.039861
319	Amp	1	40245369	40261444	0	0.047176	0.711068	0.041594
320	Amp	1	40263996	40282247	0	0.042749	0.668733	0.041594
321	Amp	1	40284410	40306301	0	0.050598	0.743779	0.041594
322	Amp	1	40306322	40315366	0	0.049493	0.7651	0.039861
323	Amp	1	40329956	40372964	0	0.041041	0.711011	0.038128
324	Amp	1	40406684	40406684	0	0.046485	0.735021	0.039861
325	Amp	1	40406951	40473424	0	0.044028	0.706012	0.039861
326	Amp	1	40474220	40583765	0	0.045794	0.69415	0.041594
327	Amp	1	40584821	40672628	0	0.046575	0.67762	0.043328
328	Amp	1	40673375	40683331	0	0.047315	0.640607	0.046794
329	Amp	1	40688337	40774847	0	0.04971	0.660966	0.046794
330	Amp	1	40780187	40853380	0	0.045968	0.629163	0.046794
331	Amp	1	40856524	40921184	0	0.048328	0.649221	0.046794
332	Amp	1	40921199	40974453	0	0.049866	0.66557	0.046794
333	Amp	1	40976444	40981493	0	0.04683	0.664323	0.045061
334	Amp	1	40981666	41060351	0	0.046091	0.682272	0.043328
335	Amp	1	41060423	41149686	0	0.055392	0.767648	0.043328
336	Amp	1	41149924	41171636	0	0.053032	0.742528	0.043328
337	Amp	1	41173831	41260030	0	0.054198	0.724264	0.045061
338	Amp	1	41263627	41298572	0	0.058149	0.759134	0.045061
339	Amp	1	41300425	41355898	0	0.063775	0.808784	0.045061
340	Amp	1	41356107	41374525	0.040093	0.065636	0.827888	0.045061
341	Amp	1	41374678	41384214	0.089561	0.06777	0.846722	0.045061
342	Amp	1	41384510	41400090	0	0.063038	0.804955	0.045061
343	Amp	1	41409489	41409489	0	0.061871	0.826447	0.043328
344	Amp	1	41412940	41413409	0	0.06001	0.809364	0.043328
345	Amp	1	41414912	41429826	0	0.050025	0.736454	0.041594
346	Amp	1	41433910	41459379	0	0.051777	0.753204	0.041594
347	Amp	1	41460577	41469814	0	0.049643	0.731057	0.041594
348	Amp	1	41470767	41525756	0	0.045074	0.683684	0.041594
349	Amp	1	41526741	41646340	0	0.049278	0.723873	0.041594
350	Amp	1	41648386	41658480	0	0.05001	0.688529	0.043328
351	Amp	1	41660008	41672357	0	0.061	0.75904	0.045061
352	Amp	1	41673505	41680624	0	0.063121	0.777764	0.045061
353	Amp	1	41686813	41742931	0.015369	0.064612	0.763054	0.046794
354	Amp	1	41743418	41746337	0.100827	0.068229	0.793798	0.046794
355	Amp	1	41747405	41747543	0.112543	0.068781	0.770518	0.048527
356	Amp	1	41754953	41928636	0.040093	0.065582	0.7443	0.048527
357	Amp	1	41933851	42000057	0.08435	0.067634	0.761117	0.048527
358	Amp	1	42000098	42052638	0.1237	0.069075	0.772923	0.048527
359	Amp	1	42054202	42077295	0.342649	0.07786	0.815782	0.05026
360	Amp	1	42077787	42217600	0.1237	0.069075	0.772923	0.048527
361	Amp	1	42217613	42230051	0	0.06112	0.70773	0.048527
362	Amp	1	42238452	42260811	0	0.058684	0.712716	0.046794
363	Amp	1	42280304	42348972	0.044794	0.065832	0.746345	0.048527
364	Amp	1	42349503	42444287	0	0.062395	0.718181	0.048527
365	Amp	1	42449380	42454655	0.024438	0.064952	0.713646	0.05026
366	Amp	1	42462922	42462922	0.065715	0.066876	0.704577	0.051993
367	Amp	1	42463059	42491312	0	0.062844	0.673736	0.051993
368	Amp	1	42491666	42495988	0.015369	0.064695	0.666072	0.053726
369	Amp	1	42496550	42496550	0	0.059535	0.627874	0.053726
370	Amp	1	42497099	42680237	0	0.058982	0.644072	0.051993
371	Amp	1	42686905	42689391	0	0.057058	0.651055	0.05026
372	Amp	1	42692839	42749604	0	0.058954	0.666057	0.05026
373	Amp	1	42762015	42884932	0	0.055412	0.659435	0.048527
374	Amp	1	42885165	42885165	0	0.053561	0.667705	0.046794
375	Amp	1	42886039	42892307	0	0.054964	0.656734	0.048527
376	Amp	1	42893480	42982700	0	0.057863	0.680494	0.048527
377	Amp	1	42983238	43011286	0	0.057398	0.683062	0.048527
378	Amp	1	43012125	43060354	0	0.054718	0.661098	0.048527
379	Amp	1	43061510	43077946	0	0.050913	0.629917	0.048527
380	Amp	1	43080068	43170047	0	0.04928	0.63937	0.046794
381	Amp	1	43170457	43299010	0	0.041237	0.590671	0.045061
382	Amp	1	43308766	43407703	0	0.04314	0.607467	0.045061
383	Amp	1	43408245	43438213	0	0.044543	0.619852	0.045061
384	Amp	1	43443594	43452783	0	0.051928	0.661874	0.046794
385	Amp	1	43455015	43495046	0	0.040938	0.590338	0.045061
386	Amp	1	43503250	43513166	0	0.04274	0.606237	0.045061
387	Amp	1	43513608	43559471	0	0.046959	0.644763	0.045061
388	Amp	1	43560418	43560740	0	0.045556	0.652062	0.043328
389	Amp	1	43563682	43667357	0	0.040854	0.633691	0.041594
390	Amp	1	43674404	43704645	0	0.03347	0.584962	0.039861
391	Amp	1	43712995	43811143	0	0.02638	0.533335	0.038128
392	Amp	1	43811876	43897130	0	0.029411	0.565152	0.038128
393	Amp	1	43897471	43903232	0	0.030928	0.555791	0.039861
394	Amp	1	43911001	44004703	0	0.027897	0.525549	0.039861
395	Amp	1	44005072	44032289	0	0.029367	0.540217	0.039861
396	Amp	1	44032697	44069988	0	0.02681	0.538105	0.038128
397	Amp	1	44070549	44234176	0	0.028935	0.536521	0.039861
398	Amp	1	44237006	44272393	0	0.027418	0.564509	0.036395
399	Amp	1	44274033	44403934	0	0.025948	0.544643	0.036395
400	Amp	1	44412837	44519510	0	0.026954	0.53038	0.038128
401	Amp	1	44522288	44533942	0	0.022735	0.483323	0.038128
402	Amp	1	44534282	44597423	0	0.021728	0.495345	0.036395
403	Amp	1	44599087	44605524	0	0.023233	0.48852	0.038128
404	Amp	1	44613548	44616668	0	0.016459	0.437365	0.036395
405	Amp	1	44620716	44620716	0	0.014954	0.441974	0.034662
406	Amp	1	44622645	44669091	0	0.012829	0.438831	0.032929
407	Amp	1	44670462	44754558	0	0.009312	0.413156	0.031196
408	Amp	1	44754871	45220531	0	0.010759	0.407527	0.031196
409	Amp	1	45221081	45348386	0	0.012557	0.408732	0.032929
410	Amp	1	45348431	45439674	0	0.010759	0.407527	0.031196
411	Amp	1	45442591	45729224	0	0.014758	0.462234	0.031196
412	Amp	1	45730058	45771128	0	0.018154	0.484309	0.032929
413	Amp	1	45771414	45772399	0	0.014758	0.443301	0.032929
414	Amp	1	45774377	45791218	0	0.01795	0.459551	0.034662
415	Amp	1	45796457	46206325	0	0.018704	0.445907	0.036395
416	Amp	1	46209488	46230405	0	0.015512	0.423129	0.036395
417	Amp	1	46236446	46384885	0	0.014758	0.435635	0.034662
418	Amp	1	46393062	46673431	0	0.010759	0.388529	0.034662
419	Amp	1	46673908	46691589	0	0.009312	0.386646	0.036395
420	Amp	1	46691634	46710592	0	0.011467	0.410197	0.036395
421	Amp	1	46710934	46772958	0	0.009312	0.383658	0.036395
422	Amp	1	46785370	46823698	0	0.011056	0.385218	0.038128
423	Amp	1	46823728	46872530	0	0.014022	0.416156	0.038128
424	Amp	1	46878103	46919911	0	0.016223	0.422076	0.039861
425	Amp	1	46926570	46955948	0	0.018318	0.425545	0.041594
426	Amp	1	46965215	46977720	0	0.019296	0.434934	0.041594
427	Amp	1	46981839	47039045	0	0.017201	0.431873	0.039861
428	Amp	1	47041486	47059549	0	0.021686	0.450428	0.041594
429	Amp	1	47067958	47089593	0	0.017201	0.424985	0.039861
430	Amp	1	47094941	47107741	0	0.013503	0.405726	0.038128
431	Amp	1	47108149	47295297	0	0.015081	0.404905	0.039861
432	Amp	1	47297535	47418910	0	0.018309	0.4189	0.041594
433	Amp	1	47426086	47467422	0	0.016731	0.420294	0.039861
434	Amp	1	47467691	47599485	0	0.015753	0.410539	0.039861
435	Amp	1	47599666	47723959	0	0.019968	0.453697	0.039861
436	Amp	1	47725933	47925857	0	0.017209	0.445539	0.038128
437	Amp	1	47925996	47979240	0	0.017941	0.458935	0.038128
438	Amp	1	47979536	47979536	0	0.016117	0.439909	0.038128
439	Amp	1	47979750	48293602	0	0.01866	0.44786	0.039861
440	Amp	1	48294959	48371665	0	0.017983	0.451744	0.039861
441	Amp	1	48395235	48457210	0	0.017255	0.464694	0.038128
442	Amp	1	48465313	48728699	0	0.015055	0.460522	0.036395
443	Amp	1	48731415	48877350	0	0.013652	0.483891	0.032929
444	Amp	1	48880394	48949172	0	0.016029	0.487914	0.034662
445	Amp	1	48949530	49448451	0	0.020255	0.537889	0.032929
446	Amp	1	49533594	49655065	0	0.024574	0.563637	0.034662
447	Amp	1	49659290	49798053	0	0.020359	0.511154	0.034662
448	Amp	1	49798101	49842260	0	0.021124	0.519931	0.034662
449	Amp	1	49842884	49925468	0	0.019383	0.499912	0.034662
450	Amp	1	49927823	50012278	0	0.022533	0.536053	0.034662
451	Amp	1	50012686	50017342	0	0.023947	0.525973	0.036395
452	Amp	1	50022174	50030375	0	0.017343	0.475568	0.034662
453	Amp	1	50030600	50125820	0	0.0148	0.467225	0.032929
454	Amp	1	50125893	50414094	0	0.012549	0.440043	0.032929
455	Amp	1	50432288	50472176	0	0.011136	0.446469	0.031196
456	Amp	1	50474090	50485971	0	0.010371	0.435126	0.031196
457	Amp	1	50487948	50592383	0	0.018809	0.517634	0.032929
458	Amp	1	50601278	50757541	0	0.012295	0.438958	0.032929
459	Amp	1	50767700	50767700	0	0.014363	0.459071	0.034662
460	Amp	1	50772510	50915188	0	0.013631	0.445255	0.034662
461	Amp	1	50918024	51029129	0	0.011887	0.44669	0.032929
462	Amp	1	51037672	51067956	0	0.014994	0.461178	0.034662
463	Amp	1	51073136	51179163	0	0.019946	0.517997	0.034662
464	Amp	1	51186552	51438943	0	0.014994	0.461127	0.034662
465	Amp	1	51448914	51551897	0	0.017338	0.488571	0.034662
466	Amp	1	51557529	51613295	0	0.014994	0.447571	0.036395
467	Amp	1	51618789	51725763	0	0.017258	0.450845	0.038128
468	Amp	1	51727284	51791212	0	0.019353	0.477896	0.038128
469	Amp	1	51798210	51981407	0	0.021008	0.473851	0.039861
470	Amp	1	51981596	52005681	0	0.018744	0.471771	0.038128
471	Amp	1	52008801	52373308	0	0.017089	0.47591	0.036395
472	Amp	1	52374826	52409115	0	0.018471	0.468697	0.038128
473	Amp	1	52411092	52462776	0	0.016376	0.446849	0.038128
474	Amp	1	52462910	52502019	0	0.018944	0.453055	0.039861
475	Amp	1	52506967	52723418	0	0.020157	0.446483	0.041594
476	Amp	1	52724144	52759691	0	0.018907	0.434523	0.041594
477	Amp	1	52759725	52787297	0	0.016339	0.427781	0.039861
478	Amp	1	52791085	52853708	0	0.018787	0.433902	0.041594
479	Amp	1	52854602	52879304	0	0.030563	0.504643	0.045061
480	Amp	1	52887790	52928334	0	0.018787	0.433902	0.041594
481	Amp	1	52932888	53015446	0	0.017573	0.439927	0.039861
482	Amp	1	53022198	53022198	0	0.0197	0.442126	0.041594
483	Amp	1	53022778	53024068	0	0.018317	0.447556	0.039861
484	Amp	1	53026932	53038070	0	0.019942	0.444449	0.041594
485	Amp	1	53038086	53066295	0	0.017495	0.438786	0.039861
486	Amp	1	53066863	53086208	0	0.015369	0.439582	0.038128
487	Amp	1	53088633	53179726	0	0.019461	0.463699	0.039861
488	Amp	1	53180868	53201394	0	0.022306	0.495626	0.039861
489	Amp	1	53203545	53203545	0	0.023941	0.490612	0.041594
490	Amp	1	53210776	53279206	0	0.019848	0.468714	0.039861
491	Amp	1	53280923	53322607	0	0.022952	0.478854	0.041594
492	Amp	1	53323202	53333626	0	0.025102	0.517901	0.039861
493	Amp	1	53336243	53353309	0	0.041038	0.648691	0.041594
494	Amp	1	53353354	53386182	0	0.038194	0.621495	0.041594
495	Amp	1	53386482	53508909	0	0.035091	0.617556	0.039861
496	Amp	1	53516209	53564459	0	0.033023	0.622333	0.038128
497	Amp	1	53564486	53600645	0	0.036049	0.653897	0.038128
498	Amp	1	53600926	53705539	0	0.03684	0.662151	0.038128
499	Amp	1	53706982	53719716	0	0.039209	0.658287	0.039861
500	Amp	1	53720329	53737434	0	0.038418	0.648116	0.039861
501	Amp	1	53743162	53756898	0	0.040886	0.647607	0.041594
502	Amp	1	53757059	53823748	0	0.038735	0.627045	0.041594
503	Amp	1	53824946	53891409	0	0.036267	0.626659	0.039861
504	Amp	1	53896816	54000129	0	0.033898	0.629086	0.038128
505	Amp	1	54005041	54068228	0	0.037868	0.670497	0.038128
506	Amp	1	54070021	54084389	0	0.038966	0.685686	0.038128
507	Amp	1	54091368	54114339	0	0.041452	0.680682	0.039861
508	Amp	1	54114518	54127363	0	0.04684	0.734552	0.039861
509	Amp	1	54128590	54140726	0	0.042855	0.694792	0.039861
510	Amp	1	54140849	54152762	0	0.041758	0.683845	0.039861
511	Amp	1	54153560	54211455	0	0.039871	0.665019	0.039861
512	Amp	1	54212113	54351381	0	0.041189	0.67817	0.039861
513	Amp	1	54352389	54417490	0	0.043005	0.696293	0.039861
514	Amp	1	54419157	54453786	0	0.041603	0.682296	0.039861
515	Amp	1	54462820	54604905	0	0.042102	0.65891	0.041594
516	Amp	1	54606491	54609389	0	0.038095	0.641141	0.039861
517	Amp	1	54619468	54705851	0	0.03647	0.65333	0.038128
518	Amp	1	54713332	54716627	0	0.036331	0.654904	0.038128
519	Amp	1	54719876	54957108	0	0.034515	0.631805	0.038128
520	Amp	1	54957255	54983945	0	0.02702	0.556876	0.038128
521	Amp	1	54985651	54992142	0	0.025255	0.527685	0.039861
522	Amp	1	54994518	55025942	0	0.029514	0.575302	0.039861
523	Amp	1	55030071	55038977	0	0.032757	0.607661	0.039861
524	Amp	1	55042283	55074160	0	0.032258	0.629781	0.038128
525	Amp	1	55076008	55080453	0	0.034777	0.627533	0.039861
526	Amp	1	55081222	55088337	0	0.036728	0.620045	0.041594
527	Amp	1	55094642	55111343	0	0.034381	0.62069	0.039861
528	Amp	1	55111489	55367890	0	0.031862	0.622627	0.038128
529	Amp	1	55368449	55436141	0	0.042208	0.696363	0.039861
530	Amp	1	55437153	55457366	0	0.040516	0.679483	0.039861
531	Amp	1	55457741	55532732	0	0.042513	0.670262	0.041594
532	Amp	1	55532762	55538222	0	0.041241	0.658103	0.041594
533	Amp	1	55542933	55621031	0	0.037998	0.624908	0.041594
534	Amp	1	55626502	55739245	0	0.04036	0.624243	0.043328
535	Amp	1	55739689	55749404	0	0.038424	0.606475	0.043328
536	Amp	1	55752409	56071324	0	0.036427	0.612653	0.041594
537	Amp	1	56077524	56182242	0	0.028017	0.536784	0.041594
538	Amp	1	56186021	56327007	0	0.032281	0.577552	0.041594
539	Amp	1	56329747	56492536	0	0.033592	0.590087	0.041594
540	Amp	1	56499329	56566795	0	0.032274	0.577072	0.041594
541	Amp	1	56567146	56575272	0	0.033553	0.567946	0.043328
542	Amp	1	56575586	56667321	0	0.035762	0.588227	0.043328
543	Amp	1	56667848	56915462	0	0.0334	0.587391	0.041594
544	Amp	1	56919157	56972743	0	0.032583	0.598401	0.039861
545	Amp	1	56974569	57122009	0	0.041106	0.654963	0.041594
546	Amp	1	57123709	57213581	0	0.035738	0.603636	0.041594
547	Amp	1	57220786	57267705	0	0.038592	0.607704	0.043328
548	Amp	1	57273396	57356639	0	0.035738	0.603636	0.041594
549	Amp	1	57357195	57493371	0	0.037403	0.621963	0.041594
550	Amp	1	57495882	57550124	0	0.038618	0.61092	0.043328
551	Amp	1	57556529	57939452	0	0.037336	0.599147	0.043328
552	Amp	1	57939591	58001242	0	0.038664	0.61134	0.043328
553	Amp	1	58004016	58012690	0	0.039389	0.617994	0.043328
554	Amp	1	58013465	58013661	0	0.037724	0.60271	0.043328
555	Amp	1	58016249	58069336	0	0.03659	0.612603	0.041594
556	Amp	1	58069468	58080656	0	0.038401	0.604718	0.043328
557	Amp	1	58083422	58124744	0	0.040331	0.622439	0.043328
558	Amp	1	58126206	58200404	0	0.038521	0.631063	0.041594
559	Amp	1	58200501	58226681	0	0.039723	0.618786	0.043328
560	Amp	1	58227370	58354245	0	0.042107	0.619445	0.045061
561	Amp	1	58354727	58404053	0	0.033584	0.563678	0.043328
562	Amp	1	58406760	58439071	0	0.032255	0.548531	0.043328
563	Amp	1	58442473	58460524	0	0.03345	0.56234	0.043328
564	Amp	1	58463407	58477823	0	0.032235	0.573882	0.041594
565	Amp	1	58482093	58571240	0	0.03151	0.579205	0.039861
566	Amp	1	58571437	58581834	0	0.032172	0.559863	0.041594
567	Amp	1	58582215	58699370	0	0.030697	0.54576	0.041594
568	Amp	1	58703041	58774316	0	0.030035	0.562885	0.039861
569	Amp	1	58774876	58811511	0	0.036796	0.611119	0.041594
570	Amp	1	58817900	58821019	0	0.035042	0.592607	0.041594
571	Amp	1	58823068	58836154	0	0.039772	0.637829	0.041594
572	Amp	1	58837504	58868733	0	0.040534	0.619315	0.043328
573	Amp	1	58872595	58939323	0	0.043617	0.647613	0.043328
574	Amp	1	58940617	58968488	0	0.046	0.669482	0.043328
575	Amp	1	58969244	58978700	0	0.043278	0.644497	0.043328
576	Amp	1	58979495	58995607	0	0.04471	0.644539	0.045061
577	Amp	1	58999025	59108029	0	0.043278	0.644497	0.043328
578	Amp	1	59111464	59130554	0	0.037812	0.592799	0.043328
579	Amp	1	59130577	59135747	0	0.039968	0.612588	0.043328
580	Amp	1	59136273	59169530	0	0.036708	0.582662	0.043328
581	Amp	1	59171871	59233818	0	0.035945	0.599649	0.041594
582	Amp	1	59239013	59245607	0	0.034859	0.589266	0.041594
583	Amp	1	59246848	59291377	0	0.0306	0.548543	0.041594
584	Amp	1	59293611	59307560	0	0.035789	0.601265	0.041594
585	Amp	1	59307712	59357816	0	0.034368	0.58768	0.041594
586	Amp	1	59362877	59391136	0	0.043064	0.63012	0.045061
587	Amp	1	59394584	59451472	0	0.041692	0.618012	0.045061
588	Amp	1	59453403	59474992	0	0.047175	0.666404	0.045061
589	Amp	1	59477133	59507940	0	0.046012	0.679804	0.043328
590	Amp	1	59509698	59660079	0	0.040529	0.629406	0.043328
591	Amp	1	59662450	59665295	0	0.036658	0.59388	0.043328
592	Amp	1	59674010	59734492	0	0.032214	0.553089	0.043328
593	Amp	1	59735007	59753339	0	0.037974	0.605955	0.043328
594	Amp	1	59754162	59762630	0	0.044479	0.66566	0.043328
595	Amp	1	59766290	59867097	0	0.036287	0.590475	0.043328
596	Amp	1	59869134	59892423	0	0.045385	0.673982	0.043328
597	Amp	1	59893310	59951169	0	0.046862	0.661099	0.045061
598	Amp	1	59951264	59955564	0	0.048245	0.651817	0.046794
599	Amp	1	59956090	59982192	0	0.043866	0.614596	0.046794
600	Amp	1	59982414	60017388	0	0.042389	0.625195	0.045061
601	Amp	1	60028371	60037578	0	0.038316	0.589116	0.045061
602	Amp	1	60039295	60111392	0	0.035049	0.560288	0.045061
603	Amp	1	60117571	60124103	0	0.037755	0.584163	0.045061
604	Amp	1	60124988	60147671	0	0.038585	0.569863	0.046794
605	Amp	1	60155316	60268667	0	0.044251	0.618013	0.046794
606	Amp	1	60273346	60383906	0	0.037962	0.564565	0.046794
607	Amp	1	60387048	60403690	0	0.040814	0.588808	0.046794
608	Amp	1	60408800	60527470	0	0.037962	0.563672	0.046794
609	Amp	1	60528005	60562063	0	0.035257	0.539315	0.046794
610	Amp	1	60564697	60715233	0	0.037858	0.561156	0.046794
611	Amp	1	60716177	60716177	0	0.039961	0.579029	0.046794
612	Amp	1	60719251	60719728	0	0.043066	0.584312	0.048527
613	Amp	1	60722868	60790628	0	0.048979	0.610951	0.05026
614	Amp	1	60790881	60832727	0	0.048075	0.601354	0.05026
615	Amp	1	60833022	60879273	0	0.048512	0.584649	0.051993
616	Amp	1	60879337	60928029	0	0.051349	0.606346	0.051993
617	Amp	1	60928930	60936213	0	0.050912	0.6238	0.05026
618	Amp	1	60937664	60939627	0	0.057875	0.678899	0.05026
619	Amp	1	60941680	61020994	0	0.058419	0.660428	0.051993
620	Amp	1	61023169	61028264	0	0.059969	0.672284	0.051993
621	Amp	1	61028316	61036874	0	0.057735	0.655192	0.051993
622	Amp	1	61037526	61044947	0	0.058965	0.664602	0.051993
623	Amp	1	61052767	61181484	0	0.05586	0.662452	0.05026
624	Amp	1	61181690	61280111	0	0.055258	0.655887	0.05026
625	Amp	1	61286927	61343414	0	0.051367	0.625097	0.05026
626	Amp	1	61347101	61391491	0	0.047935	0.619288	0.048527
627	Amp	1	61392740	61471079	0	0.049636	0.611393	0.05026
628	Amp	1	61471092	61478477	0	0.047935	0.619288	0.048527
629	Amp	1	61480599	61488497	0	0.056408	0.688729	0.048527
630	Amp	1	61489154	61619058	0	0.059218	0.687252	0.05026
631	Amp	1	61620002	61655631	0	0.056408	0.688729	0.048527
632	Amp	1	61660047	61723297	0	0.055864	0.707871	0.046794
633	Amp	1	61723869	61809254	0	0.057552	0.696748	0.048527
634	Amp	1	61810248	61864702	0	0.058851	0.707393	0.048527
635	Amp	1	61868247	61931808	0.001323	0.063985	0.752169	0.05026
636	Amp	1	61932574	61938324	0.060686	0.066654	0.773285	0.05026
637	Amp	1	61942126	61949251	0.1237	0.06914	0.766521	0.051993
638	Amp	1	61949717	61989112	0.079652	0.067401	0.753224	0.051993
639	Amp	1	62000561	62000561	0.050473	0.066102	0.740186	0.051993
640	Amp	1	62002981	62011562	0	0.062995	0.740315	0.05026
641	Amp	1	62012246	62027199	0	0.060428	0.720003	0.05026
642	Amp	1	62029828	62047622	0	0.057942	0.725347	0.048527
643	Amp	1	62051011	62056889	0	0.061007	0.725	0.05026
644	Amp	1	62057402	62057402	0.010261	0.064419	0.752002	0.05026
645	Amp	1	62057551	62124931	0.029031	0.065323	0.733846	0.051993
646	Amp	1	62128846	62131671	0.138391	0.069784	0.767969	0.051993
647	Amp	1	62133118	62144614	0.181932	0.071645	0.784496	0.051993
648	Amp	1	62146924	62154859	0	0.055708	0.685449	0.05026
649	Amp	1	62159179	62180510	0	0.05304	0.662771	0.05026
650	Amp	1	62181086	62198029	0	0.051296	0.648971	0.05026
651	Amp	1	62202849	62215309	0	0.049252	0.653597	0.048527
652	Amp	1	62226599	62313972	0	0.051192	0.646408	0.05026
653	Amp	1	62316832	62348809	0	0.049331	0.615027	0.051993
654	Amp	1	62352546	62412281	0	0.047392	0.620886	0.05026
655	Amp	1	62412747	62463883	0	0.04363	0.591123	0.05026
656	Amp	1	62475245	62640045	0	0.044311	0.576631	0.051993
657	Amp	1	62641096	62691193	0	0.040727	0.563597	0.05026
658	Amp	1	62694022	62721951	0	0.042196	0.578029	0.051993
659	Amp	1	62722415	62814882	0	0.043731	0.590426	0.051993
660	Amp	1	62817647	62833307	0	0.046777	0.612405	0.051993
661	Amp	1	62847648	62924111	0	0.039955	0.577504	0.05026
662	Amp	1	62926040	62989742	0	0.038072	0.58097	0.048527
663	Amp	1	62989983	63103187	0	0.039832	0.595391	0.048527
664	Amp	1	63105681	63200379	0	0.037098	0.572573	0.048527
665	Amp	1	63203083	63228450	0	0.035182	0.574528	0.046794
666	Amp	1	63230017	63262878	0	0.04181	0.609726	0.048527
667	Amp	1	63277029	63296376	0	0.035182	0.557951	0.048527
668	Amp	1	63301926	63301963	0	0.039765	0.575708	0.05026
669	Amp	1	63302422	63311350	0	0.042677	0.581528	0.051993
670	Amp	1	63311502	63313675	0	0.039729	0.55898	0.051993
671	Amp	1	63327484	63391764	0	0.041438	0.554119	0.053726
672	Amp	1	63393093	63443177	0	0.039729	0.55898	0.051993
673	Amp	1	63447222	63524073	0	0.038094	0.564585	0.05026
674	Amp	1	63524525	63667643	0	0.031707	0.527889	0.048527
675	Amp	1	63671276	63683182	0	0.030803	0.539762	0.046794
676	Amp	1	63684304	63699819	0	0.032206	0.5329	0.048527
677	Amp	1	63699874	63755972	0	0.032743	0.522188	0.048527
678	Amp	1	63756046	63769306	0	0.032206	0.534127	0.046794
679	Amp	1	63769639	63776262	0	0.034106	0.531702	0.048527
680	Amp	1	63783841	63790347	0	0.033425	0.545603	0.046794
681	Amp	1	63794075	63876855	0	0.031524	0.548656	0.045061
682	Amp	1	63878023	63890887	0	0.032127	0.53346	0.046794
683	Amp	1	63893653	63931720	0	0.031524	0.548656	0.045061
684	Amp	1	63935860	64137253	0	0.028612	0.54059	0.043328
685	Amp	1	64141390	64254648	0	0.02721	0.54863	0.041594
686	Amp	1	64258032	64271273	0	0.052662	0.72944	0.045061
687	Amp	1	64279307	64279314	0	0.053401	0.7087	0.046794
688	Amp	1	64279924	64311559	0	0.027948	0.531771	0.043328
689	Amp	1	64312587	64330680	0	0.032206	0.552053	0.045061
690	Amp	1	64338058	64485524	0	0.034143	0.548067	0.046794
691	Amp	1	64495393	64561325	0	0.035924	0.543528	0.048527
692	Amp	1	64561525	64616915	0	0.035185	0.557383	0.046794
693	Amp	1	64617704	64637952	0	0.036282	0.566706	0.046794
694	Amp	1	64638514	64659430	0	0.041782	0.613449	0.046794
695	Amp	1	64661519	64792854	0	0.040001	0.620851	0.045061
696	Amp	1	64798014	64850544	0	0.036967	0.617839	0.043328
697	Amp	1	64850558	64869774	0	0.038472	0.607358	0.045061
698	Amp	1	64872615	64924820	0	0.036967	0.617839	0.043328
699	Amp	1	64930732	65056419	0	0.021031	0.490912	0.041594
700	Amp	1	65056445	65300299	0	0.027774	0.556049	0.041594
701	Amp	1	65303286	65665101	0	0.021031	0.507593	0.039861
702	Amp	1	65672819	65736831	0	0.019521	0.494772	0.039861
703	Amp	1	65738080	65799589	0	0.020376	0.482331	0.041594
704	Amp	1	65799670	65807607	0	0.017628	0.472326	0.039861
705	Amp	1	65808473	65845182	0	0.020325	0.481683	0.041594
706	Amp	1	65846077	65917332	0	0.017628	0.472326	0.039861
707	Amp	1	65919747	65956204	0	0.018212	0.460144	0.041594
708	Amp	1	65961757	66008439	0	0.01934	0.470931	0.041594
709	Amp	1	66009271	66011677	0	0.021039	0.467686	0.043328
710	Amp	1	66012555	66145285	0	0.019327	0.468888	0.041594
711	Amp	1	66146724	66369132	0	0.018747	0.483491	0.039861
712	Amp	1	66369575	66470613	0	0.017893	0.49655	0.038128
713	Amp	1	66470858	66557660	0	0.015796	0.496207	0.036395
714	Amp	1	66557939	66790061	0	0.014097	0.484508	0.036395
715	Amp	1	66790357	66882985	0	0.011033	0.472969	0.034662
716	Amp	1	66883588	66921838	0	0.011715	0.4579	0.036395
717	Amp	1	66925889	67190212	0	0.013642	0.457188	0.038128
718	Amp	1	67190271	67429213	0	0.011715	0.4579	0.036395
719	Amp	1	67438134	67573659	0	0.012693	0.455264	0.038128
720	Amp	1	67576089	67850739	0	0.019172	0.510401	0.039861
721	Amp	1	67851121	67940092	0	0.020074	0.506228	0.041594
722	Amp	1	67945992	67957395	0	0.02177	0.501551	0.043328
723	Amp	1	67959032	68007641	0	0.022947	0.49381	0.045061
724	Amp	1	68011295	68075269	0	0.022045	0.485849	0.045061
725	Amp	1	68082547	68084538	0	0.015567	0.425925	0.045061
726	Amp	1	68087889	68105537	0	0.014589	0.413572	0.045061
727	Amp	1	68106523	68170064	0	0.022931	0.493614	0.045061
728	Amp	1	68173702	68256176	0	0.028046	0.538761	0.045061
729	Amp	1	68256297	68276569	0	0.027364	0.554051	0.043328
730	Amp	1	68281649	68283110	0	0.028444	0.543752	0.045061
731	Amp	1	68284332	68286694	0	0.023328	0.51391	0.043328
732	Amp	1	68294152	68340917	0	0.023984	0.499928	0.045061
733	Amp	1	68350912	68379753	0	0.018017	0.4307	0.046794
734	Amp	1	68379928	68499756	0	0.017436	0.425767	0.046794
735	Amp	1	68504159	68514625	0	0.016259	0.430594	0.045061
736	Amp	1	68515055	68603148	0	0.015444	0.423395	0.045061
737	Amp	1	68603356	68639974	0	0.014364	0.42888	0.043328
738	Amp	1	68643768	69075182	0	0.015844	0.442458	0.043328
739	Amp	1	69078125	69259975	0	0.0171	0.476328	0.039861
740	Amp	1	69261156	69296984	0	0.015621	0.460377	0.039861
741	Amp	1	69300650	69626636	0	0.017466	0.462091	0.041594
742	Amp	1	69630213	69691379	0	0.018711	0.457989	0.043328
743	Amp	1	69691383	70337111	0	0.017455	0.44782	0.043328
744	Amp	1	70341222	70948625	0	0.015609	0.434038	0.043328
745	Amp	1	70993290	71354048	0	0.01405	0.43721	0.041594
746	Amp	1	71355684	71879365	0	0.019648	0.472146	0.043328
747	Amp	1	71882544	71882544	0	0.024776	0.526951	0.041594
748	Amp	1	71884305	72043643	0	0.026002	0.517134	0.043328
749	Amp	1	72049851	72050849	0	0.03569	0.606051	0.043328
750	Amp	1	72054511	72111831	0	0.034463	0.619573	0.041594
751	Amp	1	72117692	72245386	0	0.024776	0.525866	0.041594
752	Amp	1	72245505	72398059	0	0.026148	0.517424	0.043328
753	Amp	1	72398799	72539622	0	0.024776	0.525866	0.041594
754	Amp	1	72542279	72542484	0	0.027096	0.526866	0.043328
755	Amp	1	72631417	72631417	0	0.036964	0.607705	0.045061
756	Amp	1	72631497	72643389	0	0.040139	0.635724	0.045061
757	Amp	1	72643449	72656579	0	0.037818	0.639117	0.043328
758	Amp	1	72661819	72690912	0	0.040956	0.655255	0.043328
759	Amp	1	72692743	72699820	0	0.032184	0.59868	0.041594
760	Amp	1	72702390	73101370	0	0.03014	0.579139	0.041594
761	Amp	1	73105640	73245645	0	0.031853	0.594067	0.043328
762	Amp	1	73250091	73650996	0	0.027258	0.551891	0.043328
763	Amp	1	73654171	73719524	0	0.021985	0.496869	0.045061
764	Amp	1	73724043	73761619	0	0.017188	0.454527	0.045061
765	Amp	1	73761854	73938278	0	0.017842	0.443258	0.046794
766	Amp	1	73938573	74883067	0	0.017188	0.458556	0.043328
767	Amp	1	74883325	74884054	0	0.018551	0.453071	0.045061
768	Amp	1	74886515	75098864	0	0.019137	0.441267	0.046794
769	Amp	1	75102013	75102013	0	0.017773	0.446087	0.045061
770	Amp	1	75102718	75189369	0	0.019189	0.461636	0.045061
771	Amp	1	75189963	75362755	0	0.019854	0.450186	0.046794
772	Amp	1	75368769	75400130	0	0.01847	0.450451	0.045061
773	Amp	1	75400977	75427199	0	0.020354	0.449779	0.046794
774	Amp	1	75429272	75532129	0	0.018658	0.452104	0.045061
775	Amp	1	75533010	75771334	0	0.017242	0.439607	0.045061
776	Amp	1	75771620	75865988	0	0.018817	0.436829	0.046794
777	Amp	1	75873354	76087598	0	0.016577	0.439756	0.043328
778	Amp	1	76091265	76152308	0	0.022246	0.491965	0.043328
779	Amp	1	76154568	76388163	0	0.021001	0.514087	0.039861
780	Amp	1	76393816	76399666	0	0.023588	0.512217	0.039861
781	Amp	1	76401611	76444546	0	0.025643	0.5107	0.041594
782	Amp	1	76446102	76612646	0	0.023588	0.512217	0.039861
783	Amp	1	76612910	77064491	0	0.021001	0.501569	0.036395
784	Amp	1	77065538	77174481	0	0.015332	0.433524	0.038128
785	Amp	1	77175129	77243000	0	0.014747	0.44777	0.036395
786	Amp	1	77245144	77333260	0	0.016215	0.47142	0.038128
787	Amp	1	77337245	77443300	0	0.014747	0.456101	0.038128
788	Amp	1	77446829	77568079	0	0.015513	0.443911	0.039861
789	Amp	1	77571872	77572715	0	0.018281	0.461228	0.039861
790	Amp	1	77576580	77709830	0	0.019756	0.457339	0.041594
791	Amp	1	77711189	77792266	0	0.021095	0.453662	0.043328
792	Amp	1	77794957	77823634	0	0.023158	0.454415	0.045061
793	Amp	1	77824722	78145185	0	0.025403	0.474231	0.045061
794	Amp	1	78157045	78587591	0	0.024064	0.478583	0.043328
795	Amp	1	78588390	78609328	0	0.034999	0.552758	0.046794
796	Amp	1	78613481	78623278	0	0.030325	0.513036	0.046794
797	Amp	1	78624924	78704611	0	0.029559	0.526009	0.045061
798	Amp	1	78709270	78805583	0	0.030126	0.500816	0.046794
799	Amp	1	78810379	78838065	0	0.030581	0.491075	0.048527
800	Amp	1	78845087	78854115	0	0.029106	0.495638	0.046794
801	Amp	1	79089920	79261549	0	0.038603	0.57635	0.046794
802	Amp	1	79276508	79948066	0	0.022844	0.453314	0.045061
803	Amp	1	79950023	80706081	0	0.019655	0.425168	0.045061
804	Amp	1	80707343	80911623	0	0.016517	0.413194	0.043328
805	Amp	1	80911843	81054324	0	0.015951	0.435349	0.039861
806	Amp	1	81054948	81369596	0	0.013183	0.426266	0.038128
807	Amp	1	81372563	81444495	0	0.011299	0.446763	0.038128
808	Amp	1	81444792	81591226	0	0.01306	0.446323	0.039861
809	Amp	1	81594841	81608719	0	0.014004	0.437404	0.041594
810	Amp	1	81612624	82211523	0	0.01306	0.446323	0.039861
811	Amp	1	82211906	82307423	0	0.011524	0.43023	0.039861
812	Amp	1	82314265	82886070	0	0.012059	0.417545	0.041594
813	Amp	1	82887087	82905733	0	0.010298	0.398091	0.038128
814	Amp	1	82906260	83429214	0	0.011226	0.390257	0.039861
815	Amp	1	83438185	83810806	0	0.018667	0.483097	0.041594
816	Amp	1	83813808	83844180	0	0.021256	0.505276	0.041594
817	Amp	1	83844510	83857732	0	0.025582	0.525018	0.043328
818	Amp	1	83858018	83864341	0	0.022919	0.500578	0.043328
819	Amp	1	83864808	83909975	0	0.021256	0.505276	0.041594
820	Amp	1	83913209	84019915	0	0.013815	0.4134	0.039861
821	Amp	1	84024773	84080491	0	0.01584	0.415986	0.041594
822	Amp	1	84084215	84096595	0	0.015305	0.428603	0.039861
823	Amp	1	84103331	84172715	0	0.014187	0.436418	0.038128
824	Amp	1	84174010	84226850	0	0.017094	0.461892	0.038128
825	Amp	1	84239798	84417213	0	0.014187	0.451685	0.036395
826	Amp	1	84417267	84610414	0	0.015154	0.441248	0.038128
827	Amp	1	84613346	84629316	0	0.013875	0.430553	0.038128
828	Amp	1	84630999	84755154	0	0.01185	0.428414	0.036395
829	Amp	1	84758575	84803171	0	0.013241	0.423455	0.038128
830	Amp	1	84809867	84933802	0	0.011606	0.423284	0.036395
831	Amp	1	84934431	85166913	0	0.012156	0.410344	0.038128
832	Amp	1	85169730	85412453	0	0.014769	0.437676	0.038128
833	Amp	1	85425774	85743698	0	0.012156	0.410421	0.038128
834	Amp	1	85758239	85804978	0	0.010765	0.429539	0.034662
835	Amp	1	85809602	85949044	0	0.013743	0.441622	0.036395
836	Amp	1	85950001	86000156	0	0.014961	0.434253	0.038128
837	Amp	1	86003611	86029875	0	0.01441	0.448332	0.036395
838	Amp	1	86030066	86077764	0	0.013442	0.459646	0.034662
839	Amp	1	86083815	86094378	0	0.012224	0.469127	0.032929
840	Amp	1	86095431	87000958	0	0.009635	0.458638	0.031196
841	Amp	1	87005564	87502742	0	0.006657	0.442043	0.029463
842	Amp	1	87508127	88244365	0	0.008447	0.441191	0.031196
843	Amp	1	88247823	88422690	0	0.016465	0.514811	0.032929
844	Amp	1	88423242	88527108	0	0.019126	0.539575	0.034662
845	Amp	1	88530222	88538133	0	0.019637	0.525635	0.036395
846	Amp	1	88539302	89154109	0	0.019126	0.52005	0.036395
847	Amp	1	89160087	89278330	0	0.02061	0.526518	0.036395
848	Amp	1	89281244	89374781	0	0.019683	0.541949	0.034662
849	Amp	1	89376219	89819631	0	0.018199	0.552549	0.032929
850	Amp	1	89835044	89849849	0	0.023221	0.608738	0.036395
851	Amp	1	89849934	89862703	0	0.021432	0.617839	0.034662
852	Amp	1	89868621	89987275	0	0.02346	0.610579	0.036395
853	Amp	1	89990538	90601949	0	0.021432	0.617839	0.034662
854	Amp	1	90603288	90751078	0	0.018771	0.592697	0.034662
855	Amp	1	90752106	91321022	0	0.019908	0.576898	0.036395
856	Amp	1	91327260	91333702	0	0.011464	0.476358	0.034662
857	Amp	1	91333712	91337198	0	0.014998	0.516903	0.034662
858	Amp	1	91337226	91377806	0	0.019712	0.602841	0.034662
859	Amp	1	91379423	91407103	0	0.01475	0.557244	0.032929
860	Amp	1	91410083	91453883	0	0.016864	0.590129	0.034662
861	Amp	1	91453960	91471682	0	0.017332	0.569823	0.036395
862	Amp	1	91472138	91483783	0	0.015218	0.54673	0.036395
863	Amp	1	91487748	91608690	0	0.01475	0.565881	0.034662
864	Amp	1	91609205	91679376	0	0.017437	0.568289	0.036395
865	Amp	1	91745053	92028440	0	0.01475	0.565881	0.034662
866	Amp	1	92029055	92065545	0	0.022873	0.638901	0.036395
867	Amp	1	92069820	92159260	0	0.02594	0.672415	0.036395
868	Amp	1	92161113	92170137	0	0.018057	0.615587	0.034662
869	Amp	1	92176097	92476909	0	0.033	0.749562	0.036395
870	Amp	1	92479712	93002478	0	0.018057	0.615587	0.034662
871	Amp	1	93002505	93019705	0	0.01499	0.577173	0.034662
872	Amp	1	93021792	93092574	0	0.015597	0.558582	0.036395
873	Amp	1	93094568	93128614	0	0.018701	0.566279	0.038128
874	Amp	1	93136637	93165502	0	0.015597	0.558582	0.036395
875	Amp	1	93174578	93198911	0	0.020733	0.601798	0.038128
876	Amp	1	93199387	93347087	0	0.026515	0.662108	0.038128
877	Amp	1	93348442	93361490	0	0.027293	0.642999	0.038128
878	Amp	1	93372853	93387160	0	0.028724	0.660584	0.039861
879	Amp	1	93397975	93431460	0	0.034656	0.689769	0.041594
880	Amp	1	93432067	93495632	0	0.036038	0.706184	0.041594
881	Amp	1	93499473	93838683	0	0.037366	0.724795	0.041594
882	Amp	1	93838789	93975459	0	0.039073	0.746071	0.041594
883	Amp	1	93977183	94133728	0	0.028269	0.659729	0.043328
884	Amp	1	94140148	94160112	0	0.025168	0.621249	0.043328
885	Amp	1	94163574	94586920	0	0.024031	0.636264	0.041594
886	Amp	1	94589663	94661129	0	0.022561	0.624139	0.041594
887	Amp	1	94661145	94764974	0	0.021179	0.610923	0.041594
888	Amp	1	94765813	94910808	0	0.022712	0.625578	0.041594
889	Amp	1	94911873	95065443	0	0.024383	0.616002	0.043328
890	Amp	1	95065817	95214568	0	0.026686	0.637142	0.043328
891	Amp	1	95215344	95392320	0	0.025015	0.625905	0.043328
892	Amp	1	95394089	95395007	0	0.032585	0.671519	0.045061
893	Amp	1	95396166	95464562	0	0.033241	0.652827	0.046794
894	Amp	1	95474211	95612790	0	0.034055	0.659746	0.046794
895	Amp	1	95616207	95659379	0	0.028919	0.62707	0.045061
896	Amp	1	95660850	95696727	0	0.020534	0.575195	0.043328
897	Amp	1	95699010	95833984	0	0.019928	0.59138	0.041594
898	Amp	1	95834383	95931946	0	0.016092	0.548706	0.043328
899	Amp	1	95932192	96156183	0	0.014385	0.533039	0.043328
900	Amp	1	96156720	96345190	0	0.017179	0.552556	0.045061
901	Amp	1	96345465	96579390	0	0.023232	0.602294	0.045061
902	Amp	1	96580534	96653271	0	0.023811	0.585656	0.046794
903	Amp	1	96654211	96694171	0	0.026736	0.607699	0.046794
904	Amp	1	96694997	96698004	0	0.026157	0.625185	0.045061
905	Amp	1	96705149	96964310	0	0.020371	0.58111	0.043328
906	Amp	1	96967364	97001030	0	0.019593	0.597887	0.041594
907	Amp	1	97004996	97185793	0	0.018036	0.583	0.041594
908	Amp	1	97186364	97734567	0	0.019447	0.572852	0.043328
909	Amp	1	97735163	97874736	0	0.019884	0.555453	0.045061
910	Amp	1	97884105	97916926	0	0.021318	0.547071	0.046794
911	Amp	1	97927699	97963456	0	0.020881	0.563479	0.045061
912	Amp	1	97965628	97977953	0	0.020225	0.579344	0.043328
913	Amp	1	97981026	98014572	0	0.02254	0.577815	0.045061
914	Amp	1	98016564	98020076	0	0.021106	0.587762	0.043328
915	Amp	1	98022207	98062896	0	0.022303	0.598752	0.043328
916	Amp	1	98063822	98183904	0	0.023226	0.583868	0.045061
917	Amp	1	98186695	98224658	0	0.025593	0.603863	0.045061
918	Amp	1	98227662	98430345	0	0.023402	0.582936	0.045061
919	Amp	1	98432333	98448287	0	0.024781	0.595106	0.045061
920	Amp	1	98449925	98496758	0	0.023276	0.565905	0.045061
921	Amp	1	98498942	98636043	0	0.020909	0.545017	0.045061
922	Amp	1	98638624	98783583	0	0.02248	0.573173	0.045061
923	Amp	1	98789865	98860578	0	0.018968	0.562081	0.043328
924	Amp	1	98860788	99016602	0	0.02154	0.56349	0.045061
925	Amp	1	99017164	99120960	0	0.022449	0.571512	0.045061
926	Amp	1	99123347	99181958	0	0.019877	0.570424	0.043328
927	Amp	1	99188299	99226471	0	0.023041	0.577167	0.045061
928	Amp	1	99227603	99351242	0	0.019877	0.570424	0.043328
929	Amp	1	99353117	99379014	0	0.022827	0.575281	0.045061
930	Amp	1	99382221	99464865	0	0.024172	0.565401	0.046794
931	Amp	1	99466972	99515889	0	0.022762	0.574481	0.045061
932	Amp	1	99516232	99523197	0	0.024601	0.568834	0.046794
933	Amp	1	99526816	99786661	0	0.023256	0.578846	0.045061
934	Amp	1	99793338	99802852	0	0.021417	0.605114	0.041594
935	Amp	1	99806469	99931612	0	0.024176	0.606514	0.043328
936	Amp	1	99936000	99941694	0	0.021225	0.583178	0.043328
937	Amp	1	99942312	100257351	0	0.021779	0.565634	0.045061
938	Amp	1	100258092	100274916	0	0.021225	0.583178	0.043328
939	Amp	1	100278704	100330564	0	0.022868	0.575245	0.045061
940	Amp	1	100332480	100398275	0	0.017799	0.551734	0.043328
941	Amp	1	100402069	100422451	0	0.014426	0.520772	0.043328
942	Amp	1	100424720	100428514	0	0.015493	0.510158	0.045061
943	Amp	1	100430304	100467010	0	0.012734	0.50496	0.043328
944	Amp	1	100471456	100510102	0	0.011092	0.510294	0.041594
945	Amp	1	100513237	100531509	0	0.012987	0.498152	0.045061
946	Amp	1	100531539	100569605	0	0.016071	0.527011	0.045061
947	Amp	1	100571549	100597665	0	0.014176	0.530056	0.043328
948	Amp	1	100606010	100819454	0	0.013109	0.541941	0.041594
949	Amp	1	100826712	101040570	0	0.010025	0.527045	0.039861
950	Amp	1	101047896	101055849	0	0.008455	0.495386	0.039861
951	Amp	1	101059192	101082672	0	0.014591	0.536393	0.041594
952	Amp	1	101083801	101219482	0	0.016239	0.552156	0.041594
953	Amp	1	101224933	101265818	0	0.013877	0.524938	0.041594
954	Amp	1	101265853	101279521	0	0.016864	0.554742	0.041594
955	Amp	1	101280478	101330407	0	0.013877	0.526189	0.041594
956	Amp	1	101332533	101396547	0	0.017113	0.55712	0.041594
957	Amp	1	101397338	101406099	0	0.020168	0.584447	0.043328
958	Amp	1	101408163	101520332	0	0.024928	0.616703	0.045061
959	Amp	1	101521764	101645157	0	0.027204	0.607936	0.048527
960	Amp	1	101647296	101750652	0	0.024928	0.59337	0.048527
961	Amp	1	101751584	101817983	0	0.02285	0.576337	0.048527
962	Amp	1	101819272	101823806	0	0.026393	0.584747	0.05026
963	Amp	1	101824797	101844887	0	0.020405	0.537363	0.05026
964	Amp	1	101845946	101863632	0	0.016862	0.527262	0.048527
965	Amp	1	101864595	101939909	0	0.019418	0.529552	0.05026
966	Amp	1	101942301	102151497	0	0.021537	0.546317	0.05026
967	Amp	1	102154133	102190128	0	0.023858	0.54631	0.051993
968	Amp	1	102393290	102393290	0	0.024473	0.570445	0.05026
969	Amp	1	102396750	102467860	0	0.025724	0.562436	0.051993
970	Amp	1	102474134	102685320	0	0.024473	0.570445	0.05026
971	Amp	1	102686302	102710519	0	0.022715	0.556532	0.05026
972	Amp	1	102716165	102839231	0	0.017541	0.51559	0.05026
973	Amp	1	102851916	102928545	0	0.02429	0.550028	0.051993
974	Amp	1	102934758	103054082	0	0.025023	0.524586	0.055459
975	Amp	1	103054273	103122162	0	0.02658	0.535753	0.055459
976	Amp	1	103122951	103131925	0	0.024259	0.535419	0.053726
977	Amp	1	103134999	103441218	0	0.022846	0.524957	0.053726
978	Amp	1	103444883	103524255	0	0.024416	0.52355	0.055459
979	Amp	1	103524378	103524378	0	0.022584	0.513608	0.053726
980	Amp	1	103793015	103964061	0	0.019434	0.494246	0.051993
981	Amp	1	103977129	104153553	0	0.024495	0.516692	0.053726
982	Amp	1	104156571	104157967	0	0.02318	0.507253	0.055459
983	Amp	1	104158275	104396829	0	0.018119	0.485226	0.053726
984	Amp	1	104398193	104447715	0	0.020191	0.487405	0.055459
985	Amp	1	104449841	104512552	0	0.01862	0.462181	0.057192
986	Amp	1	104520924	104637751	0	0.019919	0.459229	0.058925
987	Amp	1	104649495	104656995	0	0.018928	0.452538	0.058925
988	Amp	1	104667757	104692669	0	0.016637	0.450325	0.057192
989	Amp	1	104702933	105303994	0	0.013684	0.443219	0.055459
990	Amp	1	105313521	105412815	0	0.012385	0.46261	0.053726
991	Amp	1	105412845	106083834	0	0.013998	0.459722	0.055459
992	Amp	1	106087328	106104431	0	0.016949	0.493238	0.057192
993	Amp	1	106104486	106162417	0	0.013998	0.487491	0.055459
994	Amp	1	106171723	106218066	0	0.022318	0.530567	0.057192
995	Amp	1	106218079	106228332	0	0.023969	0.524322	0.058925
996	Amp	1	106228581	106293716	0	0.027472	0.533008	0.060659
997	Amp	1	106295084	106373864	0	0.02582	0.540096	0.058925
998	Amp	1	106374111	106391079	0	0.027857	0.553842	0.058925
999	Amp	1	106391157	106395116	0	0.030205	0.556067	0.060659
1000	Amp	1	106398959	106426723	0	0.033062	0.569928	0.062392
1001	Amp	1	106427428	106498154	0	0.030714	0.568162	0.060659
1002	Amp	1	106499917	106563038	0	0.04109	0.619326	0.062392
1003	Amp	1	106563643	106704192	0	0.043564	0.626327	0.060659
1004	Amp	1	106707784	106802513	0	0.04109	0.609271	0.060659
1005	Amp	1	106802542	106972182	0	0.039018	0.613211	0.058925
1006	Amp	1	106972857	107030186	0	0.042404	0.636063	0.058925
1007	Amp	1	107030897	107079498	0	0.043932	0.627906	0.060659
1008	Amp	1	107081853	107207977	0	0.044772	0.61582	0.062392
1009	Amp	1	107208604	107236395	0	0.043245	0.620049	0.062392
1010	Amp	1	107243039	107331193	0	0.039859	0.597512	0.062392
1011	Amp	1	107332154	107471724	0	0.039018	0.611556	0.060659
1012	Amp	1	107475930	107508989	0	0.041192	0.625151	0.060659
1013	Amp	1	107509452	107533721	0	0.041924	0.631331	0.060659
1014	Amp	1	107534480	107546964	0	0.044269	0.646704	0.060659
1015	Amp	1	107547122	107597014	0	0.041924	0.629952	0.060659
1016	Amp	1	107597353	107618344	0	0.043334	0.621605	0.062392
1017	Amp	1	107618975	107629681	0	0.045574	0.618701	0.064125
1018	Amp	1	107630997	107695849	0	0.043401	0.621589	0.062392
1019	Amp	1	107697302	107713447	0	0.046422	0.623908	0.064125
1020	Amp	1	107720441	107776767	0	0.043401	0.608593	0.064125
1021	Amp	1	107777345	107785756	0	0.040215	0.588837	0.064125
1022	Amp	1	107786293	107859481	0	0.042607	0.603666	0.064125
1023	Amp	1	107859987	107872692	0	0.044818	0.602548	0.065858
1024	Amp	1	107872717	107875930	0	0.044085	0.595763	0.065858
1025	Amp	1	107876735	107912933	0	0.047674	0.614815	0.065858
1026	Amp	1	107918099	107920222	0	0.044085	0.608585	0.064125
1027	Amp	1	107920797	107947953	0	0.047287	0.628441	0.064125
1028	Amp	1	107949619	107968879	0	0.045877	0.636746	0.062392
1029	Amp	1	107972725	108130783	0	0.047416	0.629081	0.064125
1030	Amp	1	108131152	108171920	0	0.041823	0.584602	0.064125
1031	Amp	1	108176950	108330898	0	0.044151	0.602642	0.064125
1032	Amp	1	108330960	108471686	0	0.04194	0.603794	0.062392
1033	Amp	1	108479495	108479495	0	0.043428	0.589591	0.065858
1034	Amp	1	108479650	108481648	0	0.045878	0.590191	0.067591
1035	Amp	1	108486251	108509733	0	0.046391	0.578379	0.069324
1036	Amp	1	108514114	108541678	0	0.038072	0.544261	0.067591
1037	Amp	1	108544068	108564040	0	0.038574	0.533532	0.069324
1038	Amp	1	108565773	108597621	0	0.041317	0.531481	0.07279
1039	Amp	1	108597978	108634800	0	0.038989	0.518762	0.07279
1040	Amp	1	108635364	108652273	0	0.038413	0.519696	0.071057
1041	Amp	1	108658962	108665524	0	0.039373	0.512566	0.07279
1042	Amp	1	108673894	108808411	0	0.041585	0.51245	0.074523
1043	Amp	1	108814834	108851521	0	0.039972	0.528509	0.071057
1044	Amp	1	108854286	108868671	0	0.04218	0.51861	0.074523
1045	Amp	1	108872601	108872702	0	0.041678	0.530767	0.07279
1046	Amp	1	108875420	108914228	0	0.04363	0.541433	0.07279
1047	Amp	1	108916674	108941228	0	0.042091	0.546025	0.071057
1048	Amp	1	108961034	108966266	0	0.039883	0.546724	0.069324
1049	Amp	1	108966416	108967060	0.181932	0.071655	0.694826	0.07279
1050	Amp	1	108968731	108985239	0	0.039883	0.546724	0.069324
1051	Amp	1	108985482	109131659	0	0.038626	0.553345	0.067591
1052	Amp	1	109146692	109277504	0	0.040004	0.547414	0.069324
1053	Amp	1	109277968	109489811	0	0.041462	0.553225	0.071057
1054	Amp	1	109500895	109553331	0	0.043442	0.557585	0.074523
1055	Amp	1	109553771	109714002	0	0.04431	0.549441	0.076256
1056	Amp	1	109718120	109866873	0	0.040882	0.529508	0.076256
1057	Amp	1	109869470	109903595	0	0.039394	0.533866	0.074523
1058	Amp	1	109908341	109936935	0	0.042065	0.536314	0.076256
1059	Amp	1	109938856	109983974	0	0.040607	0.528709	0.076256
1060	Amp	1	109988250	109993581	0	0.030231	0.478417	0.074523
1061	Amp	1	109994869	110009477	0	0.028854	0.482282	0.07279
1062	Amp	1	110009646	110206683	0	0.027986	0.489185	0.071057
1063	Amp	1	110217174	110399703	0	0.029236	0.496182	0.071057
1064	Amp	1	110401565	110435241	0	0.030569	0.491651	0.07279
1065	Amp	1	110443411	110465843	0	0.029318	0.483881	0.07279
1066	Amp	1	110468753	110480968	0	0.029789	0.47776	0.074523
1067	Amp	1	110484902	110503002	0	0.029318	0.47525	0.074523
1068	Amp	1	110503706	110504403	0	0.027078	0.474324	0.07279
1069	Amp	1	110509377	110599033	0	0.028705	0.471979	0.074523
1070	Amp	1	110600189	110619055	0	0.029552	0.476496	0.074523
1071	Amp	1	110619391	110664331	0	0.027078	0.474324	0.07279
1072	Amp	1	110665098	110683099	0	0.028272	0.481946	0.07279
1073	Amp	1	110683584	110780620	0	0.027759	0.49083	0.071057
1074	Amp	1	110782105	110788274	0	0.025547	0.490412	0.069324
1075	Amp	1	110869657	111060588	0	0.029039	0.510446	0.069324
1076	Amp	1	111062018	111107005	0	0.029637	0.509426	0.069324
1077	Amp	1	111107794	111194776	0	0.026967	0.506038	0.067591
1078	Amp	1	111195556	111224153	0	0.0409	0.573837	0.069324
1079	Amp	1	111226615	111249642	0	0.038863	0.563561	0.067591
1080	Amp	1	111249795	111285127	0	0.037669	0.556536	0.067591
1081	Amp	1	111297256	111321002	0	0.040343	0.558648	0.069324
1082	Amp	1	111321320	111332906	0	0.034824	0.539872	0.067591
1083	Amp	1	111342307	111351887	0	0.032151	0.53721	0.065858
1084	Amp	1	111352248	111382001	0	0.03291	0.528614	0.067591
1085	Amp	1	111382127	111927471	0	0.032151	0.52728	0.067591
1086	Amp	1	111932927	111933401	0	0.030818	0.529897	0.069324
1087	Amp	1	111933489	111935744	0	0.032612	0.527767	0.071057
1088	Amp	1	111935822	111951752	0	0.03551	0.531861	0.07279
1089	Amp	1	111952223	111968310	0	0.032612	0.527767	0.071057
1090	Amp	1	111968346	111995855	0	0.035495	0.531776	0.07279
1091	Amp	1	111996121	112022617	0	0.032612	0.527767	0.071057
1092	Amp	1	112025050	112025854	0	0.029755	0.511103	0.071057
1093	Amp	1	112026382	112163591	0	0.030334	0.502112	0.07279
1094	Amp	1	112163596	112363995	0	0.032474	0.501852	0.074523
1095	Amp	1	112368702	112753195	0	0.030494	0.501617	0.07279
1096	Amp	1	112754875	112942794	0	0.031123	0.503451	0.076256
1097	Amp	1	112944259	112958947	0	0.029623	0.495629	0.076256
1098	Amp	1	112961996	113026874	0	0.031168	0.474802	0.081456
1099	Amp	1	113027938	113061907	0	0.029374	0.475502	0.079723
1100	Amp	1	113061928	113207042	0	0.030595	0.505448	0.083189
1101	Amp	1	113208087	113231359	0	0.030015	0.505111	0.083189
1102	Amp	1	113231492	113243181	0	0.028337	0.50958	0.081456
1103	Amp	1	113243301	113284683	0	0.027708	0.516134	0.079723
1104	Amp	1	113289591	113318902	0	0.026487	0.531036	0.079723
1105	Amp	1	113319881	113319881	0	0.024942	0.546215	0.076256
1106	Amp	1	113325701	113488979	0	0.024344	0.555724	0.074523
1107	Amp	1	113494003	113569141	0	0.027615	0.560155	0.076256
1108	Amp	1	113570197	113625158	0	0.024344	0.550189	0.074523
1109	Amp	1	113630788	113631057	0	0.0249	0.538255	0.07799
1110	Amp	1	113632670	113729465	0	0.026336	0.533716	0.079723
1111	Amp	1	113729952	113729952	0	0.027343	0.527276	0.081456
1112	Amp	1	113738095	113762492	0	0.029412	0.526182	0.083189
1113	Amp	1	113766234	113803712	0	0.029879	0.517643	0.084922
1114	Amp	1	113809084	114101270	0	0.033102	0.522079	0.086655
1115	Amp	1	114103867	114128347	0	0.035597	0.522647	0.088388
1116	Amp	1	114129003	114148759	0	0.036602	0.517475	0.090121
1117	Amp	1	114151650	114170529	0	0.035596	0.523092	0.088388
1118	Amp	1	114170737	114213300	0	0.03459	0.528479	0.086655
1119	Amp	1	114216468	114339465	0	0.043329	0.568583	0.086655
1120	Amp	1	114342617	114357230	0	0.039546	0.551222	0.086655
1121	Amp	1	114358056	114464344	0	0.040202	0.551424	0.088388
1122	Amp	1	114467106	114525030	0	0.043232	0.566143	0.088388
1123	Amp	1	114527285	114672456	0	0.040736	0.56561	0.086655
1124	Amp	1	114674339	114744225	0	0.044712	0.583855	0.086655
1125	Amp	1	114744314	114789878	0	0.031241	0.522033	0.086655
1126	Amp	1	114793492	114857263	0	0.032401	0.517095	0.088388
1127	Amp	1	114857319	114934218	0	0.033339	0.521314	0.088388
1128	Amp	1	114938697	114954541	0	0.032683	0.518362	0.088388
1129	Amp	1	114956105	115012691	0	0.03016	0.50701	0.088388
1130	Amp	1	115021450	115038110	0	0.029653	0.495515	0.088388
1131	Amp	1	115038729	115095423	0	0.030843	0.500869	0.088388
1132	Amp	1	115095793	115138882	0	0.029683	0.505483	0.086655
1133	Amp	1	115140120	115167593	0	0.021032	0.474864	0.084922
1134	Amp	1	115171117	115215593	0	0.018963	0.474865	0.083189
1135	Amp	1	115216378	115258328	0	0.022234	0.491386	0.083189
1136	Amp	1	115259165	115403117	0	0.02293	0.494224	0.084922
1137	Amp	1	115408162	115443483	0	0.023906	0.500927	0.084922
1138	Amp	1	115447442	115491713	0	0.027697	0.51699	0.086655
1139	Amp	1	115492232	115494171	0	0.024426	0.501978	0.086655
1140	Amp	1	115495773	115544106	0	0.02813	0.5092	0.088388
1141	Amp	1	115547733	115617890	0	0.029738	0.506504	0.090121
1142	Amp	1	115622077	115649438	0	0.025482	0.498278	0.090121
1143	Amp	1	115650138	115665212	0	0.024705	0.507685	0.090121
1144	Amp	1	115668447	115672544	0	0.022254	0.50562	0.088388
1145	Amp	1	115675042	115703278	0	0.03466	0.561439	0.088388
1146	Amp	1	115709145	115742032	0	0.035253	0.564108	0.088388
1147	Amp	1	115745955	115878948	0	0.032612	0.552225	0.088388
1148	Amp	1	115879537	115904041	0	0.030201	0.550324	0.086655
1149	Amp	1	115906026	116200139	0	0.031062	0.543409	0.088388
1150	Amp	1	116206560	116208610	0	0.033472	0.536931	0.091854
1151	Amp	1	116209313	116302009	0	0.033986	0.5298	0.093588
1152	Amp	1	116302530	116362780	0	0.03477	0.535195	0.095321
1153	Amp	1	116363729	116386233	0	0.03236	0.534866	0.093588
1154	Amp	1	116386713	116465901	0	0.031528	0.526776	0.093588
1155	Amp	1	116469777	116509197	0	0.040165	0.563478	0.093588
1156	Amp	1	116511534	116525225	0	0.039382	0.573038	0.090121
1157	Amp	1	116527793	116548108	0	0.041532	0.571535	0.091854
1158	Amp	1	116551600	116708941	0	0.042153	0.56359	0.093588
1159	Amp	1	116709685	116790857	0	0.043861	0.543438	0.10052
1160	Amp	1	116795104	116802566	0	0.035224	0.512161	0.102253
1161	Amp	1	116808457	116841677	0	0.037267	0.511441	0.103986
1162	Amp	1	116842883	116881008	0	0.037862	0.505293	0.105719
1163	Amp	1	116883820	116951845	0	0.040613	0.507326	0.107452
1164	Amp	1	116953482	117112236	0	0.043644	0.518989	0.107452
1165	Amp	1	117113466	117113466	0	0.048292	0.522903	0.110919
1166	Amp	1	117115233	117172404	0	0.047431	0.528065	0.109185
1167	Amp	1	117172419	117184745	0	0.04852	0.532575	0.109185
1168	Amp	1	117185870	117336444	0	0.049883	0.529203	0.110919
1169	Amp	1	117340625	117370397	0	0.047132	0.527582	0.109185
1170	Amp	1	117371020	117533917	0	0.056964	0.562856	0.109185
1171	Amp	1	117540280	117711015	0	0.05492	0.558588	0.110919
1172	Amp	1	117711587	117776682	0	0.055685	0.552693	0.112652
1173	Amp	1	117784228	117857732	0	0.052654	0.541698	0.112652
1174	Amp	1	117864022	117938653	0	0.050946	0.53791	0.112652
1175	Amp	1	117964606	118011424	0	0.037627	0.509234	0.112652
1176	Amp	1	118012883	118041182	0	0.03503	0.503623	0.114385
1177	Amp	1	118043611	118096554	0	0.047281	0.550158	0.116118
1178	Amp	1	118098195	118108431	0	0.049816	0.559486	0.116118
1179	Amp	1	118114351	118125670	0	0.0477	0.552238	0.116118
1180	Amp	1	118129161	118154456	0	0.044543	0.54963	0.114385
1181	Amp	1	118155027	118212766	0	0.048191	0.557928	0.114385
1182	Amp	1	118239162	118323210	0	0.050379	0.560491	0.116118
1183	Amp	1	118323364	118340673	0	0.049785	0.559729	0.117851
1184	Amp	1	118340808	118355103	0	0.050785	0.554944	0.119584
1185	Amp	1	118355440	118484811	0	0.051341	0.556792	0.119584
1186	Amp	1	118486443	118502932	0	0.058909	0.571726	0.12305
1187	Amp	1	118505558	118578708	0	0.051896	0.549058	0.12305
1188	Amp	1	118588329	118728785	0	0.051341	0.554882	0.121317
1189	Amp	1	118732964	118774144	0	0.06277	0.594651	0.121317
1190	Amp	1	118774165	118820108	0.050473	0.066043	0.603577	0.121317
1191	Amp	1	118822299	118827196	0	0.05792	0.581512	0.121317
1192	Amp	1	118837324	118901864	0	0.054273	0.569557	0.121317
1193	Amp	1	118903378	118936205	0	0.052058	0.562296	0.121317
1194	Amp	1	118936711	118970259	0	0.052937	0.565176	0.121317
1195	Amp	1	118970290	119028642	0	0.051914	0.569959	0.119584
1196	Amp	1	119035302	119039825	0	0.053548	0.565282	0.12305
1197	Amp	1	119040719	119081540	0	0.058224	0.579925	0.124783
1198	Amp	1	119082344	119105323	0	0.060654	0.59132	0.126516
1199	Amp	1	119115201	119189724	0.024438	0.064936	0.608364	0.12825
1200	Amp	1	119191969	119282854	0	0.062357	0.608313	0.126516
1201	Amp	1	119282867	119403528	0.001323	0.064038	0.597579	0.131716
1202	Amp	1	119403575	119413100	0.050473	0.066154	0.60397	0.131716
1203	Amp	1	119416666	119475138	0.019169	0.064792	0.607799	0.129983
1204	Amp	1	119475331	119491226	0.040093	0.065723	0.6025	0.133449
1205	Amp	1	119494326	119682349	0.065715	0.066842	0.605834	0.133449
1206	Amp	1	119683689	119801421	0.015369	0.064653	0.605361	0.133449
1207	Amp	1	119801482	119853088	0.001323	0.063891	0.609325	0.133449
1208	Amp	1	119855157	119864614	0	0.062012	0.616305	0.131716
1209	Amp	1	119867080	119884026	0	0.06248	0.609994	0.133449
1210	Amp	1	119890454	119904099	0.060686	0.066542	0.61724	0.135182
1211	Amp	1	119906441	119952136	0.107017	0.06843	0.619183	0.136915
1212	Amp	1	119952779	119955627	0.094967	0.067969	0.613561	0.138648
1213	Amp	1	119955930	119965901	0.170723	0.071181	0.620959	0.140381
1214	Amp	1	119967232	119978092	0.14896	0.070249	0.61438	0.142114
1215	Amp	1	119979030	119979137	0.210594	0.072728	0.611456	0.149047
1216	Amp	1	119979978	119979978	0.246818	0.074218	0.591509	0.159445
1217	Amp	1	119981279	119981279	0.112543	0.068777	0.580301	0.168111
1218	Amp	1	119981332	119981332	0	0.059708	0.557686	0.176776
1219	Amp	1	119984738	119984738	0	0.062899	0.562279	0.195841
1220	Amp	1	119984772	119984772	0.386426	0.079444	0.632755	0.310225
1221	Amp	1	146716041	146716041	1.252022	0.103168	0.785775	0.563258
1222	Amp	1	149906351	149906351	2.614791	0.131217	0.787664	0.629116
1223	Amp	1	149909846	149909846	2.812598	0.134896	0.777468	0.672444
1224	Amp	1	149910462	149910462	2.929372	0.137087	0.775212	0.67591
1225	Amp	1	149913375	149914031	2.882945	0.136218	0.767701	0.686308
1226	Amp	1	149918981	149918981	3.009724	0.138738	0.766005	0.696707
1227	Amp	1	149927059	149928056	3.852343	0.15382	0.772354	0.701906
1228	Amp	1	149936215	149966299	4.223463	0.160137	0.775345	0.70364
1229	Amp	1	149966820	149966820	4.090086	0.158077	0.772225	0.708839
1230	Amp	1	149966973	149972350	4.3738	0.162479	0.774695	0.708839
1231	Amp	1	149975408	149991322	4.47072	0.163943	0.77343	0.712305
1232	Amp	1	149993982	150002511	4.838749	0.169761	0.773576	0.715771
1233	Amp	1	150004041	150057994	4.69701	0.167611	0.774276	0.715771
1234	Amp	1	150058787	150071479	4.3738	0.162588	0.772748	0.715771
1235	Amp	1	150077351	150086641	4.499013	0.164564	0.773847	0.715771
1236	Amp	1	150086810	150131878	4.5989	0.166053	0.77282	0.717504
1237	Amp	1	150147495	150147495	4.640474	0.166715	0.773527	0.717504
1238	Amp	1	150148513	150176837	4.768128	0.168532	0.772702	0.719237
1239	Amp	1	150177309	150315150	4.683031	0.167201	0.772194	0.719237
1240	Amp	1	150315443	150520671	4.264196	0.160834	0.770518	0.717504
1241	Amp	1	150522687	150533787	4.209693	0.16002	0.769687	0.717504
1242	Amp	1	150544285	150593647	4.924414	0.171005	0.775409	0.719237
1243	Amp	1	150597511	150645155	5.02373	0.172564	0.776442	0.719237
1244	Amp	1	150646156	150700888	4.91152	0.170772	0.777102	0.719237
1245	Amp	1	150703805	150704541	4.882872	0.170304	0.777718	0.719237
1246	Amp	1	150705243	150765897	4.69701	0.167616	0.776232	0.719237
1247	Amp	1	150766223	150838819	4.116393	0.158422	0.770631	0.719237
1248	Amp	1	150838949	150883915	4.541384	0.165222	0.774391	0.719237
1249	Amp	1	150886666	150886666	4.47072	0.163994	0.773575	0.719237
1250	Amp	1	150889547	150891045	4.429656	0.163437	0.773267	0.719237
1251	Amp	1	150893765	150979001	4.116393	0.158439	0.772328	0.717504
1252	Amp	1	150979329	151002131	4.090086	0.157984	0.775122	0.714038
1253	Amp	1	151006598	151070549	3.874391	0.154297	0.77359	0.714038
1254	Amp	1	151070735	151070735	3.839479	0.153708	0.77461	0.712305
1255	Amp	1	151073507	151099783	3.788687	0.152668	0.774029	0.712305
1256	Amp	1	151115703	151115703	3.471122	0.147164	0.76978	0.714038
1257	Amp	1	151116579	151198313	3.103562	0.140455	0.768256	0.714038
1258	Amp	1	151201646	151222856	2.278531	0.124817	0.761228	0.712305
1259	Amp	1	151226395	151288420	2.213223	0.12352	0.760469	0.712305
1260	Amp	1	151293382	151358828	2.158817	0.122312	0.760878	0.712305
1261	Amp	1	151359311	151359541	1.994915	0.119005	0.758459	0.712305
1262	Amp	1	151436260	151437026	1.96212	0.118521	0.758188	0.712305
1263	Amp	1	151437367	151498967	2.158817	0.122275	0.763716	0.712305
1264	Amp	1	151500420	151501628	2.256542	0.124291	0.761531	0.717504
1265	Amp	1	151504717	151504963	2.278531	0.124792	0.760601	0.719237
1266	Amp	1	151506001	151506001	2.300463	0.125265	0.759071	0.720971
1267	Amp	1	151507898	151529261	2.345513	0.126034	0.759496	0.720971
1268	Amp	1	151536508	151557459	2.26699	0.124472	0.758634	0.720971
1269	Amp	1	151563440	151563440	1.512549	0.10905	0.751204	0.720971
1270	Amp	1	151564677	151568809	1.445847	0.10755	0.751541	0.720971
1271	Amp	1	151569239	151578125	1.531891	0.109644	0.753538	0.720971
1272	Amp	1	151578197	151630186	1.416817	0.106982	0.754578	0.720971
1273	Amp	1	151633929	151686595	1.472629	0.108332	0.757891	0.720971
1274	Amp	1	151686890	151689637	1.378521	0.106141	0.758794	0.719237
1275	Amp	1	151690251	151759607	1.261401	0.103498	0.759298	0.719237
1276	Amp	1	151760224	151768525	1.290368	0.104016	0.760464	0.719237
1277	Amp	1	151770667	151770667	1.348715	0.105476	0.761272	0.719237
1278	Amp	1	151770799	151770799	1.378521	0.10598	0.761623	0.719237
1279	Amp	1	151772452	151782846	1.280185	0.104007	0.762044	0.719237
1280	Amp	1	151789185	151845522	0.891602	0.094559	0.75682	0.719237
1281	Amp	1	151847822	151901561	0.995635	0.097245	0.758803	0.722704
1282	Amp	1	151904006	151904006	1.178324	0.101501	0.761206	0.722704
1283	Amp	1	151904502	151938778	1.243254	0.103122	0.760275	0.724437
1284	Amp	1	151942422	151998169	1.270711	0.103621	0.761688	0.722704
1285	Amp	1	151999021	152033246	1.197658	0.102	0.763902	0.719237
1286	Amp	1	152033856	152053260	0.977077	0.096665	0.760565	0.720971
1287	Amp	1	152056085	152175092	0.995635	0.097168	0.76099	0.720971
1288	Amp	1	152176337	152183308	1.023539	0.097826	0.760736	0.722704
1289	Amp	1	152185315	152252565	1.290368	0.104118	0.76237	0.724437
1290	Amp	1	152255234	152258902	1.149583	0.100906	0.760452	0.724437
1291	Amp	1	152263498	152288336	0.891602	0.094614	0.758813	0.722704
1292	Amp	1	152295561	152295561	1.041205	0.098318	0.757559	0.72617
1293	Amp	1	152298587	152356893	1.121584	0.10028	0.758657	0.72617
1294	Amp	1	152360241	152372861	1.168655	0.101393	0.759267	0.72617
1295	Amp	1	152375887	152381528	1.102589	0.099834	0.758413	0.72617
1296	Amp	1	152382758	152382758	1.131695	0.100326	0.758683	0.72617
1297	Amp	1	152393104	152437590	0.857296	0.093628	0.755014	0.72617
1298	Amp	1	152437990	152440790	1.112463	0.099927	0.758751	0.72617
1299	Amp	1	152440885	152459649	1.149583	0.100798	0.759272	0.72617
1300	Amp	1	152461715	152469813	0.915698	0.095167	0.75737	0.72617
1301	Amp	1	152469836	152493458	0.941704	0.095774	0.75785	0.72617
1302	Amp	1	152494491	152535661	0.891602	0.094659	0.759517	0.724437
1303	Amp	1	152536086	152640996	0.840289	0.093198	0.759171	0.724437
1304	Amp	1	152641155	152667725	0.873678	0.094095	0.761096	0.722704
1305	Amp	1	152668473	152668473	0.840289	0.093198	0.763034	0.720971
1306	Amp	1	152668698	152726279	0.823771	0.092725	0.764574	0.719237
1307	Amp	1	152728542	152752479	0.848692	0.093436	0.762119	0.722704
1308	Amp	1	152753153	152766750	0.873678	0.094109	0.762489	0.722704
1309	Amp	1	152767131	152825329	0.751221	0.090799	0.760498	0.722704
1310	Amp	1	152828698	152828698	0.882843	0.094413	0.762486	0.722704
1311	Amp	1	152838707	152864958	1.093834	0.099527	0.765313	0.722704
1312	Amp	1	152867032	152882330	1.159209	0.101179	0.766346	0.722704
1313	Amp	1	152883608	152883608	0.950886	0.096064	0.763532	0.722704
1314	Amp	1	152883826	152900077	0.807647	0.092451	0.761537	0.722704
1315	Amp	1	152901969	152930644	0.959607	0.096254	0.764745	0.720971
1316	Amp	1	152933231	152933231	0.857296	0.093697	0.76507	0.719237
1317	Amp	1	152934101	152972410	0.831947	0.092987	0.764677	0.719237
1318	Amp	1	152972461	152992003	0.807647	0.092319	0.764308	0.719237
1319	Amp	1	152992224	153018584	0.758088	0.091033	0.762057	0.720971
1320	Amp	1	153028502	153080915	0.742723	0.090549	0.762788	0.719237
1321	Amp	1	153083902	153127918	0.697374	0.089436	0.762112	0.719237
1322	Amp	1	153128018	153128018	0.494792	0.083119	0.758593	0.719237
1323	Amp	1	153128035	153131706	0.576183	0.085755	0.758413	0.720971
1324	Amp	1	153131776	153133389	0.774648	0.091469	0.761565	0.720971
1325	Amp	1	153133819	153160508	0.72817	0.090218	0.760875	0.720971
1326	Amp	1	153161611	153206707	0.751221	0.090873	0.759411	0.722704
1327	Amp	1	153207447	153207621	0.72817	0.090265	0.76073	0.720971
1328	Amp	1	153209815	153251073	0.667587	0.088388	0.760508	0.720971
1329	Amp	1	153251646	153256299	0.720659	0.089979	0.759687	0.722704
1330	Amp	1	153257097	153259007	0.644502	0.087842	0.759341	0.722704
1331	Amp	1	153272606	153274022	0.563096	0.085156	0.75952	0.720971
1332	Amp	1	153275182	153282541	0.583752	0.085968	0.760195	0.720971
1333	Amp	1	153282939	153314040	0.563096	0.085313	0.762994	0.717504
1334	Amp	1	153314540	153321922	0.515676	0.083766	0.7611	0.717504
1335	Amp	1	153321996	153322177	0.576183	0.08566	0.761956	0.717504
1336	Amp	1	153329051	153342229	0.681869	0.088924	0.763765	0.717504
1337	Amp	1	153342346	153399125	0.667587	0.088406	0.763478	0.717504
1338	Amp	1	153399371	153402908	0.644502	0.087901	0.763198	0.717504
1339	Amp	1	153405027	153459085	0.667587	0.088445	0.761432	0.719237
1340	Amp	1	153459146	153490450	0.563096	0.085182	0.758361	0.719237
1341	Amp	1	153490561	153490561	0.543344	0.084679	0.757489	0.719237
1342	Amp	1	153493819	153573458	0.463534	0.081892	0.757152	0.719237
1343	Amp	1	153584088	153693134	0.47716	0.082428	0.756919	0.719237
1344	Amp	1	153699567	153796506	0.529451	0.084208	0.756532	0.717504
1345	Amp	1	153800463	153874357	0.515676	0.083672	0.754989	0.719237
1346	Amp	1	153875833	153887765	0.689884	0.089086	0.756814	0.720971
1347	Amp	1	153890003	153928787	0.609133	0.086777	0.757326	0.719237
1348	Amp	1	153932130	153947928	0.774648	0.091618	0.758341	0.720971
1349	Amp	1	153948693	154019235	0.720659	0.089925	0.75934	0.720971
1350	Amp	1	154019265	154086400	0.79909	0.092167	0.76047	0.720971
1351	Amp	1	154088004	154190635	0.873678	0.094171	0.76126	0.722704
1352	Amp	1	154195150	154224650	0.995635	0.097264	0.761586	0.724437
1353	Amp	1	154224756	154266807	1.131695	0.10049	0.763357	0.724437
1354	Amp	1	154274778	154335486	0.781972	0.091653	0.762643	0.724437
1355	Amp	1	154336165	154386703	1.075952	0.099217	0.76681	0.724437
1356	Amp	1	154387350	154417346	0.807647	0.092381	0.762967	0.724437
1357	Amp	1	154424769	154424784	1.378521	0.106072	0.768644	0.72617
1358	Amp	1	154425354	154446403	1.290368	0.104068	0.769134	0.724437
1359	Amp	1	154449905	154563051	1.463774	0.107993	0.771289	0.724437
1360	Amp	1	154563091	154566641	1.563118	0.110238	0.770515	0.724437
1361	Amp	1	154572360	154650092	1.645511	0.111901	0.771428	0.724437
1362	Amp	1	154651697	154689862	2.435195	0.127837	0.778362	0.72617
1363	Amp	1	154693941	154745413	2.468223	0.128507	0.778733	0.72617
1364	Amp	1	154745432	154847591	2.52589	0.129445	0.777396	0.727903
1365	Amp	1	154849733	154860921	2.837591	0.135452	0.779157	0.729636
1366	Amp	1	154870871	154881541	2.871582	0.135995	0.780017	0.729636
1367	Amp	1	154882579	154951763	2.776997	0.134332	0.778983	0.729636
1368	Amp	1	154952953	154952953	2.637742	0.13162	0.777069	0.729636
1369	Amp	1	154964227	154977746	2.837591	0.135306	0.779255	0.729636
1370	Amp	1	154982928	154989340	2.882945	0.136284	0.778118	0.731369
1371	Amp	1	154992265	154993514	2.661431	0.132028	0.77495	0.731369
1372	Amp	1	154995890	154999851	2.514205	0.129252	0.773441	0.731369
1373	Amp	1	155011992	155044688	2.860424	0.135834	0.77702	0.731369
1374	Amp	1	155045450	155077709	2.837591	0.135291	0.775794	0.731369
1375	Amp	1	155090669	155094807	2.235168	0.123868	0.771247	0.729636
1376	Amp	1	155106045	155147675	2.379392	0.12661	0.772742	0.729636
1377	Amp	1	155151091	155159197	2.502083	0.129089	0.772428	0.731369
1378	Amp	1	155163749	155168172	2.213223	0.123375	0.769212	0.731369
1379	Amp	1	155173638	155176826	2.311329	0.125295	0.768468	0.733102
1380	Amp	1	155182632	155262283	1.984015	0.118969	0.765037	0.733102
1381	Amp	1	155264807	155269959	1.940776	0.117992	0.766669	0.731369
1382	Amp	1	155270312	155315261	1.748606	0.114067	0.763711	0.731369
1383	Amp	1	155317731	155333027	1.583409	0.110529	0.7617	0.733102
1384	Amp	1	155333790	155335328	1.624655	0.111585	0.762273	0.733102
1385	Amp	1	155336546	155348517	1.197658	0.101975	0.758854	0.731369
1386	Amp	1	155349209	155396615	1.168655	0.101247	0.75806	0.731369
1387	Amp	1	155398680	155405570	0.563096	0.085311	0.751175	0.729636
1388	Amp	1	155408810	155542642	0.644502	0.087753	0.752506	0.729636
1389	Amp	1	155546401	155641923	0.583752	0.085833	0.75275	0.727903
1390	Amp	1	155643858	155646487	0.550755	0.084895	0.753343	0.72617
1391	Amp	1	155649237	155649237	0.373599	0.078888	0.751741	0.724437
1392	Amp	1	155655811	155666664	0.515676	0.083622	0.752897	0.72617
1393	Amp	1	155667097	155761313	0.431198	0.080986	0.753148	0.724437
1394	Amp	1	155763607	155778679	0.4115	0.080317	0.753485	0.724437
1395	Amp	1	155779616	155813579	0.362016	0.078423	0.753507	0.722704
1396	Amp	1	155817414	155900727	0.373599	0.078942	0.754798	0.720971
1397	Amp	1	155903523	155923806	0.329205	0.077351	0.754504	0.720971
1398	Amp	1	155926088	155967566	0.287738	0.075988	0.753667	0.720971
1399	Amp	1	155973008	156009242	0.417873	0.080442	0.756206	0.720971
1400	Amp	1	156011698	156017008	0.362016	0.078591	0.755186	0.720971
1401	Amp	1	156022462	156031555	0.246818	0.074137	0.752729	0.720971
1402	Amp	1	156032988	156039096	0.233782	0.073593	0.754078	0.719237
1403	Amp	1	156047611	156161826	0.170723	0.071114	0.754395	0.717504
1404	Amp	1	156165450	156180434	0.079652	0.067402	0.754288	0.715771
1405	Amp	1	156184308	156321235	0.215608	0.072952	0.757371	0.715771
1406	Amp	1	156321574	156386688	0.133193	0.069597	0.756021	0.717504
1407	Amp	1	156397646	156429151	0.170723	0.07122	0.758345	0.717504
1408	Amp	1	156441358	156450669	0.056211	0.066429	0.75614	0.717504
1409	Amp	1	156451132	156453066	0	0.062626	0.75427	0.717504
1410	Amp	1	156455196	156461549	0	0.063614	0.755767	0.717504
1411	Amp	1	156462367	156478149	0.094967	0.068107	0.758842	0.717504
1412	Amp	1	156489907	156513264	0.069848	0.067031	0.760576	0.715771
1413	Amp	1	156521187	156593291	0.050473	0.066043	0.761014	0.715771
1414	Amp	1	156594021	156612355	0.010261	0.064419	0.760113	0.715771
1415	Amp	1	156612728	156737983	0.056211	0.066265	0.761138	0.715771
1416	Amp	1	156741003	156770863	0	0.060715	0.757788	0.715771
1417	Amp	1	156780361	156782789	0	0.062563	0.757252	0.717504
1418	Amp	1	156788135	156810923	0.056211	0.066437	0.758194	0.719237
1419	Amp	1	156815564	156820205	0.08435	0.067587	0.758879	0.719237
1420	Amp	1	156824556	156831013	0.107017	0.068472	0.758301	0.720971
1421	Amp	1	156831449	156860426	0.118001	0.068921	0.759128	0.720971
1422	Amp	1	156862987	156999474	0.069848	0.067072	0.760445	0.719237
1423	Amp	1	157000104	157041533	0.056211	0.06634	0.759471	0.720971
1424	Amp	1	157041803	157069645	0.015369	0.064529	0.759906	0.719237
1425	Amp	1	157069670	157088632	0.107017	0.068607	0.762537	0.719237
1426	Amp	1	157090101	157226910	0.089561	0.06793	0.762163	0.719237
1427	Amp	1	157228147	157247031	0.056211	0.066274	0.762381	0.719237
1428	Amp	1	157247284	157471861	0	0.062196	0.760126	0.719237
1429	Amp	1	157477428	157486927	0	0.060707	0.760154	0.720971
1430	Amp	1	157487136	157487136	0	0.062337	0.759626	0.722704
1431	Amp	1	157491916	157571164	0.001323	0.064008	0.762938	0.720971
1432	Amp	1	157571300	157785419	0	0.06275	0.76449	0.717504
1433	Amp	1	157789921	157847627	0	0.060533	0.763039	0.717504
1434	Amp	1	157848884	157989825	0	0.060014	0.762567	0.717504
1435	Amp	1	157993139	158069635	0	0.058343	0.760193	0.717504
1436	Amp	1	158070977	158083176	0	0.063605	0.761659	0.719237
1437	Amp	1	158084709	158115775	0.079652	0.067355	0.763844	0.719237
1438	Amp	1	158120861	158200394	0.065715	0.066855	0.763085	0.719237
1439	Amp	1	158201288	158274869	0.029031	0.065225	0.764787	0.717504
1440	Amp	1	158276808	158380337	0	0.059964	0.761184	0.719237
1441	Amp	1	158382692	158401983	0	0.063527	0.761613	0.720971
1442	Amp	1	158405816	158418644	0	0.058793	0.759165	0.720971
1443	Amp	1	158422773	158497936	0	0.056931	0.758138	0.720971
1444	Amp	1	158498370	158518070	0	0.056482	0.757348	0.720971
1445	Amp	1	158528732	158541869	0	0.05982	0.759453	0.722704
1446	Amp	1	158542020	158544217	0.001323	0.064004	0.760131	0.722704
1447	Amp	1	158544304	158544407	0	0.059511	0.755199	0.722704
1448	Amp	1	158544421	158544421	0	0.050367	0.742125	0.720971
1449	Amp	1	158544436	158544436	0	0.049217	0.722606	0.720971
1450	Amp	1	158544724	158545154	0	0.043585	0.708352	0.719237
1451	Amp	1	158545168	158545295	0	0.040248	0.707814	0.719237
1452	Amp	1	158580102	158650857	0	0.049231	0.758785	0.722704
1453	Amp	1	158651233	158794775	0	0.051295	0.761829	0.724437
1454	Amp	1	158794822	158795142	0	0.053222	0.764061	0.724437
1455	Amp	1	158799016	158866716	0	0.049313	0.761724	0.724437
1456	Amp	1	158871470	158951561	0	0.051103	0.76292	0.724437
1457	Amp	1	158951884	158986622	0	0.052833	0.763921	0.724437
1458	Amp	1	158997602	158997602	0	0.05345	0.765827	0.722704
1459	Amp	1	159000282	159068194	0	0.050947	0.764449	0.722704
1460	Amp	1	159070235	159224476	0	0.053926	0.766207	0.724437
1461	Amp	1	159224622	159248028	0	0.051951	0.765275	0.724437
1462	Amp	1	159251489	159275184	0	0.054763	0.765303	0.72617
1463	Amp	1	159276545	159279025	0	0.06305	0.768046	0.727903
1464	Amp	1	159286876	159334014	0.069848	0.067078	0.772002	0.72617
1465	Amp	1	159334337	159406113	0.1237	0.069063	0.773136	0.72617
1466	Amp	1	159406165	159584728	0.14896	0.070251	0.773973	0.72617
1467	Amp	1	159588468	159598058	0.204831	0.072499	0.77367	0.727903
1468	Amp	1	159598132	159629024	0.17597	0.071319	0.772565	0.729636
1469	Amp	1	159632634	159641030	0.848692	0.093431	0.78286	0.731369
1470	Amp	1	159644196	159654647	1.032525	0.098075	0.785439	0.731369
1471	Amp	1	159654967	159655385	0.857296	0.093738	0.78308	0.731369
1472	Amp	1	159655509	159677005	0.181932	0.071626	0.774265	0.727903
1473	Amp	1	159677134	159689641	0.282828	0.075585	0.776427	0.727903
1474	Amp	1	159692839	159703306	0.529451	0.084086	0.778963	0.727903
1475	Amp	1	159703819	159709846	0.622604	0.087219	0.78316	0.727903
1476	Amp	1	159710195	159752266	0.583752	0.085862	0.782197	0.727903
1477	Amp	1	159752445	159825688	0.667587	0.088568	0.783732	0.727903
1478	Amp	1	159832179	159847698	0.450702	0.081489	0.77891	0.729636
1479	Amp	1	159850236	159884105	0.424557	0.080756	0.778511	0.729636
1480	Amp	1	159885969	159905665	0.482379	0.082562	0.779108	0.729636
1481	Amp	1	159910870	159950929	0.322897	0.077135	0.776149	0.729636
1482	Amp	1	159967032	160034011	0.251218	0.074429	0.774442	0.729636
1483	Amp	1	160035807	160092169	0.264858	0.074935	0.775519	0.729636
1484	Amp	1	160094628	160149919	0.251218	0.074429	0.774425	0.729636
1485	Amp	1	160150359	160193082	0.210594	0.072623	0.773441	0.729636
1486	Amp	1	160193847	160228410	0.241616	0.074012	0.770438	0.731369
1487	Amp	1	160229017	160255473	0.204831	0.07236	0.76941	0.731369
1488	Amp	1	160255967	160270643	0.287738	0.075916	0.771194	0.731369
1489	Amp	1	160273935	160300053	0.316877	0.076991	0.77188	0.731369
1490	Amp	1	160303902	160359846	0.386426	0.07933	0.773189	0.731369
1491	Amp	1	160360133	160379910	0.271552	0.075284	0.76886	0.731369
1492	Amp	1	160379962	160402319	0.329205	0.077383	0.771007	0.731369
1493	Amp	1	160402556	160413260	0.379885	0.079139	0.771961	0.731369
1494	Amp	1	160413894	160423211	0.4115	0.08013	0.772148	0.731369
1495	Amp	1	160428562	160509343	0.386426	0.079325	0.771711	0.731369
1496	Amp	1	160517745	160578473	0.482379	0.082723	0.773757	0.729636
1497	Amp	1	160578937	160652624	0.616549	0.086895	0.775964	0.729636
1498	Amp	1	160656246	160690484	0.569771	0.085506	0.776784	0.729636
1499	Amp	1	160690509	160690667	0.500841	0.083167	0.775266	0.729636
1500	Amp	1	160698619	160705312	0.924746	0.095533	0.782557	0.729636
1501	Amp	1	160707748	160711725	0.563096	0.08525	0.776704	0.729636
1502	Amp	1	160716704	160781315	0.500841	0.083167	0.775407	0.729636
1503	Amp	1	160789428	160789880	0.704849	0.089472	0.779109	0.729636
1504	Amp	1	160795410	160796352	0.915698	0.095121	0.779974	0.731369
1505	Amp	1	160800725	160833928	1.058188	0.098645	0.780115	0.733102
1506	Amp	1	160833945	160917506	1.032525	0.098027	0.779629	0.733102
1507	Amp	1	160917791	161234748	1.23519	0.102717	0.783583	0.731369
1508	Amp	1	161238513	161287888	1.329472	0.105053	0.785764	0.734835
1509	Amp	1	161292622	161347992	0.950886	0.095984	0.780856	0.734835
1510	Amp	1	161348959	161397337	0.86541	0.093884	0.779589	0.734835
1511	Amp	1	161401195	161439440	1.041205	0.098247	0.782227	0.734835
1512	Amp	1	161476338	161476341	0.630438	0.087348	0.777978	0.731369
1513	Amp	1	161686708	161686708	0.899693	0.094731	0.781559	0.733102
1514	Amp	1	161688868	161700551	0.735486	0.090368	0.779186	0.733102
1515	Amp	1	161702205	161711762	0.882843	0.094384	0.781643	0.733102
1516	Amp	1	161712651	161719600	0.636464	0.087564	0.780119	0.733102
1517	Amp	1	161720430	161725067	0.508568	0.083549	0.778269	0.733102
1518	Amp	1	161730889	161732594	0.463534	0.081889	0.779624	0.731369
1519	Amp	1	161732920	161741462	0.508568	0.083422	0.777647	0.734835
1520	Amp	1	161743431	161811410	0.576183	0.085614	0.779161	0.734835
1521	Amp	1	161816359	161861196	0.529451	0.084081	0.78006	0.734835
1522	Amp	1	161864381	161864656	0.543344	0.084559	0.782308	0.734835
1523	Amp	1	161864805	161911507	0.622604	0.08712	0.783698	0.734835
1524	Amp	1	161921766	161943757	0.689884	0.089153	0.786114	0.734835
1525	Amp	1	161945597	161966998	0.557122	0.084981	0.783844	0.734835
1526	Amp	1	161967392	161967392	0.487495	0.08279	0.783157	0.734835
1527	Amp	1	161967834	162038289	0.4115	0.080228	0.782188	0.734835
1528	Amp	1	162038511	162045950	0.500841	0.083318	0.784567	0.734835
1529	Amp	1	162046084	162092592	0.569771	0.085523	0.78576	0.734835
1530	Amp	1	162092778	162146250	0.583752	0.085985	0.786101	0.734835
1531	Amp	1	162148165	162151430	0.660254	0.088249	0.78909	0.736568
1532	Amp	1	162152029	162159627	0.720659	0.090095	0.790167	0.736568
1533	Amp	1	162159756	162170478	0.660254	0.088366	0.789233	0.736568
1534	Amp	1	162170546	162182887	0.720659	0.090019	0.79131	0.736568
1535	Amp	1	162183319	162199376	0.602643	0.08652	0.789624	0.736568
1536	Amp	1	162199478	162203587	0.536238	0.084315	0.788534	0.736568
1537	Amp	1	162203605	162241744	0.550755	0.084831	0.788813	0.736568
1538	Amp	1	162242826	162303677	0.457501	0.081698	0.787706	0.736568
1539	Amp	1	162306642	162326048	0.399144	0.079833	0.7867	0.736568
1540	Amp	1	162328022	162340523	0.311747	0.076743	0.784742	0.736568
1541	Amp	1	162340795	162386680	0.4115	0.080149	0.78658	0.736568
1542	Amp	1	162387993	162399384	0.379885	0.079073	0.786127	0.738302
1543	Amp	1	162399620	162407466	0.246818	0.074061	0.782855	0.738302
1544	Amp	1	162407526	162521519	0.187449	0.071797	0.781635	0.738302
1545	Amp	1	162526962	162766573	0.19964	0.072265	0.78205	0.738302
1546	Amp	1	162766587	162800857	0.153838	0.070379	0.781213	0.736568
1547	Amp	1	162803724	162803724	0.164935	0.07092	0.781708	0.736568
1548	Amp	1	162811997	162884873	0.089561	0.067761	0.780155	0.736568
1549	Amp	1	162888845	163114900	0.143787	0.070036	0.781726	0.736568
1550	Amp	1	163115720	163164150	0.010261	0.064386	0.779076	0.736568
1551	Amp	1	163165249	163295539	0	0.062112	0.77775	0.736568
1552	Amp	1	163306262	163312192	0	0.063495	0.776696	0.740035
1553	Amp	1	163312568	163324694	0.015369	0.064663	0.777431	0.740035
1554	Amp	1	163324738	163336446	0.005328	0.064148	0.776971	0.740035
1555	Amp	1	163336777	163380030	0.040093	0.065667	0.777856	0.740035
1556	Amp	1	163382346	163413346	0.094967	0.068041	0.779147	0.740035
1557	Amp	1	163413602	163414403	0.040093	0.065667	0.778026	0.740035
1558	Amp	1	163415319	163471496	0.015369	0.064499	0.777398	0.740035
1559	Amp	1	163475434	163604938	0.079652	0.067353	0.777125	0.741768
1560	Amp	1	163605734	163625473	0.128324	0.069413	0.77755	0.741768
1561	Amp	1	163625805	163646468	0.222041	0.073166	0.7796	0.741768
1562	Amp	1	163646961	163662937	0.271552	0.075191	0.780686	0.741768
1563	Amp	1	163664732	163695228	0.4115	0.080157	0.783478	0.741768
1564	Amp	1	163696755	163700550	0.529451	0.08412	0.785603	0.741768
1565	Amp	1	163701670	163773211	0.463534	0.08206	0.784498	0.741768
1566	Amp	1	163773527	163782196	0.508568	0.083414	0.783647	0.743501
1567	Amp	1	163833292	163846190	0.697374	0.089294	0.785056	0.745234
1568	Amp	1	163846406	163859605	0.536238	0.084328	0.782406	0.745234
1569	Amp	1	163860112	163890599	0.424557	0.080576	0.780403	0.745234
1570	Amp	1	163891515	163943238	0.563096	0.085282	0.782915	0.745234
1571	Amp	1	163943286	163999344	0.522881	0.084022	0.782884	0.743501
1572	Amp	1	164003662	164109110	0.494792	0.082963	0.784186	0.741768
1573	Amp	1	164109340	164202551	0.431198	0.080899	0.781293	0.741768
1574	Amp	1	164203195	164369190	0.450702	0.081586	0.783392	0.741768
1575	Amp	1	164369495	164479165	0.47716	0.082322	0.782144	0.743501
1576	Amp	1	164480512	164562863	0.576183	0.085609	0.783946	0.743501
1577	Amp	1	164563088	164602346	0.494792	0.083101	0.78243	0.743501
1578	Amp	1	164609415	164746339	0.47716	0.082365	0.783645	0.741768
1579	Amp	1	164750903	164815216	0.379885	0.079087	0.782853	0.740035
1580	Amp	1	164816593	164827125	0.457501	0.081771	0.784364	0.740035
1581	Amp	1	164829854	164847719	0.636464	0.087648	0.788181	0.740035
1582	Amp	1	164848050	164933991	0.609133	0.086747	0.789633	0.738302
1583	Amp	1	164936106	164944457	0.622604	0.087193	0.788049	0.740035
1584	Amp	1	164944966	165010578	0.47716	0.082487	0.785861	0.740035
1585	Amp	1	165011571	165037498	0.30524	0.07661	0.781893	0.740035
1586	Amp	1	165043686	165054437	0.241616	0.073925	0.780451	0.740035
1587	Amp	1	165054524	165093570	0.210594	0.072737	0.779712	0.740035
1588	Amp	1	165094663	165210937	0.362016	0.078538	0.784773	0.740035
1589	Amp	1	165211583	165223243	0.210594	0.072737	0.78367	0.738302
1590	Amp	1	165227163	165248886	0.138391	0.069883	0.783973	0.736568
1591	Amp	1	165248967	165314403	0.128324	0.069414	0.7835	0.736568
1592	Amp	1	165314445	165349399	0.118001	0.068851	0.782693	0.736568
1593	Amp	1	165357763	165386259	0.034113	0.065564	0.780897	0.736568
1594	Amp	1	165389566	165424850	0	0.057788	0.778228	0.734835
1595	Amp	1	165424908	165472489	0	0.056175	0.777122	0.734835
1596	Amp	1	165474126	165476459	0	0.055692	0.776576	0.734835
1597	Amp	1	165477168	165555480	0	0.058771	0.778242	0.734835
1598	Amp	1	165556268	165676283	0	0.058325	0.778202	0.734835
1599	Amp	1	165680478	165701282	0	0.060525	0.777572	0.736568
1600	Amp	1	165708436	165715998	0	0.057446	0.775548	0.736568
1601	Amp	1	165716465	165777498	0	0.056969	0.77529	0.736568
1602	Amp	1	165777831	165865907	0	0.055738	0.775413	0.734835
1603	Amp	1	165868741	165886965	0	0.057058	0.775738	0.734835
1604	Amp	1	165887073	165917901	0	0.059971	0.777315	0.734835
1605	Amp	1	165918160	165936636	0	0.058181	0.776179	0.734835
1606	Amp	1	165939121	165953100	0	0.062475	0.778525	0.734835
1607	Amp	1	165955480	165967349	0	0.058181	0.776201	0.734835
1608	Amp	1	165969923	166074011	0	0.058863	0.775218	0.736568
1609	Amp	1	166076187	166106813	0	0.058177	0.774372	0.736568
1610	Amp	1	166109650	166237236	0	0.055977	0.774787	0.734835
1611	Amp	1	166252574	166423066	0	0.057401	0.775558	0.734835
1612	Amp	1	166423913	166432965	0	0.060463	0.774593	0.734835
1613	Amp	1	166433837	166491280	0	0.05978	0.777331	0.731369
1614	Amp	1	166493012	166493503	0.138391	0.069782	0.778663	0.736568
1615	Amp	1	166503626	166522201	0.089561	0.067944	0.776884	0.736568
1616	Amp	1	166530590	166538349	0.034113	0.065531	0.777908	0.734835
1617	Amp	1	166542230	166567447	0	0.057942	0.775431	0.733102
1618	Amp	1	166568602	166601993	0	0.0593	0.776167	0.733102
1619	Amp	1	166602395	166633612	0	0.061239	0.775267	0.734835
1620	Amp	1	166633786	166692954	0	0.061699	0.773809	0.736568
1621	Amp	1	166693198	166798728	0	0.05976	0.774019	0.734835
1622	Amp	1	166798936	166837945	0	0.058535	0.77578	0.733102
1623	Amp	1	166838646	166939648	0	0.059754	0.777098	0.733102
1624	Amp	1	166940908	166968635	0.029031	0.065261	0.778502	0.733102
1625	Amp	1	166969908	166970858	0.001323	0.064042	0.777881	0.734835
1626	Amp	1	166977119	167001643	0	0.058535	0.776658	0.733102
1627	Amp	1	167006262	167018761	0	0.062418	0.777003	0.734835
1628	Amp	1	167019041	167046752	0.010261	0.064391	0.778125	0.734835
1629	Amp	1	167047086	167055371	0.001323	0.063932	0.780322	0.733102
1630	Amp	1	167059022	167069699	0	0.061907	0.778056	0.734835
1631	Amp	1	167069735	167074474	0	0.058024	0.777713	0.733102
1632	Amp	1	167075290	167264344	0.024438	0.065033	0.779673	0.734835
1633	Amp	1	167264929	167286806	0.044794	0.065971	0.776808	0.736568
1634	Amp	1	167290099	167364080	0.001323	0.063937	0.774601	0.736568
1635	Amp	1	167364874	167442147	0.040093	0.065679	0.777126	0.736568
1636	Amp	1	167443582	167467645	0.060686	0.066597	0.775796	0.738302
1637	Amp	1	167476370	167485677	0	0.06152	0.773062	0.738302
1638	Amp	1	167485732	167515903	0	0.059779	0.77204	0.738302
1639	Amp	1	167516398	167609842	0	0.058861	0.773361	0.736568
1640	Amp	1	167610766	167643062	0	0.062704	0.775697	0.736568
1641	Amp	1	167643460	167652633	0.107017	0.068412	0.778779	0.736568
1642	Amp	1	167652663	167726064	0.118001	0.068927	0.779115	0.736568
1643	Amp	1	167726262	167805599	0.08435	0.067666	0.778355	0.736568
1644	Amp	1	167808822	167832356	0.128324	0.069481	0.779538	0.736568
1645	Amp	1	167834018	167856543	0.241616	0.07398	0.780141	0.738302
1646	Amp	1	167860768	167878372	0.128324	0.069481	0.779538	0.736568
1647	Amp	1	167879396	167999787	0.107017	0.068587	0.779056	0.736568
1648	Amp	1	168000216	168041982	0.143787	0.070137	0.779892	0.736568
1649	Amp	1	168044612	168164534	0.238246	0.073713	0.783208	0.736568
1650	Amp	1	168168342	168212716	0.379885	0.079239	0.784308	0.738302
1651	Amp	1	168212867	168254026	0.47716	0.082416	0.784292	0.740035
1652	Amp	1	168254683	168268292	0.404718	0.080119	0.783058	0.740035
1653	Amp	1	168268938	168286535	0.322897	0.077205	0.781446	0.740035
1654	Amp	1	168287267	168367385	0.431198	0.08085	0.783406	0.740035
1655	Amp	1	168369504	168369504	0.34892	0.078013	0.78174	0.740035
1656	Amp	1	168369887	168393560	0.264858	0.074977	0.780108	0.740035
1657	Amp	1	168396460	168612187	0.133193	0.069681	0.777262	0.740035
1658	Amp	1	168612881	168626283	0.259438	0.074824	0.780561	0.740035
1659	Amp	1	168626605	168694160	0.335313	0.077701	0.782107	0.740035
1660	Amp	1	168696108	168705822	0.355319	0.07836	0.780633	0.741768
1661	Amp	1	168706369	168758326	0.404718	0.080027	0.779762	0.743501
1662	Amp	1	168759234	168774357	0.583752	0.085787	0.782693	0.743501
1663	Amp	1	168774536	168856794	0.404718	0.080027	0.779564	0.743501
1664	Amp	1	168858048	168866506	0.379885	0.079115	0.779154	0.743501
1665	Amp	1	168868156	168984086	0.1237	0.069078	0.775593	0.741768
1666	Amp	1	168984407	169007204	0.181932	0.071512	0.77362	0.745234
1667	Amp	1	169012926	169050984	0.164935	0.070854	0.775071	0.743501
1668	Amp	1	169051274	169067410	0.107017	0.068419	0.77504	0.741768
1669	Amp	1	169069175	169092320	0.204831	0.072489	0.777222	0.741768
1670	Amp	1	169092543	169115853	0.107017	0.068419	0.775011	0.741768
1671	Amp	1	169115881	169163534	0.170723	0.071041	0.776417	0.741768
1672	Amp	1	169164203	169230187	0.107017	0.068419	0.774986	0.741768
1673	Amp	1	169234328	169246873	0.133193	0.069649	0.775528	0.741768
1674	Amp	1	169247699	169299454	0.159312	0.070751	0.776119	0.741768
1675	Amp	1	169299505	169380527	0.138391	0.069713	0.777369	0.740035
1676	Amp	1	169387110	169402310	0.164935	0.070868	0.777941	0.740035
1677	Amp	1	169407087	169549990	0.222041	0.073077	0.77921	0.740035
1678	Amp	1	169550656	169600047	0.368062	0.078674	0.781371	0.740035
1679	Amp	1	169600207	169603709	0.404718	0.080052	0.782112	0.740035
1680	Amp	1	169607679	169609348	0.193543	0.071898	0.781336	0.736568
1681	Amp	1	169611479	169612357	0.112543	0.068765	0.781171	0.734835
1682	Amp	1	169613959	169640827	0.153838	0.070541	0.780678	0.736568
1683	Amp	1	169643195	169645462	0.215608	0.072929	0.781968	0.736568
1684	Amp	1	169646782	169845036	0.241616	0.074004	0.781868	0.738302
1685	Amp	1	169845054	169998107	0.215608	0.072929	0.784432	0.734835
1686	Amp	1	170000186	170115044	0.187449	0.071827	0.784148	0.734835
1687	Amp	1	170115361	170120080	0.204831	0.072341	0.784528	0.734835
1688	Amp	1	170123850	170127275	0.227787	0.073377	0.785088	0.734835
1689	Amp	1	170127928	170274741	0.282828	0.075635	0.784479	0.736568
1690	Amp	1	170275090	170300051	0.264858	0.07512	0.784014	0.736568
1691	Amp	1	170301927	170311826	0.311747	0.076849	0.784947	0.736568
1692	Amp	1	170311996	170314016	0.329205	0.077341	0.785213	0.736568
1693	Amp	1	170314735	170352336	0.362016	0.078503	0.785919	0.736568
1694	Amp	1	170352588	170486547	0.399144	0.079758	0.78791	0.734835
1695	Amp	1	170486923	170562245	0.329205	0.0775	0.789438	0.733102
1696	Amp	1	170566495	170702265	0.299433	0.076245	0.788755	0.733102
1697	Amp	1	170705164	170709703	0.316877	0.077052	0.787746	0.734835
1698	Amp	1	170715028	170731617	0.355319	0.078376	0.788607	0.734835
1699	Amp	1	170732312	170890018	0.373599	0.079008	0.788949	0.734835
1700	Amp	1	170890046	170916222	0.316877	0.077035	0.787636	0.734835
1701	Amp	1	170916422	171038518	0.287738	0.075873	0.786997	0.734835
1702	Amp	1	171038996	171205761	0.311747	0.076742	0.7871	0.734835
1703	Amp	1	171206104	171321991	0.19964	0.072289	0.784611	0.734835
1704	Amp	1	171322647	171394293	0.17597	0.07142	0.78439	0.734835
1705	Amp	1	171396053	171416234	0.282828	0.075769	0.785656	0.736568
1706	Amp	1	171416911	171462672	0.17597	0.07142	0.783308	0.736568
1707	Amp	1	171462927	171465297	0.193543	0.071988	0.784409	0.736568
1708	Amp	1	171465502	171486525	0.210594	0.072652	0.782935	0.738302
1709	Amp	1	171487107	171539000	0.159312	0.070696	0.781881	0.738302
1710	Amp	1	171541900	171547323	0.143787	0.070031	0.783352	0.736568
1711	Amp	1	171549304	171567285	0.215608	0.072819	0.784858	0.736568
1712	Amp	1	171570149	171623413	0.079652	0.067515	0.781962	0.736568
1713	Amp	1	171623729	171650397	0.069848	0.067023	0.781046	0.736568
1714	Amp	1	171661386	171697384	0.107017	0.068423	0.782749	0.736568
1715	Amp	1	171697692	171786349	0.159312	0.070655	0.78417	0.736568
1716	Amp	1	171786457	171805969	0.107017	0.068446	0.783567	0.736568
1717	Amp	1	171807582	171825768	0.056211	0.066371	0.782447	0.736568
1718	Amp	1	171826101	171858383	0.044794	0.065803	0.781988	0.736568
1719	Amp	1	171858930	171886179	0.019169	0.064767	0.781332	0.736568
1720	Amp	1	171888936	171982895	0.204831	0.072451	0.785481	0.736568
1721	Amp	1	171985131	172014580	0.316877	0.076961	0.785938	0.738302
1722	Amp	1	172015151	172017818	0.259438	0.074859	0.78458	0.738302
1723	Amp	1	172020948	172021331	0.094967	0.068171	0.780977	0.738302
1724	Amp	1	172026578	172035351	0	0.063662	0.78037	0.736568
1725	Amp	1	172035965	172055388	0.024438	0.065038	0.779307	0.738302
1726	Amp	1	172066357	172124794	0.010261	0.064406	0.778934	0.738302
1727	Amp	1	172124990	172202137	0.040093	0.065759	0.780824	0.736568
1728	Amp	1	172204489	172353657	0.069848	0.066897	0.781439	0.736568
1729	Amp	1	172354952	172366441	0.1237	0.069137	0.782648	0.736568
1730	Amp	1	172367694	172590390	0.159312	0.070668	0.783501	0.736568
1731	Amp	1	172591373	172646255	0.1237	0.069137	0.78279	0.736568
1732	Amp	1	172646342	172664835	0.153838	0.070564	0.783646	0.736568
1733	Amp	1	172666284	172704182	0.17597	0.071424	0.785692	0.736568
1734	Amp	1	172708034	172716735	0.287738	0.075964	0.786302	0.738302
1735	Amp	1	172718418	172740114	0.17597	0.071424	0.785692	0.736568
1736	Amp	1	172742283	172760464	0.227787	0.073387	0.786918	0.736568
1737	Amp	1	172761074	172796720	0.276783	0.075364	0.785016	0.738302
1738	Amp	1	172804927	172831665	0.368062	0.078738	0.786834	0.738302
1739	Amp	1	172835343	172893961	0.311747	0.076775	0.78605	0.740035
1740	Amp	1	172904853	172923812	0.222041	0.073143	0.78425	0.740035
1741	Amp	1	172924674	172953785	0.143787	0.069967	0.784265	0.738302
1742	Amp	1	172958601	173039847	0.193543	0.072018	0.785511	0.738302
1743	Amp	1	173040692	173139256	0.14896	0.070231	0.784347	0.738302
1744	Amp	1	173141814	173195672	0.050473	0.066089	0.781355	0.738302
1745	Amp	1	173197500	173385062	0.015369	0.064689	0.780593	0.738302
1746	Amp	1	173386954	173399532	0.044794	0.065832	0.779395	0.740035
1747	Amp	1	173401264	173485297	0.164935	0.070795	0.782063	0.740035
1748	Amp	1	173495207	173519606	0.255918	0.074549	0.784938	0.738302
1749	Amp	1	173519619	173602478	0.282828	0.07576	0.785591	0.738302
1750	Amp	1	173602889	173625042	0.251218	0.074384	0.786194	0.736568
1751	Amp	1	173631165	173813720	0.282828	0.075756	0.785182	0.738302
1752	Amp	1	173818553	173820391	0.293269	0.076213	0.784783	0.740035
1753	Amp	1	173821160	173862963	0.34892	0.078126	0.783987	0.741768
1754	Amp	1	173863668	173886481	0.47716	0.082312	0.786323	0.741768
1755	Amp	1	173887018	173922963	0.437198	0.081101	0.785531	0.741768
1756	Amp	1	173923522	173984699	0.515676	0.083747	0.787438	0.741768
1757	Amp	1	173988491	174060209	0.457501	0.081834	0.787415	0.740035
1758	Amp	1	174061622	174067134	0.355319	0.078194	0.785459	0.740035
1759	Amp	1	174071456	174157455	0.463534	0.082074	0.787544	0.740035
1760	Amp	1	174157604	174197402	0.557122	0.084904	0.789195	0.740035
1761	Amp	1	174200703	174301068	0.515676	0.083725	0.790392	0.738302
1762	Amp	1	174302481	174321084	0.47716	0.082324	0.789637	0.738302
1763	Amp	1	174323134	174325413	0.595248	0.086268	0.792413	0.738302
1764	Amp	1	174325607	174509998	0.609133	0.086814	0.793278	0.738302
1765	Amp	1	174511292	174637805	0.72817	0.090283	0.795228	0.738302
1766	Amp	1	174645494	174657083	0.595248	0.086282	0.792687	0.738302
1767	Amp	1	174664167	174742253	0.636464	0.087712	0.793493	0.738302
1768	Amp	1	174743384	174826008	0.681869	0.089009	0.794374	0.738302
1769	Amp	1	174826061	174880627	0.735486	0.090352	0.794883	0.740035
1770	Amp	1	174882485	174893906	0.790614	0.091949	0.794616	0.741768
1771	Amp	1	174897475	175009729	0.86541	0.093991	0.795711	0.741768
1772	Amp	1	175014071	175031221	0.899693	0.094814	0.79681	0.743501
1773	Amp	1	175033554	175051170	0.977077	0.09666	0.796218	0.745234
1774	Amp	1	175051406	175058848	0.995635	0.097112	0.797439	0.745234
1775	Amp	1	175059972	175060411	1.023539	0.097828	0.797875	0.745234
1776	Amp	1	175060796	175088986	0.950886	0.095982	0.798747	0.743501
1777	Amp	1	175089326	175123704	1.058188	0.09878	0.798383	0.745234
1778	Amp	1	175132858	175136642	1.041205	0.098239	0.798263	0.745234
1779	Amp	1	175140748	175236035	1.075952	0.099227	0.798791	0.745234
1780	Amp	1	175240742	175303532	1.023539	0.097798	0.798484	0.746967
1781	Amp	1	175303557	175360867	1.075952	0.099127	0.799191	0.746967
1782	Amp	1	175361054	175422605	0.86541	0.093875	0.796395	0.746967
1783	Amp	1	175429575	175458019	0.840289	0.093159	0.797128	0.745234
1784	Amp	1	175459821	175460288	0.751221	0.090817	0.795796	0.745234
1785	Amp	1	175461075	175461075	0.720659	0.09001	0.795365	0.745234
1786	Amp	1	175461672	175796653	0.857296	0.093701	0.796047	0.746967
1787	Amp	1	175800018	175825153	0.807647	0.092358	0.796286	0.7487
1788	Amp	1	175825331	175832596	0.781972	0.091812	0.795952	0.7487
1789	Amp	1	175833393	175901001	0.609133	0.086746	0.793261	0.7487
1790	Amp	1	175902145	175966605	0.583752	0.085922	0.792823	0.7487
1791	Amp	1	175969436	176046981	0.386426	0.079269	0.791105	0.746967
1792	Amp	1	176046996	176076520	0.494792	0.083161	0.791357	0.7487
1793	Amp	1	176079807	176098233	0.463534	0.082023	0.790592	0.7487
1794	Amp	1	176101395	176184323	0.362016	0.078555	0.787208	0.750433
1795	Amp	1	176184455	176241539	0.379885	0.07923	0.788128	0.750433
1796	Amp	1	176245434	176316411	0.276783	0.075544	0.786138	0.750433
1797	Amp	1	176320689	176365536	0.251218	0.074386	0.785524	0.750433
1798	Amp	1	176365719	176388319	0.241616	0.073929	0.785218	0.750433
1799	Amp	1	176390643	176402829	0.210594	0.072606	0.78297	0.750433
1800	Amp	1	176407436	176433120	0.246818	0.074185	0.783807	0.750433
1801	Amp	1	176433664	176462831	0.159312	0.070737	0.784358	0.7487
1802	Amp	1	176465473	176469540	0.17597	0.07129	0.783244	0.7487
1803	Amp	1	176469979	176497473	0.187449	0.071812	0.783538	0.7487
1804	Amp	1	176501633	176597181	0.153838	0.070515	0.782782	0.7487
1805	Amp	1	176597214	176645148	0.181932	0.071505	0.784627	0.7487
1806	Amp	1	176650134	176676480	0.210594	0.072686	0.785552	0.7487
1807	Amp	1	176677196	176809474	0.251218	0.074332	0.786499	0.7487
1808	Amp	1	176812307	176830007	0.373599	0.079023	0.79047	0.7487
1809	Amp	1	176837251	177022690	0.399144	0.07975	0.789236	0.750433
1810	Amp	1	177023279	177160901	0.362016	0.078569	0.788592	0.750433
1811	Amp	1	177161213	177179023	0.457501	0.081846	0.791185	0.750433
1812	Amp	1	177183180	177198483	0.362016	0.078569	0.789449	0.750433
1813	Amp	1	177198747	177289357	0.34892	0.078127	0.78888	0.750433
1814	Amp	1	177296205	177372805	0.463534	0.082029	0.790948	0.750433
1815	Amp	1	177375767	177457636	0.34892	0.078127	0.78888	0.750433
1816	Amp	1	177457869	177589544	0.30524	0.076591	0.790535	0.750433
1817	Amp	1	177592303	177642183	0.482379	0.082544	0.794988	0.750433
1818	Amp	1	177644788	177768254	0.536238	0.084316	0.796049	0.750433
1819	Amp	1	177768529	177946677	0.589605	0.086123	0.800097	0.7487
1820	Amp	1	177948344	177949151	0.576183	0.085601	0.799822	0.7487
1821	Amp	1	177956704	177966068	0.470509	0.082194	0.796162	0.750433
1822	Amp	1	177966140	177966140	0.457501	0.08175	0.795927	0.750433
1823	Amp	1	177968306	177999481	0.437198	0.081197	0.795634	0.750433
1824	Amp	1	177999924	178030632	0.463534	0.081896	0.796004	0.750433
1825	Amp	1	178030933	178097064	0.450702	0.081443	0.795764	0.750433
1826	Amp	1	178099044	178173003	0.494792	0.083069	0.796293	0.750433
1827	Amp	1	178173061	178225389	0.457501	0.081662	0.795457	0.750433
1828	Amp	1	178226123	178275600	0.373599	0.078864	0.795812	0.7487
1829	Amp	1	178277987	178307749	0.246818	0.074172	0.7933	0.7487
1830	Amp	1	178321672	178370370	0.210594	0.072547	0.791929	0.7487
1831	Amp	1	178373684	178438683	0.329205	0.077466	0.794562	0.7487
1832	Amp	1	178445938	178463010	0.204831	0.072381	0.790801	0.750433
1833	Amp	1	178465059	178475772	0.30524	0.07658	0.793115	0.750433
1834	Amp	1	178476680	178591024	0.181932	0.07147	0.792144	0.7487
1835	Amp	1	178592776	178734846	0.060686	0.066551	0.789512	0.7487
1836	Amp	1	178735054	178746125	0.100827	0.068201	0.788973	0.7487
1837	Amp	1	178756094	178756094	0.153838	0.070374	0.788412	0.750433
1838	Amp	1	178761953	178789212	0.069848	0.066944	0.786594	0.750433
1839	Amp	1	178789230	179164599	0.001323	0.063989	0.784837	0.750433
1840	Amp	1	179164628	179174661	0	0.063263	0.784218	0.7487
1841	Amp	1	179180155	179283457	0.128324	0.069369	0.786721	0.7487
1842	Amp	1	179284332	179402260	0.08435	0.067718	0.786938	0.746967
1843	Amp	1	179403407	179670065	0.069848	0.066949	0.78638	0.746967
1844	Amp	1	179672700	179748696	0.040093	0.065704	0.786061	0.7487
1845	Amp	1	179749120	179931509	0.056211	0.066237	0.787054	0.7487
1846	Amp	1	179931843	180018679	0.034113	0.065538	0.786129	0.7487
1847	Amp	1	180018767	180047080	0.073902	0.067297	0.787063	0.7487
1848	Amp	1	180047451	180058113	0.118001	0.068892	0.788077	0.7487
1849	Amp	1	180065205	180083659	0.079652	0.067402	0.789112	0.746967
1850	Amp	1	180090850	180187532	0.094967	0.068118	0.789962	0.746967
1851	Amp	1	180187565	180245029	0.19964	0.072188	0.794697	0.745234
1852	Amp	1	180246133	180310767	0.299433	0.076354	0.795662	0.746967
1853	Amp	1	180311843	180370763	0.19964	0.072188	0.793444	0.746967
1854	Amp	1	180370828	180385127	0.238246	0.07369	0.794244	0.746967
1855	Amp	1	180385430	180385430	0.193543	0.071931	0.793304	0.746967
1856	Amp	1	180391765	180400633	0.128324	0.069384	0.79368	0.745234
1857	Amp	1	180403643	180420057	0.233782	0.073413	0.794009	0.746967
1858	Amp	1	180421908	180444407	0.241616	0.073963	0.796471	0.746967
1859	Amp	1	180456073	180456073	0.404718	0.079972	0.799738	0.746967
1860	Amp	1	180457145	180457145	0.543344	0.084674	0.800504	0.7487
1861	Amp	1	180462803	180499955	0.609133	0.086707	0.799828	0.750433
1862	Amp	1	180501690	180526534	0.522881	0.083858	0.797304	0.752166
1863	Amp	1	180534437	180549122	0.342649	0.077849	0.794095	0.752166
1864	Amp	1	180552234	180645596	0.282828	0.075676	0.794668	0.750433
1865	Amp	1	180647576	180674749	0.241616	0.074031	0.793796	0.750433
1866	Amp	1	180675702	180723679	0.193543	0.071998	0.794457	0.7487
1867	Amp	1	180723846	180977656	0.153838	0.070496	0.793583	0.7487
1868	Amp	1	180980492	181003505	0.060686	0.066569	0.791587	0.7487
1869	Amp	1	181003821	181007637	0.044794	0.065894	0.791228	0.7487
1870	Amp	1	181007755	181049280	0.112543	0.068678	0.790878	0.750433
1871	Amp	1	181051045	181070775	0.044794	0.065894	0.791228	0.7487
1872	Amp	1	181073225	181095233	0.079652	0.067336	0.792086	0.7487
1873	Amp	1	181095813	181168596	0.14896	0.070224	0.793647	0.7487
1874	Amp	1	181168684	181192707	0.204831	0.072369	0.794872	0.7487
1875	Amp	1	181197543	181449389	0.128324	0.069481	0.793722	0.746967
1876	Amp	1	181451900	181460870	0.238246	0.073681	0.796106	0.746967
1877	Amp	1	181468422	181600755	0.128324	0.069481	0.793869	0.746967
1878	Amp	1	181605028	181608185	0.181932	0.071645	0.794781	0.746967
1879	Amp	1	181608497	181656566	0.227787	0.073238	0.794041	0.7487
1880	Amp	1	181657172	181800418	0.181932	0.071645	0.793024	0.7487
1881	Amp	1	181801401	181872914	0.153838	0.070424	0.792367	0.7487
1882	Amp	1	181875086	181954433	0.19964	0.07214	0.792859	0.750433
1883	Amp	1	181956295	181984574	0.143787	0.069995	0.791723	0.750433
1884	Amp	1	181985583	182000768	0.153838	0.070448	0.791982	0.750433
1885	Amp	1	182001314	182012245	0.112543	0.068732	0.791072	0.750433
1886	Amp	1	182013255	182118842	0.153838	0.070484	0.79201	0.750433
1887	Amp	1	182120000	182331438	0.255918	0.074691	0.792721	0.752166
1888	Amp	1	182333172	182406106	0.241616	0.073975	0.792977	0.752166
1889	Amp	1	182407094	182442493	0.299433	0.076236	0.794043	0.752166
1890	Amp	1	182442872	182500607	0.241616	0.073975	0.792848	0.752166
1891	Amp	1	182503303	182557704	0.276783	0.075548	0.79368	0.752166
1892	Amp	1	182558274	182620196	0.238246	0.073796	0.79261	0.752166
1893	Amp	1	182623201	182670397	0.368062	0.078723	0.79473	0.752166
1894	Amp	1	182671503	182765453	0.355319	0.07819	0.79432	0.752166
1895	Amp	1	182767920	182822649	0.576183	0.085582	0.798392	0.752166
1896	Amp	1	182822762	182835324	0.355319	0.07819	0.794039	0.753899
1897	Amp	1	182840976	182877607	0.143787	0.069954	0.79115	0.752166
1898	Amp	1	182886563	182905678	0.181932	0.071491	0.789872	0.753899
1899	Amp	1	182907516	182950467	0.251218	0.07429	0.789533	0.755633
1900	Amp	1	182954587	183189008	0.282828	0.075644	0.790037	0.755633
1901	Amp	1	183189839	183260243	0.368062	0.078689	0.7914	0.755633
1902	Amp	1	183265106	183268177	0.392611	0.079597	0.791878	0.755633
1903	Amp	1	183271294	183308836	0.450702	0.081493	0.793018	0.755633
1904	Amp	1	183313440	183340114	0.508568	0.083395	0.792928	0.757366
1905	Amp	1	183340683	183444030	0.450702	0.081434	0.791897	0.757366
1906	Amp	1	183444048	183485747	0.431198	0.080879	0.792836	0.757366
1907	Amp	1	183491131	183491131	0.470509	0.082158	0.793507	0.757366
1908	Amp	1	183491979	183762567	0.602643	0.08652	0.795798	0.757366
1909	Amp	1	183762984	183835475	0.417873	0.080414	0.793836	0.753899
1910	Amp	1	183837140	183868762	0.276783	0.075488	0.793158	0.752166
1911	Amp	1	183869871	183919724	0.287738	0.075968	0.791588	0.753899
1912	Amp	1	183920418	184004377	0.238246	0.073803	0.790552	0.753899
1913	Amp	1	184007775	184038024	0.34892	0.077954	0.793154	0.753899
1914	Amp	1	184043572	184093663	0.329205	0.077475	0.794617	0.752166
1915	Amp	1	184098823	184099197	0.392611	0.079561	0.79572	0.752166
1916	Amp	1	184101360	184116285	0.227787	0.073303	0.792396	0.752166
1917	Amp	1	184116899	184195951	0.17597	0.071236	0.793131	0.750433
1918	Amp	1	184199379	184425123	0.316877	0.07695	0.795363	0.752166
1919	Amp	1	184425822	184593415	0.368062	0.078631	0.795871	0.752166
1920	Amp	1	184593758	184655059	0.417873	0.080509	0.792724	0.755633
1921	Amp	1	184658379	184729797	0.399144	0.079865	0.792724	0.755633
1922	Amp	1	184738407	184740448	0.133193	0.069559	0.787056	0.755633
1923	Amp	1	184746073	184748591	0.089561	0.067878	0.786171	0.755633
1924	Amp	1	184751581	184936129	0.181932	0.071468	0.78806	0.755633
1925	Amp	1	184937728	184959033	0.089561	0.067878	0.782974	0.757366
1926	Amp	1	184960470	185209154	0.193543	0.072021	0.785069	0.757366
1927	Amp	1	185212352	185218711	0.355319	0.078182	0.789503	0.757366
1928	Amp	1	185221515	185244009	0.368062	0.078783	0.789901	0.757366
1929	Amp	1	185248022	185311039	0.487495	0.082739	0.790296	0.759099
1930	Amp	1	185320236	185331277	0.293269	0.076133	0.786665	0.759099
1931	Amp	1	185333367	185353357	0.444474	0.081288	0.789132	0.759099
1932	Amp	1	185353412	185444650	0.457501	0.08185	0.78923	0.759099
1933	Amp	1	185452895	185496837	0.4115	0.080304	0.787548	0.760832
1934	Amp	1	185498143	185507583	0.529451	0.084122	0.788007	0.762565
1935	Amp	1	185517348	185520547	0.457501	0.081706	0.786546	0.762565
1936	Amp	1	185520620	185560560	0.392611	0.079596	0.785446	0.762565
1937	Amp	1	185560585	185650460	0.329205	0.077509	0.784699	0.762565
1938	Amp	1	185661979	185664628	0.287738	0.075973	0.786338	0.759099
1939	Amp	1	185671086	185677426	0.222041	0.073174	0.786668	0.757366
1940	Amp	1	185680701	185772037	0.246818	0.074103	0.787585	0.757366
1941	Amp	1	185773715	185795183	0.210594	0.07253	0.786044	0.757366
1942	Amp	1	185795687	185807555	0.241616	0.073962	0.786794	0.757366
1943	Amp	1	185810907	186007923	0.255918	0.074618	0.78734	0.757366
1944	Amp	1	186008738	186179382	0.238246	0.07371	0.78653	0.759099
1945	Amp	1	186179414	186199149	0.222041	0.073109	0.785994	0.759099
1946	Amp	1	186202254	186297486	0.238246	0.073699	0.787485	0.759099
1947	Amp	1	186301689	186321654	0.255918	0.074574	0.786546	0.760832
1948	Amp	1	186325773	186393508	0.264858	0.07502	0.785077	0.762565
1949	Amp	1	186393987	186502169	0.251218	0.074429	0.78461	0.762565
1950	Amp	1	186506777	186522908	0.227787	0.073274	0.783306	0.762565
1951	Amp	1	186526209	186563439	0.17597	0.071372	0.782136	0.762565
1952	Amp	1	186563874	186626970	0.133193	0.069565	0.781006	0.762565
1953	Amp	1	186629010	186647778	0.044794	0.065916	0.779102	0.762565
1954	Amp	1	186648585	186773815	0.069848	0.06702	0.779678	0.762565
1955	Amp	1	186779571	186805761	0.044794	0.065963	0.780589	0.760832
1956	Amp	1	186808580	186858008	0.015369	0.064531	0.777493	0.762565
1957	Amp	1	186863290	186967030	0	0.061451	0.776043	0.762565
1958	Amp	1	186967078	186973994	0	0.06206	0.776256	0.764298
1959	Amp	1	186976597	187185171	0	0.058492	0.77612	0.762565
1960	Amp	1	187186451	187234882	0	0.055212	0.776032	0.762565
1961	Amp	1	187236541	187276141	0	0.057242	0.777445	0.764298
1962	Amp	1	187278654	187289221	0	0.056403	0.776985	0.764298
1963	Amp	1	187294725	187336241	0	0.053566	0.775509	0.764298
1964	Amp	1	187339106	187365248	0	0.056027	0.776661	0.764298
1965	Amp	1	187366710	187370743	0	0.052585	0.77487	0.764298
1966	Amp	1	187372275	187408877	0	0.056661	0.777278	0.764298
1967	Amp	1	187411591	187421088	0	0.057208	0.77614	0.766031
1968	Amp	1	187425229	187450843	0	0.053132	0.774024	0.766031
1969	Amp	1	187457697	187487566	0	0.05176	0.774974	0.764298
1970	Amp	1	187488040	187539704	0	0.050656	0.774304	0.764298
1971	Amp	1	187540262	187615567	0	0.049573	0.774546	0.764298
1972	Amp	1	187618200	187618547	0	0.054754	0.777145	0.764298
1973	Amp	1	187620412	187638601	0	0.052724	0.776089	0.764298
1974	Amp	1	187642100	187654839	0	0.055974	0.777983	0.764298
1975	Amp	1	187654933	187682531	0	0.052724	0.776216	0.764298
1976	Amp	1	187687043	187721405	0	0.055598	0.777406	0.764298
1977	Amp	1	187721842	187818129	0	0.051157	0.775011	0.764298
1978	Amp	1	187825821	187853859	0	0.050418	0.775203	0.764298
1979	Amp	1	187870546	187883709	0	0.051894	0.774307	0.766031
1980	Amp	1	187884722	187893525	0	0.050048	0.774688	0.764298
1981	Amp	1	187897338	187982615	0	0.055843	0.77771	0.764298
1982	Amp	1	187986168	188025291	0	0.055103	0.77734	0.764298
1983	Amp	1	188027894	188118001	0	0.049308	0.774325	0.764298
1984	Amp	1	188118961	188150986	0	0.051199	0.777467	0.764298
1985	Amp	1	188151783	188165938	0	0.052168	0.777971	0.764298
1986	Amp	1	188173876	188178429	0	0.048969	0.776307	0.764298
1987	Amp	1	188181210	188212545	0	0.050786	0.777253	0.764298
1988	Amp	1	188213590	188223362	0	0.047912	0.777915	0.760832
1989	Amp	1	188227636	188327577	0	0.048551	0.777986	0.762565
1990	Amp	1	188329154	188397151	0	0.050237	0.776912	0.764298
1991	Amp	1	188401948	188403731	0	0.047266	0.777086	0.762565
1992	Amp	1	188406549	188414043	0	0.063051	0.783616	0.764298
1993	Amp	1	188418319	188555171	0.056211	0.066384	0.783574	0.766031
1994	Amp	1	188556165	188596872	0.015369	0.064698	0.784435	0.764298
1995	Amp	1	188599673	188622609	0	0.061365	0.784479	0.762565
1996	Amp	1	188626495	188626495	0.019169	0.064784	0.78448	0.764298
1997	Amp	1	188629036	188670882	0.044794	0.065843	0.78503	0.764298
1998	Amp	1	188673775	188750007	0.073902	0.067308	0.785793	0.764298
[truncated: 47,146 more rows]
