# Supplementary material for: A Ferroptosis-associated Gene Signature for the Prediction of Prognosis and Therapeutic Response in Luminal-type Breast Carcinoma
Source: Research Square preprint supplement (doi:10.21203/rs.3.rs-125141/v1), 2020-12-12
Supplement: Supplementary file 3 [file 9685867787bde73590decaf2.csv]

Complete list of 10 candidate gene in the METABRIC cohort
	OS.time	OS	CRYAB	PTGS2	PRKCA	AKR1C3	FANCD2	G6PD	ACSL4	ACO1	NQO1	CS
MB-0002	84.63333333	0	6.907372846	5.754286058	5.860844768	7.562530582	6.725265946	8.76389733	6.580079287	9.728624716	10.9415924	7.733852864
MB-0005	163.7	1	8.644812412	7.404578153	6.105563475	7.78853005	6.778085241	8.129927467	8.561804754	9.633105012	9.076757856	7.257595107
MB-0006	164.9333333	0	7.92320109	6.038329602	6.654168271	7.611662442	6.960574097	8.469311588	8.236440748	8.788133595	11.20280706	7.463015606
MB-0008	41.36666667	1	9.026136374	6.716833943	5.885327969	8.322077602	6.796827192	8.986709689	7.149215988	9.436694845	12.25632061	7.562216133
MB-0010	7.8	1	7.560317162	6.169141659	6.50126818	8.415016269	6.998417681	8.843560911	7.336077871	8.7296657	11.5004318	8.026297721
MB-0014	164.3333333	0	8.945449298	7.925600849	6.373077473	9.619248934	6.671650237	7.421128677	8.299278654	9.666427355	9.570582128	6.893359146
MB-0028	36.56666667	1	6.965302648	5.865020461	5.784725767	7.945142773	7.558923274	8.638876989	6.115421449	8.570711894	9.702629103	8.244554003
MB-0036	132.0333333	1	9.612482224	6.788706102	6.256813088	8.929415466	6.752797857	8.305487072	6.131930446	9.138918196	8.544771736	7.098479423
MB-0039	163.5333333	0	5.257978001	5.8447905	5.675203228	10.12718117	6.606781229	6.987952586	6.512283579	8.926925061	8.982963133	5.709365653
MB-0046	14.13333333	1	8.582921766	6.674774997	6.066494859	8.950778648	7.238893409	9.015240736	6.391328807	9.810547853	10.3222849	7.641607428
MB-0053	161.0666667	0	7.29740766	6.899224394	6.366296492	10.5068791	6.844362908	7.513778924	8.450670158	9.090256463	11.51130754	7.089635766
MB-0054	160.3	0	7.553058442	6.735961315	6.573325528	8.497650915	7.124936628	7.941522993	8.730763539	8.648522785	9.371092462	5.988465011
MB-0056	62.86666667	0	6.742033756	7.588093635	6.062184164	9.95308368	6.495244152	8.462117733	8.053759702	9.017441445	10.74574764	6.591972636
MB-0060	140.8666667	0	6.009638762	6.868691131	5.820141549	7.088788611	7.721604504	10.18762719	7.059133999	9.567036586	9.409471977	7.615463994
MB-0064	108.9333333	0	7.499895472	6.557222902	6.024826774	9.374590225	6.996529453	8.574584126	7.610469393	8.927808489	8.949880786	7.176247056
MB-0066	157.4333333	0	7.41295206	6.793211213	6.128010818	9.371040947	6.997305225	7.811386203	6.799655228	9.038403197	11.1373501	7.552160131
MB-0068	103.1333333	0	9.522032677	6.461100491	6.553789156	9.232774567	6.808083943	8.109280688	8.25586935	8.983844673	10.50382652	7.185744451
MB-0083	86.06666667	1	8.101688377	8.85115904	6.44308262	9.765207302	7.237655753	8.088179082	8.134010101	9.159409407	10.09078719	7.202452753
MB-0093	153.2	0	6.489780674	8.489576883	6.741674231	8.262820392	6.38571	7.907565938	8.909912116	8.528916879	9.019288141	7.515003317
MB-0095	49.76666667	1	6.040348046	6.256278533	6.08812506	7.174527208	7.649509165	9.377408421	6.405088743	8.627760298	8.940135454	7.354892077
MB-0097	98.7	0	6.896602986	6.630726266	5.914380732	7.292255221	6.606655313	8.682998641	6.174256272	9.913083989	13.16680437	7.49864061
MB-0102	140.7666667	1	7.095306334	6.037154835	6.273512012	7.61842528	6.916258651	9.415529016	7.27269162	9.525599119	10.51542861	7.865232133
MB-0106	85.33333333	0	9.779914196	7.621199586	6.719096457	7.703120468	6.677960495	8.42128081	6.746647079	8.738623594	10.05456541	6.620851038
MB-0107	158.0333333	0	7.273883645	6.032967585	6.176498632	7.721951992	8.08906458	9.306029726	7.657584	9.389527825	11.61035205	8.196620266
MB-0111	127.1	0	8.153666118	7.128819242	7.075965034	8.362949534	6.927266329	8.760011939	7.282598413	10.04582883	10.32469079	7.389904979
MB-0112	39.16666667	1	8.876832899	6.275397004	6.452671117	8.730560259	6.477389031	8.106557615	6.67429062	9.733823644	11.04784345	7.618898918
MB-0114	13.4	0	7.72787379	5.616743698	5.947403679	7.456728625	6.9752009	8.840884329	6.457033255	9.53245947	9.546839147	7.887104523
MB-0117	2.4	0	9.726590387	8.099975878	6.647113492	9.361347108	6.82666656	8.68196211	7.105072888	9.891377391	11.25954676	7.520025213
MB-0119	95.86666667	1	7.124938755	5.853062855	5.772581089	7.623422295	6.709233733	9.756864493	6.576358843	9.698324474	10.97137457	8.704774015
MB-0120	29.06666667	1	7.787718295	6.548733967	5.902654562	7.980026988	7.267387483	9.429943456	7.498397665	8.649531094	9.867090254	7.309962862
MB-0121	152.2	0	7.964192774	6.082326893	5.826264028	7.620452644	7.055282583	8.845701225	6.898830997	8.635635859	7.666217939	7.42407169
MB-0122	138.9	0	9.672354087	7.004535045	6.106432808	8.395613416	6.522523298	8.081235577	6.696805496	9.0571585	10.2989693	7.140777837
MB-0123	114.2333333	1	8.30698042	8.372891763	5.877954935	8.694290101	7.363222198	8.193669512	7.32182391	8.711249898	10.60997825	7.43366091
MB-0124	118.2	0	8.490774514	9.153118458	6.322179909	9.744106162	6.611510347	8.172846514	6.987181016	9.365285393	9.705520108	7.103994919
MB-0125	1.266666667	0	6.648916205	5.898018839	5.742430373	9.189919852	6.45645174	8.212168648	6.295611649	9.061564271	9.831362477	7.095583446
MB-0126	127.6333333	0	8.45011259	6.013033747	6.834754396	7.069625913	6.673826888	8.556109955	6.937247542	9.660764418	10.45004053	7.660870541
MB-0130	153.5666667	0	9.281744822	7.099205923	6.727767795	8.575720674	6.755015034	9.326216298	7.146588943	9.49518404	11.83133169	7.425647822
MB-0131	66.63333333	1	7.109705859	6.172958271	6.640763822	6.326203973	6.743066457	8.677357383	6.803296672	8.666511426	9.837304972	7.762524854
MB-0133	151	0	9.712312512	7.165499938	6.004199986	9.32318342	6.590125827	8.595023981	6.623251652	8.572501467	9.884586202	8.023162499
MB-0134	12.93333333	1	7.546962057	5.879524372	6.094823477	8.451349765	6.645520511	8.480823618	6.681915752	9.783853043	8.342377686	7.649380378
MB-0135	116.6333333	0	7.277735156	5.745076475	6.024832042	8.582680277	7.513172041	7.896984472	6.662477703	9.045872354	9.425634504	7.767929489
MB-0136	88.2	0	7.880720775	7.042810148	6.161919505	8.782253264	6.678017812	8.440919072	7.797451991	9.729979684	8.746796992	7.18533799
MB-0138	150.5666667	0	8.788957447	7.796639387	6.510973401	9.757367448	6.780966649	8.487905448	6.731421141	9.724360601	10.5326533	7.308404324
MB-0139	109.2	0	11.4706325	7.526544713	6.630832687	9.383487505	6.367377306	8.284870581	6.747193292	9.866207452	9.882332543	7.809881806
MB-0140	147.9333333	0	8.22705974	6.6492529	5.700163128	7.980749862	7.082164121	7.860234778	6.522233301	8.935194601	10.90018533	7.415967205
MB-0142	12.4	0	8.417875605	6.821712826	5.782267945	8.102426032	5.705721425	8.921683049	5.916761923	8.649487332	12.20312555	7.499724025
MB-0143	54.33333333	1	7.196437528	5.704735174	5.948490291	7.896715966	7.369218498	8.572116845	6.413935642	9.234754591	10.15134506	7.964788153
MB-0144	152.0666667	1	8.131362194	6.443100394	6.497791389	7.679343782	7.084597765	8.830324459	7.072416387	9.70589944	10.14043813	7.591531151
MB-0145	147.6666667	0	10.49277101	6.839365026	6.466934931	9.334611098	6.090331502	8.179724121	6.603221862	10.12223085	9.620310093	7.41383376
MB-0146	122.1666667	1	6.234045588	5.665367886	6.008241569	6.333510538	7.076770013	8.713237466	6.447921919	8.593055095	10.22257771	8.573362868
MB-0147	51.76666667	1	8.041666091	5.496078639	6.354127609	7.861924672	6.977011707	8.943640243	5.462326488	9.047396353	10.78333093	7.304885244
MB-0151	49.23333333	1	8.200407417	5.948466353	5.957491232	8.038537114	6.957960238	8.683514566	6.237657851	9.614790083	9.21195825	7.938166258
MB-0154	114.7666667	0	8.823575761	8.896079676	6.630506064	8.831709803	6.089443061	8.875290658	7.218760912	9.59425161	10.95999004	7.33993749
MB-0162	55.76666667	0	8.027582426	7.863133252	6.456840989	8.102048983	6.894847285	8.486982328	7.383249477	9.164440878	10.09564331	6.981458703
MB-0165	47.63333333	1	8.453344739	6.074209886	6.776015697	8.453969366	7.110313956	8.743467543	7.369913653	9.073307374	9.939432002	6.940264478
MB-0166	104.4	0	8.973794644	6.580536011	6.101724297	8.994090006	7.028038486	8.815896308	6.362292326	9.712545862	8.29195861	7.263433038
MB-0167	43.1	1	7.147932198	5.703494953	5.723439234	7.862995513	7.496951746	8.864258935	6.572073351	9.222787972	10.24405132	7.64717662
MB-0170	93.36666667	1	8.936551248	9.665950639	6.218567277	8.99834803	6.531097474	8.412660998	7.072489456	9.211611241	9.972936878	6.980021851
MB-0172	138.1	0	8.278778986	6.608454641	6.227030889	8.822194075	6.511088183	8.402739715	6.945015028	9.081552428	9.853022727	7.139737837
MB-0173	3.766666667	0	5.837761873	6.437628814	5.599302434	6.60726789	6.782723241	9.16321863	6.249092411	8.501021168	7.830167682	8.101307399
MB-0175	72.36666667	0	6.85417761	6.958709809	6.136468863	13.47609347	5.984448209	8.924576548	7.01778055	8.582921766	12.75241716	7.227294671
MB-0176	113.4333333	0	9.748572458	8.351577455	6.456968416	8.570300772	6.877372204	8.693753788	6.499128431	9.458961598	9.63242034	8.036436796
MB-0177	45.6	1	8.591595513	7.063873779	6.461625629	9.310151871	6.352052007	8.605559476	6.824074206	9.408490879	10.4095795	7.151693304
MB-0178	104.4666667	1	6.856913273	6.270272374	5.91842615	8.310073328	7.620937038	9.369830184	6.348395498	8.946296265	11.48047936	7.693913513
MB-0180	62.33333333	0	7.304909725	6.629970842	5.872995729	8.628063563	6.254987238	9.078028105	6.286015392	9.904503053	10.13706619	7.226912928
MB-0181	85.96666667	0	9.83196732	8.719879487	6.259587326	9.565702215	6.518820918	8.931198049	6.700471586	9.864175754	9.821965925	7.748492129
MB-0184	109.0333333	0	9.271764644	5.923952978	6.053316188	7.632615398	6.262132306	8.647064476	6.159646435	9.634585667	7.010103925	7.800406348
MB-0193	19	0	7.38520847	5.449549644	6.304016382	9.66788337	6.85560032	8.733693187	6.633693468	9.290527406	9.66079746	7.074073718
MB-0194	91.6	0	9.692348049	7.846646522	6.260794477	8.761458893	6.16297361	9.009584994	7.362512483	9.506786669	7.891884567	7.155899878
MB-0195	146	0	6.441238867	5.92689094	5.878029876	8.679407673	7.381391333	9.355532593	5.932384663	9.080756655	10.87819683	8.211094148
MB-0197	70.73333333	0	7.951421844	6.180676997	5.812294749	7.055953955	7.448996659	8.413305888	7.405405259	8.942660912	9.449090863	7.540268543
MB-0198	144.7666667	0	7.860093002	6.701603951	6.532923601	8.245576153	7.2555524	8.054990016	7.314054288	10.15512195	9.861217352	7.502531765
MB-0199	144.4	0	8.519796433	6.262814931	6.189639041	10.05136329	6.523982974	8.664135343	6.712722269	9.290933736	9.908743421	7.161737693
MB-0202	128.3666667	0	8.71577165	6.351149721	5.910333862	7.551251444	7.041658609	9.374731909	6.80747059	9.433363435	11.1599498	7.543315978
MB-0203	58.76666667	1	9.773498546	7.523318057	5.955346718	9.079423914	6.672381641	8.52328841	6.990123588	9.240384976	9.68698734	8.105784363
MB-0204	24.3	1	9.552829218	8.172470094	6.76004629	8.871749362	6.555509104	8.221521634	7.042531551	9.884737403	8.999976269	7.496519013
MB-0207	173.6333333	0	8.329199289	6.975433296	6.092837582	8.204280005	7.02115826	8.448350544	6.876272866	9.57530858	8.96059487	7.189127583
MB-0215	122.2	0	8.191940122	6.189805288	5.981916396	8.962652337	7.127328836	8.563083016	7.034877065	9.112502762	11.05217728	7.405867696
MB-0218	131.0666667	0	7.555091499	6.971866864	6.095088257	8.196917642	7.054483989	9.515461474	6.941417529	9.206621277	7.352716538	7.938121622
MB-0223	81.33333333	1	8.875988972	6.173080161	6.080165283	8.308949462	6.706065356	9.3326644	6.712517136	9.45369184	9.554619814	7.330922663
MB-0224	176.7666667	0	10.07453343	7.217158578	6.308259939	8.773661601	6.518394974	8.756974071	7.472540653	10.30347291	9.86215275	7.314398365
MB-0225	212.2	0	6.790854103	7.150574785	5.578233761	7.675114185	7.33614338	9.429781092	6.726254913	7.500754353	8.701710043	7.659344853
MB-0226	57.63333333	0	9.361826407	7.665001319	6.533318478	9.689527264	6.889383633	9.262293325	6.950882835	9.714250162	11.05977372	7.612928789
MB-0227	111.8666667	0	9.122583828	9.624197815	6.576029776	9.66079746	6.406309983	8.769004355	7.971728146	9.240143877	9.039898131	7.099670775
MB-0229	71.5	0	8.053116917	5.79406647	6.141860549	7.726988575	6.695202093	8.650275464	7.217571964	8.826765511	9.425786654	7.436824493
MB-0231	19.6	0	7.822472232	6.936114901	6.364493091	7.628338973	5.912275666	8.497561363	6.880101412	9.805741442	10.34512536	7.553296108
MB-0232	207.6333333	0	6.84429685	7.006734771	6.125098834	7.588390899	6.956097074	8.757563192	6.893401633	9.534069336	9.112994061	7.838519602
MB-0233	72.43333333	1	7.40489968	7.423107888	6.522951988	8.346205302	6.303870762	9.745867362	7.308655288	10.01898351	7.293534842	7.554109293
MB-0234	94.23333333	1	7.633726358	6.578436883	5.979392865	7.973837269	6.948158342	8.472170095	6.707394101	9.427588974	10.06514747	7.806831923
MB-0235	142.5666667	1	8.010657297	7.277523815	6.018398998	9.199190352	5.974273091	8.841381111	7.285856946	9.108812156	10.50382652	7.210160694
MB-0236	205.0333333	0	7.872372353	6.159624962	6.445691087	8.51727967	7.114192554	8.968062755	7.105637504	9.857588949	10.58069171	7.247374583
MB-0239	85.56666667	1	10.70940031	6.752893509	6.111507644	10.0308897	6.21146383	8.849211159	7.317223599	9.317889957	8.709070389	7.002950317
MB-0242	199.1	0	8.484651052	6.342306529	6.440180324	7.875951999	7.019100875	8.486302387	6.972611218	9.478886469	9.129551752	7.525252281
MB-0243	149.7666667	0	8.919953781	7.215641749	6.533183754	10.36400488	6.466750617	8.693140829	7.010696705	9.429012939	8.83729887	7.552020538
MB-0245	164.7	0	8.308783679	7.391282516	6.671294372	8.748108386	6.807473496	8.215752247	7.061951261	9.552107441	10.74946685	7.549198239
MB-0247	185.6	0	9.435853453	6.803627595	7.125264854	8.402801121	6.67010533	8.413195343	7.698285406	9.989051052	8.930328907	7.350156098
MB-0248	71	0	6.482962271	5.560058846	5.991146813	9.924380071	6.836715637	8.353724166	5.933406077	8.826066137	10.24623017	7.611017421
MB-0256	200.7	0	7.33649432	6.188186534	6.426883315	8.464108333	6.238027216	8.298966627	7.174321929	10.27621932	10.54841106	7.084764832
MB-0257	91.73333333	1	8.941838355	6.568743721	5.979337699	8.24980017	7.192336535	8.363536003	6.536447269	9.655829194	11.43643363	7.732785184
MB-0258	86.13333333	0	10.09119625	6.53596128	6.073398136	9.832526143	7.229086774	8.622852176	6.60903676	9.263498004	10.59214151	7.452335518
MB-0260	169.8333333	1	9.72319596	8.275302482	6.295875853	8.972949841	6.552448139	8.67180039	7.352392507	9.498942742	9.213641222	7.568581006
MB-0261	90.23333333	1	7.268868312	6.330621368	5.881943575	8.055216672	6.8267769	8.201971595	6.507871782	9.449186097	10.11576008	7.764039769
MB-0263	176.0333333	1	9.262217671	8.789725691	6.29788758	8.973842767	6.513476843	8.358138439	7.085239443	9.946123032	11.12345673	7.382703447
MB-0266	90.66666667	1	8.841133996	6.999306726	6.646806301	9.571953398	6.00529946	8.120274366	7.167939757	9.216737614	9.335534721	7.92615419
MB-0268	28.5	1	7.404428382	5.73153096	6.143062305	7.36692629	7.68404382	8.975063675	6.877299279	9.544203668	11.04081993	7.119405686
MB-0270	337.0333333	0	7.64777017	5.970345152	5.847039306	7.440183168	7.590389429	8.813197885	6.053308929	10.04491855	11.7211064	7.796034015
MB-0272	122	1	7.719198372	6.330380631	6.366651619	9.099443517	6.98271442	8.258818018	7.141004508	9.511496949	7.863518822	7.3975761
MB-0273	186.5333333	0	8.624417743	6.482394009	5.801076958	9.115904799	6.40220992	8.223047859	6.198502318	9.149202088	9.099380774	7.764712662
MB-0287	94.73333333	1	7.264813064	5.979095287	6.13411489	6.798046134	7.154137077	8.992666341	6.878606519	8.874681441	8.039989658	7.448290537
MB-0290	199.5333333	0	8.257886745	6.665043515	6.346357509	7.962407212	6.578330737	8.151209529	7.042206326	9.3919056	9.689527264	7.547926792
MB-0291	39.2	1	8.75225912	6.177834649	6.282867309	8.26564114	7.095634563	9.751446791	7.250829483	9.615892956	11.77087993	7.573595466
MB-0295	164.5	0	9.145622475	6.932608283	6.378340548	8.683113847	6.889092972	8.867880557	6.836478884	9.832191505	9.34763055	7.68092101
MB-0301	122.7	1	8.186968842	6.633368751	6.251027771	9.74954275	6.773014834	8.771474863	7.346761052	9.652417606	10.05964628	7.240709072
MB-0302	84.2	1	8.710999327	7.412238056	6.593874833	9.615887712	6.498621493	8.53346074	7.156348063	9.489234425	10.59273092	7.161084397
MB-0304	111.5333333	1	8.567114298	5.613692579	5.549116023	6.662735746	7.444420648	9.593092245	6.33652894	9.265419591	11.31180683	8.560683219
MB-0306	42.96666667	1	8.897345035	8.070403667	6.366232309	7.891017102	6.65224465	9.317533119	7.186242269	9.421385204	10.69236519	8.215952108
MB-0308	183.2666667	0	10.2738317	7.975422431	6.894645936	8.6845598	6.791160859	7.9448554	6.449703932	9.135515203	10.38547722	7.682715892
MB-0309	42.33333333	1	8.275683255	8.505619502	6.09577801	7.530612195	6.536833191	8.599889094	6.866300085	9.345824735	8.482559826	7.652252374
MB-0310	185.1666667	0	10.44483785	8.147550686	6.375611884	9.660545198	6.768269377	8.332687801	6.806319248	9.861771152	10.50346151	7.220946311
MB-0311	151.1666667	1	7.751462979	5.951415235	6.454590809	7.334273882	7.687212008	8.927848156	7.217623271	9.409340224	10.17035367	7.235436785
MB-0312	169.6	1	7.823982179	6.966160843	5.967707458	8.470978479	7.112422856	8.248476663	7.061439579	9.130704225	9.786959628	7.630355455
MB-0313	184.7666667	0	7.365948538	6.773138613	6.00478536	6.944170247	7.829160638	9.372685572	6.947720266	8.938984507	10.30155796	8.080911017
MB-0315	186.2	0	8.956022007	6.426947017	6.780577068	8.621521617	6.733276494	8.806278484	7.405416935	9.236943308	10.96226596	7.589142672
MB-0317	151.6666667	1	8.310147418	6.136293327	6.515156016	9.1722463	6.728699284	8.676340935	6.591649454	9.42587946	8.397344229	7.903417896
MB-0319	40.7	1	7.102130249	6.267829714	5.702712191	6.968394806	7.245754604	8.02269546	6.404219545	9.36697781	9.150841991	7.608401587
MB-0320	63.73333333	0	9.993502915	6.475234896	6.719481178	9.794221032	6.47927033	8.37669096	6.854631896	9.81303762	9.660731828	6.920629634
MB-0321	174.6333333	0	6.200332012	6.639793849	5.525746614	7.19341736	6.388939843	9.277882719	5.888643367	9.393016347	10.99895437	7.999757668
MB-0322	50.53333333	1	6.950094005	5.732728112	5.575157841	8.280516215	6.99606459	9.395481203	6.654204622	9.097047104	10.84137812	7.415180405
MB-0324	144.9666667	1	7.532446579	7.219349468	6.220444659	7.855300102	7.111683404	8.883629634	6.80398906	8.503532365	10.22492176	7.415871295
MB-0325	177.5333333	0	5.873878721	5.474279709	6.260305908	6.672756324	7.535505993	9.347789644	7.206721028	9.51131904	7.667801172	7.670189436
MB-0328	125.6	1	8.477185453	7.186974294	5.973339386	7.970444201	7.601268827	8.327309817	6.333219164	9.045120924	9.631780462	7.585079622
MB-0336	170.6333333	1	8.368970098	6.217806176	5.964399704	8.368116987	7.814653685	9.306004499	6.718524929	9.462612989	9.535644106	7.305307927
MB-0339	26.73333333	1	8.733871732	6.733533821	6.040116226	6.963368792	6.271450066	9.00924162	6.196576535	9.154340403	8.149558294	7.395329917
MB-0341	173.9	1	9.218694609	7.763266089	6.152705733	8.789880414	6.843445438	9.032191771	7.589801475	9.459085248	10.74683709	7.331365212
MB-0345	72.66666667	0	8.922460259	7.669370514	6.274953678	8.808179065	6.264937792	8.645385707	6.365965638	9.148591019	9.998981684	7.704343066
MB-0348	122.7	1	7.105142371	6.088888182	5.760463423	8.229132133	6.5155572	8.31959417	6.079268171	9.152515928	7.145742442	7.91658929
MB-0349	146.0333333	1	8.325232719	6.13713117	5.819870467	7.785585102	6.752989146	8.784764289	6.649266745	9.33039461	10.50808328	7.914237774
MB-0353	41.83333333	1	6.976017248	5.709835469	5.963488367	11.01772519	6.900335932	9.164134894	6.483656451	9.466304967	10.56715012	7.269037393
MB-0356	213.5	0	8.643870165	6.972562814	6.075128753	8.633230297	6.80470868	8.68029982	7.136872987	9.529340884	10.14138407	7.177876694
MB-0358	32.86666667	0	9.737715259	6.688299837	6.33408232	8.552813596	7.366196924	9.093455424	7.122012085	9.231730125	9.374176071	7.552291602
MB-0359	21.6	0	9.474444609	8.990532344	6.322713815	9.441914895	6.634650114	8.663274578	6.703308207	9.312555133	10.56716625	7.501957755
MB-0360	132.5666667	1	6.55750152	5.813741993	5.719991226	7.866158314	6.974340474	8.994832905	6.522114833	9.28177735	9.30693078	8.056663869
MB-0362	47.03333333	1	8.41453381	7.488569504	5.934667127	8.611163666	7.116153727	8.897424143	6.264875087	9.324151354	9.560937011	7.998483752
MB-0363	89.9	1	7.242108053	6.886928271	6.426975441	7.339715569	7.485510039	8.684064403	6.814120482	8.779097295	10.36850575	7.537786791
MB-0364	176.6	0	8.926513947	7.70756019	6.235632561	9.188521188	5.943379471	9.255243069	7.131275334	9.205662227	10.68483773	7.144860972
MB-0366	64.23333333	0	8.551655592	6.617943194	6.214234947	8.762333595	7.040518665	9.190773816	6.496368854	9.153208993	9.277107553	7.867710844
MB-0368	61.9	1	6.299041145	6.592460105	5.447277681	7.30004054	7.248250616	9.350199923	5.893877042	8.630741341	9.549423037	8.293873402
MB-0369	144.3333333	0	7.172012999	5.839128803	5.718391686	8.251116834	6.779379674	8.041950219	6.037903871	8.888285778	10.49537146	8.073630302
MB-0370	93.5	1	7.61724155	6.663654151	5.636203319	7.345468135	7.806252365	8.504612715	6.640817293	8.55416107	9.850242646	8.14565702
MB-0371	131.1333333	0	10.31196596	7.883155656	6.161107945	9.519779008	7.13204731	9.793439255	7.000349299	9.687079923	11.49423953	7.919568956
MB-0373	27	1	7.420592409	6.0775707	6.200791111	7.358261998	7.457902216	9.394187001	7.042582729	8.475365775	10.13556951	7.618828609
MB-0374	1.433333333	0	8.657988336	6.357939902	6.68202652	7.517390746	7.252933154	8.840316253	7.16579057	8.480755129	10.90192634	7.186110039
MB-0377	134.3666667	0	9.740833951	11.29193544	6.67222236	9.594982433	6.306486422	8.338240954	8.297113823	9.770099849	9.704359199	6.844225482
MB-0379	135.6666667	0	9.579401399	6.201249134	6.702922815	9.451246029	6.946401293	9.162622218	6.952635271	9.549455941	10.2228464	7.604863387
MB-0380	69.33333333	1	6.296901586	5.717391253	5.871540202	5.777236948	7.862859595	8.708571544	6.585765431	10.05165973	11.32575554	8.281662841
MB-0382	136.4666667	0	8.8111475	7.833714266	6.621532819	8.832136178	6.86060587	8.834093594	7.049433368	9.563111547	10.80942305	7.31141425
MB-0383	85.73333333	1	9.792591059	7.020072578	6.502497483	9.299651847	6.315016552	9.09722575	8.01930605	9.927802249	9.785286225	7.899947827
MB-0384	61.1	1	8.970204003	6.153235642	6.810113543	7.507748945	7.187916622	8.393525321	7.085374483	9.104016762	10.29098293	7.802805906
MB-0385	36.43333333	1	8.267875568	5.830468774	6.086376468	7.919037323	7.194309819	8.367955358	6.634227317	8.061214277	11.42451925	7.762703078
MB-0386	138.1333333	0	10.74387302	6.971766553	6.116906996	9.517136295	6.887792286	8.62284919	6.718649964	10.27162989	10.00223111	7.720920136
MB-0389	96.96666667	0	7.714460473	6.239731806	6.414014087	6.573711692	7.510467546	8.71498488	7.52262756	9.372876182	10.51359813	7.850515778
MB-0394	64.23333333	0	7.720832277	7.591530843	6.107603845	8.899679974	6.506834244	8.430915981	6.93380055	9.301202497	10.11090173	6.965051682
MB-0397	57.23333333	0	8.634002844	8.900561392	6.398238676	7.688950771	6.480225594	9.037949236	8.255861542	9.498545411	9.805336784	7.344388923
MB-0398	43.2	1	7.590486886	5.966196228	6.403173558	7.820550997	6.995121246	9.54447521	7.904409691	9.100338122	10.12010173	7.295684465
MB-0404	63.5	0	9.234853672	6.809695737	5.919282022	8.203262461	6.983909482	9.905087858	6.667633027	9.227206427	11.21741704	7.511035749
MB-0406	96.9	1	8.031464218	5.761497048	6.341351362	8.335895487	6.847116645	8.061334467	6.868285699	9.58360121	11.09710789	7.079779715
MB-0410	63	0	9.324512142	7.773083082	6.582911534	9.355190388	6.883868289	8.224148207	7.2142736	9.867798916	7.96368509	6.859864577
MB-0411	139.1666667	0	9.154535506	6.15689128	6.194997019	8.308468103	7.196986946	8.107235069	6.567431502	9.301215966	9.952585828	7.134144817
MB-0412	136.1666667	0	7.852258708	5.701835026	6.094021347	7.337797066	7.017313132	9.77506859	7.208621583	8.556660199	11.12867507	7.625023054
MB-0413	140.0666667	0	8.168465969	6.020804736	6.341127413	8.267395376	7.119524185	8.03900554	6.481089404	9.149579348	9.85680979	7.278427818
MB-0419	104.3	1	8.169137935	6.304626243	6.110517562	8.385173611	6.73336358	9.052598707	6.576288912	9.694919854	11.04725386	8.018497655
MB-0422	33.8	1	8.473570141	7.804751381	5.885301732	8.432906578	6.772996563	9.184787364	5.877591098	9.567483485	9.984721534	7.76819052
MB-0425	24.4	1	7.470711488	7.027151183	6.355598762	9.263636426	7.205753381	8.726395552	7.315110556	9.474786134	8.867701059	7.20750304
MB-0427	116.1	0	7.03292203	8.073770142	6.699789481	7.645476731	7.353026834	8.590709953	6.548166485	9.050645953	9.91323105	7.491268596
MB-0428	55.93333333	0	8.090572116	6.863215356	6.506013692	7.959284617	6.98064055	8.791160545	7.137549316	9.241486599	10.16515422	7.264346267
MB-0429	74.46666667	1	7.481584819	6.291781985	5.86938262	8.189181783	6.945230522	8.547340862	6.628465789	8.049608791	10.52802023	8.400697956
MB-0431	85.13333333	0	9.607843934	7.36565905	6.290097174	9.667769753	6.251159413	7.986289303	6.808225624	9.108273589	9.829746797	8.027158511
MB-0434	45.5	1	6.995744298	6.098052054	5.769031039	7.368741622	7.729395706	9.408323248	5.904538484	8.468001238	10.25035782	8.097692493
MB-0437	90.56666667	0	7.901312531	5.928446382	6.225392846	8.641837962	7.410290534	9.195828261	6.766126358	9.386073922	9.747157981	7.77155524
MB-0439	112.1333333	0	6.14363981	5.627728283	5.745814088	7.658692714	7.559162428	8.29680243	5.76704564	9.09328778	8.140529556	7.696551475
MB-0440	100.8333333	0	7.671979693	6.722525742	5.717794663	8.395153727	7.980447791	8.218983113	6.640523852	9.136394827	8.051340964	7.494051817
MB-0444	55.46666667	1	8.246680707	6.160158708	6.35561253	8.359789203	6.962334821	8.400912655	7.200215409	9.456760059	10.24535517	7.552499671
MB-0445	132.5333333	0	8.588268974	6.659159769	6.436354042	7.036883383	6.43895001	8.403662501	6.793911999	9.569478803	10.35498571	7.492518318
MB-0449	112.5666667	0	9.432210784	6.143643546	6.30806422	8.305956051	6.504397776	9.252839002	6.827178149	9.950078108	10.55162845	7.52068918
MB-0451	50.06666667	0	9.324250175	5.839403	6.540363289	7.998445619	7.43607128	8.090669057	6.007086903	9.487367356	9.668130298	8.125723152
MB-0452	62.8	0	8.526640011	6.521782536	6.137837736	8.052827376	7.083838755	9.04130858	7.510609428	10.03731985	10.53331428	7.647951488
MB-0454	46.83333333	1	8.386433649	6.738903254	5.960477094	8.131552108	6.366340716	8.285198409	5.938119894	8.896987265	9.331899434	7.590241065
MB-0455	99.33333333	0	7.940283293	6.560845444	6.731936717	8.231414276	7.693618119	9.246368473	7.348152119	8.883043434	9.783933014	7.63020263
MB-0459	35.6	1	8.386875871	5.956857132	6.233579679	7.99574558	7.635900726	8.594986068	6.793442911	9.195065286	11.28815274	7.238054431
MB-0463	120.5666667	1	8.249946205	5.755779614	6.577023122	7.306885459	6.918550858	8.490809422	6.989069802	9.606178704	9.313574272	7.610848217
MB-0465	28.6	1	8.058332496	5.697444253	5.945887839	7.440428996	7.389469634	9.185718968	6.694399094	8.506349466	11.21308623	7.156782767
MB-0466	43.86666667	0	8.888319758	7.305194067	6.280473756	9.518493612	6.921421655	8.947782745	7.324187127	9.753957164	11.11609632	7.020475806
MB-0468	129.6	1	8.200882078	6.829263496	5.950942716	7.991321949	6.916985821	8.604843096	7.274394631	8.890810132	10.23047638	8.037759847
MB-0469	131.2666667	0	8.725354029	6.83344009	5.738578035	7.718525972	6.797204065	9.054578951	6.545214661	8.761573539	11.71129612	8.229665252
MB-0471	107.4666667	0	6.275599262	6.135200133	5.672293413	8.34465482	6.778173441	8.875105571	5.934136798	9.584756959	9.723023958	7.355426396
MB-0472	27.4	0	6.452331058	5.566536486	5.557839827	6.938406732	6.950370785	8.884681931	5.894682209	9.228473232	8.615801482	8.188640941
MB-0474	111.1	1	7.481411914	5.78930336	5.710901261	8.162269451	8.217356113	8.806455945	7.133865906	9.229217365	9.290258753	7.693552313
MB-0475	130.7	0	7.977073163	7.141667625	6.18957255	8.232146097	6.829210829	8.504028208	7.199208932	9.200289956	10.13192188	7.69699143
MB-0480	94.56666667	0	7.779039362	6.28989448	6.39349012	7.385389926	6.092683689	8.668900893	6.397997495	9.443185789	11.18270481	7.872066735
MB-0483	74.46666667	1	8.294451488	7.483144841	5.817373891	8.305282623	7.588711206	8.752448547	6.308126494	9.496159572	10.52458763	7.885396693
MB-0485	36.76666667	1	9.032368972	7.221803103	6.252661394	10.80911604	6.58834698	8.872618165	6.627272811	9.661045786	12.32509571	7.425333046
MB-0486	89.96666667	0	9.075016527	7.214013349	6.08189181	9.551526021	6.938397794	8.310832892	6.137970121	9.294922649	8.950011077	7.706897864
MB-0490	101.9666667	0	8.9603888	5.97109144	6.45071622	7.980880665	6.877893223	8.708380728	6.110003331	9.573283758	7.816746814	7.616246578
MB-0491	125.8	0	8.234691183	5.808406672	5.943344316	8.213512447	6.938683667	9.102107843	6.64556605	8.92749319	11.08536813	7.763549604
MB-0492	81.13333333	1	9.307942383	5.527378406	5.736938553	6.70425592	6.780048636	8.320323187	5.932520136	9.470025359	9.232774567	7.586843557
MB-0497	73.7	0	7.911227353	7.179281943	6.298467201	8.374875168	6.991138066	8.215822104	6.648511618	9.137672508	8.506805499	7.241420181
MB-0501	71.5	0	7.552203351	6.227445856	6.752501815	7.038241437	6.202856493	8.723966288	6.62362955	8.43117225	8.782649704	7.484566401
MB-0503	101.2333333	0	9.148085817	8.140168039	5.647035859	8.998663138	6.36011464	8.58290925	6.350481484	9.562933478	10.33544292	7.587185998
MB-0504	130.4666667	0	8.363245553	7.465758059	6.631173428	8.923012164	6.728367661	9.535099581	7.498622818	9.645678172	8.992980071	7.110346694
MB-0505	60.7	0	9.871772346	7.459308725	7.128182027	9.667045234	6.303235638	8.41642257	7.183743688	9.525102786	10.28297008	7.144596416
MB-0507	23.8	0	8.721614263	8.099197044	6.544794572	9.588569664	6.862612416	8.735467904	7.341948753	9.966895748	11.27121074	7.132396233
MB-0511	61.7	0	10.64408936	6.61180193	6.27089842	9.357761301	7.055210894	8.338058963	6.937972006	10.26371526	8.812239466	7.611366028
MB-0512	121.5333333	0	7.266980275	6.267510903	6.797317398	8.086761837	6.654188508	8.733973409	7.150104509	9.591889319	9.748659873	7.402623557
MB-0513	117.0333333	0	8.022933833	6.266880698	5.989446116	7.037676124	7.021610888	8.198904011	6.100955215	8.835311771	6.40810887	8.282026068
MB-0514	13.4	0	7.572639405	5.766068553	5.981332265	7.42449412	7.242025563	9.115899801	6.639787573	9.091337824	9.224119195	7.631486896
MB-0517	61.9	0	8.659681547	6.303837671	6.31947737	9.054591458	7.001419531	8.460369226	6.472770284	9.275463594	11.0543857	7.798707451
MB-0521	212.2	0	10.09641151	6.545355383	6.666256759	8.913988039	6.927198704	8.496707828	7.351184578	9.506214972	9.062519658	7.337450191
MB-0526	139.6333333	1	8.595992847	5.906804282	5.678367369	7.820392445	7.595662387	8.825651709	6.029599276	9.456524366	9.093160196	7.950220534
MB-0528	193.9666667	0	8.635469136	6.385489247	5.910775068	6.557310331	6.293081551	9.1466105	7.089404453	9.578489581	10.9882781	7.200594837
MB-0529	48.53333333	1	8.4251322	6.307699517	6.224165449	8.319563981	7.218774528	8.483165519	6.30422674	9.554465498	10.51067122	7.472456371
MB-0532	143.1333333	1	7.144539644	5.621855375	5.90962707	8.717190622	6.826825418	8.547159944	6.602294879	9.317491108	10.83156086	7.929872323
MB-0535	199.1333333	0	8.506500992	6.347206342	5.798646798	8.799351052	6.394384141	8.558623642	6.344566958	9.502797671	8.598981264	8.466884025
MB-0536	147.3666667	1	8.846953055	6.409957562	6.837755385	8.915082843	7.907587402	10.38511879	7.001102096	9.264795148	9.295480982	7.549459894
MB-0538	24.1	1	9.540536557	7.346443152	6.226651463	9.362305216	6.604212864	8.909896664	6.929550879	9.393610571	11.77911857	7.498429782
MB-0541	174.2666667	0	7.620508468	6.079799015	6.051624069	8.081581424	6.783693782	8.366569939	6.746675314	9.294922649	9.75055331	7.351861236
MB-0544	79.33333333	1	7.721951992	6.390798335	6.005078708	8.355286466	6.715541651	8.359124664	6.807998607	9.686657161	10.22829588	7.548701971
MB-0550	132.3333333	1	8.360033587	7.928389651	6.017910392	8.297951043	7.443014219	8.482162678	7.431680426	9.236943308	10.32105006	7.758580447
MB-0553	85.73333333	1	7.69628639	6.274585936	5.95409892	7.41661248	6.502339866	9.204224454	6.895260447	10.10886483	10.23715028	7.466409206
MB-0554	111.1666667	1	8.495574115	6.833368816	6.109511759	7.299171481	6.798838254	8.852813323	6.890967504	9.679406297	9.35945923	7.537425684
MB-0559	161.7666667	0	7.064401446	6.087493637	5.978523822	6.881927576	6.574680619	9.236119263	6.660348169	9.028352753	8.135632266	7.267442076
MB-0568	181.4666667	0	8.990819693	8.273525748	6.32687143	10.19933395	6.81032483	8.575576424	6.69661223	9.444899044	9.540231454	7.224424702
MB-0569	59.5	1	7.950171982	7.862632571	6.182625741	8.052571051	7.078293427	9.167263078	7.735370997	9.524445136	9.238222871	8.084250166
MB-0570	272.2	0	6.589023306	5.991254412	5.692709083	6.751920598	7.580753054	9.096099272	6.265741092	9.567897152	9.446688734	7.175025705
MB-0571	149.8666667	0	8.383588137	7.225366258	6.247150844	7.703260524	7.059016488	8.417841842	7.254649361	10.12635743	9.627400706	7.560989357
MB-0574	119.8	0	8.322215878	5.374559464	5.99381447	8.715112403	6.780164238	9.153694248	6.173213938	9.598156313	10.87288762	8.03932021
MB-0575	128.5666667	0	9.041374189	6.38221596	6.179001332	8.943963712	6.64026893	8.497768564	7.683121832	9.023938845	9.24464215	7.62913119
MB-0576	31	1	8.660237736	5.920572427	6.714071571	7.744251841	7.263622525	8.60423987	7.133842913	9.408145822	10.60800038	7.31907717
MB-0577	65.4	0	6.772254641	6.379238967	6.295010689	6.224016586	6.839600538	9.108316404	6.442889768	9.739584437	9.581254912	7.712054019
MB-0579	92.76666667	1	7.734391375	5.738358365	6.001440459	8.716617023	6.222309352	8.531402652	6.598515977	9.085047272	9.616008119	7.338041209
MB-0580	79.36666667	1	8.788379641	6.55946664	6.178373983	7.806949882	7.250240881	8.974240112	7.372025291	9.013478572	9.335574051	7.862350201
MB-0583	62.63333333	0	7.89846852	5.91154426	5.977901822	8.124820019	6.443712468	8.590487975	6.506704769	9.463843299	9.834600366	7.652270635
MB-0584	118.2	0	7.125356284	7.13657401	6.662567946	8.113352852	7.064491854	8.535974163	7.017426009	8.88682581	10.40825973	7.946903482
MB-0585	115.7	1	7.85510703	6.173136208	6.375146092	10.15661082	6.345266106	9.0329969	7.315263451	9.259145667	11.30201823	7.622456107
MB-0586	77.23333333	1	8.332105513	6.802805317	5.935022834	8.962160417	6.342453683	8.5437996	6.411913049	9.131500929	10.37797608	7.759921958
MB-0587	91.26666667	0	7.144407125	5.474090042	6.382908289	7.645410356	7.380108206	9.753733949	6.417686252	9.708436506	11.83133169	8.413010443
MB-0589	125.8	0	8.641286459	6.014263385	5.943004555	10.15740458	6.940746983	8.296935658	6.795470448	8.902939528	10.73436027	7.010281401
MB-0590	72.46666667	1	7.69301156	5.642007104	5.712182889	7.009806668	7.695013324	10.79500708	5.767238015	7.979583998	12.08795797	7.676348493
MB-0591	119.4666667	1	7.063259682	5.926174535	5.997858831	7.862719436	7.5374171	8.89210288	6.87415265	9.840325142	10.3867205	6.874748317
MB-0594	44.23333333	0	7.908046568	6.08639197	5.807063546	8.407728251	6.790409711	8.85043654	7.212154223	10.13680561	9.685470734	7.745033056
MB-0596	107.1	1	8.59367505	6.705374578	6.815556755	8.713604516	6.627114124	8.832023683	7.176379865	9.727501659	10.32334713	7.384454583
MB-0598	89.36666667	1	9.126572145	6.011772555	6.419896407	9.556056921	6.888118855	9.94471893	7.452067831	9.330426595	8.733391897	8.336893598
MB-0599	123.2666667	0	8.215142356	6.708640744	6.802317224	8.951995254	6.016557364	8.915313083	7.160520202	9.323110766	9.563113825	7.195602888
MB-0600	111	0	7.354749485	5.644351416	6.141570813	8.339264446	6.708108429	8.262310282	6.392876471	9.065540974	9.41449322	7.574314557
MB-0601	29.66666667	1	8.567030946	6.483085322	6.053977462	7.372076538	6.956589475	9.279570638	7.292280034	9.525265205	10.14810013	7.489167023
MB-0603	121.9666667	0	8.336343169	5.871738405	6.000347598	7.994222083	6.336588761	8.709187555	6.106117354	9.647034351	10.41365178	8.09297287
MB-0605	114.6	0	9.414591636	7.079739965	6.732990431	8.741202539	6.289765137	8.013344534	6.897635047	9.792680818	10.6002535	7.318605084
MB-0606	27.46666667	1	7.039627408	5.523957049	6.102769673	6.381741704	6.77868869	8.349065067	6.674320902	9.746593329	9.011194767	7.36392777
MB-0607	87.83333333	0	9.657457052	5.868243513	6.515334122	8.737490216	6.847190327	9.28581695	6.914549109	9.442225614	11.11059627	7.224570607
MB-0609	98.7	1	7.596101858	7.173562236	6.098491442	7.575949558	6.571632459	9.281393027	7.19251889	9.181382658	11.62913596	7.5802828
MB-0611	104.5333333	0	8.526767663	5.933182256	6.16836085	8.405290792	6.566676296	9.669353377	7.83234263	8.037795142	11.00845044	7.940831917
MB-0614	119.3333333	0	8.601539115	7.27925896	6.455765253	9.323908368	7.362591439	8.310435404	7.086334406	9.02699832	9.570439887	7.802896856
MB-0616	29.03333333	1	7.832895823	5.980072983	6.147374043	7.581158827	7.445825529	8.167635312	7.127298929	9.851594269	9.358265808	7.349642782
MB-0618	101.9	0	8.095116478	6.374204452	6.235902119	8.722535035	6.99393319	8.484148832	6.943998054	9.143548772	8.24923483	7.54202667
MB-0621	33.56666667	0	10.80700412	6.374026675	6.899211453	9.524179989	6.288390157	8.068252854	7.335034469	9.569133085	10.18660288	7.363644619
MB-0624	64.03333333	0	10.31419538	8.68478286	6.759745699	9.646626702	5.483602018	8.222430506	6.716186562	10.03082218	9.190197425	7.340620366
MB-0626	35.53333333	1	6.917986557	6.218579527	5.808295635	6.773738492	8.05053484	9.762750242	6.720751831	9.163548376	10.67137861	7.856956327
MB-0630	86.8	0	6.933397039	6.65443495	5.486045848	7.019723436	7.343184035	8.753838339	6.243494399	7.514618585	8.878434704	7.51673858
MB-0631	47.43333333	1	9.562849122	8.795071095	6.824191392	8.943168471	6.976115885	8.2393489	6.487736854	9.046296663	6.94732085	7.857412278
MB-0632	56.5	0	10.09082921	6.404238211	7.119196211	8.986466193	6.529144533	8.64863778	7.363474661	9.806953643	10.41911235	6.848480025
MB-0636	32.63333333	1	9.954824001	7.581346138	6.161178875	8.924905659	6.819185206	8.760434712	6.958473	10.37984515	9.633857675	7.869014681
MB-0637	80.66666667	0	8.880133002	6.731384877	5.914747509	7.961728035	8.271445026	9.862573319	7.092966067	9.798973752	10.44795851	7.545294778
MB-0642	84.2	1	6.324239826	5.549269633	6.070296095	10.30897421	7.089872421	8.159366667	6.192552972	9.494897914	10.83438074	7.378790009
MB-0646	15.16666667	1	7.500314172	6.402653786	6.058954443	8.67400558	6.992242474	8.88232078	7.08191844	9.759308347	9.854689118	7.121308095
MB-0649	61.43333333	0	8.327756139	7.298491064	6.576736309	9.16960705	6.902591207	8.862252612	7.48436491	9.526153722	10.61342994	7.11118555
MB-0650	25.53333333	0	8.977619665	6.297021171	5.965874306	8.304293769	6.966052307	8.439791369	6.801709571	9.963307802	9.77982578	7.676705085
MB-0654	69.4	0	7.303332572	5.80627389	6.175269465	8.297041642	6.711961772	8.293096881	6.507668298	9.032265358	9.292550184	7.517252924
MB-0661	20	1	8.123007748	5.806813725	5.837320476	10.01712354	6.572948887	8.374052624	6.272047302	9.160449127	8.494219048	7.643691399
MB-0666	24.33333333	1	7.577368766	5.784411899	5.825460885	10.66530215	6.726713168	11.18449591	6.416367894	8.12389775	12.50307053	7.829493814
MB-0877	14.43333333	1	6.769603161	5.637797974	5.548749225	8.337309129	8.17018431	8.674058876	6.729230156	9.196075472	9.606914522	7.891176564
MB-0880	1.233333333	0	6.623586988	7.193234682	6.612324736	9.824859934	6.530984706	8.456375107	7.116214029	9.110327052	8.494085963	7.092474973
MB-0882	42.36666667	1	7.465044867	5.944255849	5.9498847	6.892041067	7.867288329	9.259019257	6.690567905	8.270167647	9.822494049	7.313229605
MB-0884	93.66666667	1	6.58843943	6.396907849	5.86990042	6.969718689	7.981700053	8.636849772	6.389923231	8.738615218	10.49705275	7.459897173
MB-0891	149.4	0	9.800324621	7.122870907	6.66412583	10.05551464	6.004499793	8.248358161	7.115611348	10.16462356	10.06610397	7.333296699
MB-0895	43.1	1	7.692022138	6.579300597	7.683682455	7.852723416	7.540718642	8.963058601	6.739033731	9.84651428	9.728638352	7.8229886
MB-0899	175.8	0	8.940805289	6.992492076	6.438421989	9.794006045	7.105652372	8.4818628	7.108739535	10.28586102	8.882653557	7.292483784
MB-0904	144.7	1	8.761132312	6.271845111	6.578596838	9.330264838	6.799275649	8.678924331	6.665248287	9.576096176	9.68050912	7.08542112
MB-2513	59.7	1	8.533401348	8.008674372	6.419743792	9.172377178	9.063781501	10.68058734	7.66369493	9.831421333	9.124051844	6.905152832
MB-2536	47.9	1	8.523309558	8.228940094	7.11697619	9.326973359	6.662306724	8.674627017	7.608887144	9.898930469	9.644782527	6.442245686
MB-2564	285.4333333	0	8.599435966	7.46705661	6.610466063	9.645187708	6.937980292	8.130116382	7.502421941	9.495920775	10.0368044	6.994506287
MB-2610	280.7	0	9.739584437	7.077254926	6.470329698	9.190941031	6.748657183	8.10627466	7.359107786	9.397938685	10.10279555	6.595875021
MB-2613	163.4	0	7.165113347	6.824727339	6.560229933	7.450592947	7.420620945	9.769180423	7.586961867	8.866561968	10.13556951	8.418601825
MB-2614	64.93333333	1	8.625049405	6.998578175	6.191728957	9.477092825	6.765042462	8.290059936	7.271866259	9.253300997	10.50828055	6.810821334
MB-2617	89.1	1	8.145389961	7.278212742	6.287575276	8.328034497	7.266389201	8.593534317	7.601164749	9.456709398	9.961239955	7.241582351
MB-2618	89.1	1	7.49571745	6.555342188	6.305777751	8.399332743	7.627826711	8.677822611	7.436230613	9.065314107	11.42937784	6.849062545
MB-2624	128.5333333	0	9.554707115	7.288898957	7.390277426	9.755985954	6.786853917	8.404419737	8.120127436	9.971746367	9.342898268	6.714687166
MB-2626	193.7	0	9.153355522	6.381694176	6.608389169	9.215702913	6.981045894	8.597376317	7.753277838	9.562581636	12.14645181	7.355455365
MB-2629	279.1	0	7.012824904	7.600320998	5.884270077	7.99355691	7.26705431	7.783500299	6.798592186	9.545506808	7.587536953	7.359493891
MB-2634	274.0333333	0	8.007689953	5.794341743	6.053602694	7.959879373	7.855913572	8.616031051	6.91343393	9.83991909	9.530427739	7.568570903
MB-2642	45.16666667	1	7.776709528	5.780865234	5.960649152	7.2510977	7.437514761	9.119625164	7.368350674	8.924746039	9.363076784	7.439080961
MB-2669	73.7	1	8.57135354	6.215937927	6.823858237	7.662931726	6.750759159	8.658787373	7.305670862	9.00725942	10.51706998	7.434181019
MB-2686	177.2666667	0	7.118060209	6.233659383	6.017449138	7.281107556	7.798250022	8.798588647	7.86187543	8.924666746	11.72574959	7.669595879
MB-2705	163.7333333	0	7.194812469	5.88177462	5.776161858	7.520156524	7.170078055	8.646756149	6.654399681	9.808122243	10.77678607	7.56147441
MB-2708	133.2333333	1	8.466495034	8.167377558	6.278434575	9.045387053	6.982778155	8.887401221	7.353186927	9.68621721	9.606746734	7.079775498
MB-2711	201.4666667	0	8.229274582	6.008399421	6.209012123	9.056679144	6.496718862	9.458329258	6.696013646	9.832191505	9.026309108	7.183464171
MB-2712	234.4333333	1	8.315121435	6.666550521	6.299926481	8.23939792	6.613231505	8.363857051	6.903143616	8.661322233	9.427588974	6.53629306
MB-2721	251.6333333	0	8.827095265	6.285079028	6.164686946	8.823828573	6.757355614	8.804776033	6.422077659	9.492617211	10.5391981	7.477397297
MB-2725	236.9333333	0	10.69984189	8.949068268	6.358016434	9.575944499	6.126940148	8.68362988	6.761330966	10.07599533	8.488456915	7.508456804
MB-2728	51.4	1	7.997643535	6.253708741	6.045807784	7.695178453	6.61184994	9.110276659	7.350608138	8.583300911	10.12553435	7.29062798
MB-2730	133.7333333	0	7.244210927	5.934637386	6.302240092	7.374775871	7.716457299	9.888455995	6.855616371	9.233116998	11.15990316	7.735807529
MB-2735	274.5	0	7.780874194	6.293672856	6.539872681	7.63885988	7.142287477	8.621818883	7.25246135	9.060061904	10.81644112	7.632638638
MB-2745	168.9666667	1	7.82971233	6.845597031	6.021294603	8.498075921	7.539604503	9.044124661	6.494176118	9.445170947	9.263201062	7.568463935
MB-2747	234.3333333	1	6.968981433	6.119775896	6.398891264	8.155927009	6.905304643	8.449174778	6.981925846	9.190100215	7.957587769	7.248172416
MB-2749	97.76666667	1	10.21200144	7.755222627	6.421417106	9.748465694	6.286149419	8.267648533	6.951116131	9.77562232	9.344176647	7.240566172
MB-2750	145.4333333	1	8.77006178	7.79439915	6.708839752	8.456399873	6.867213084	7.997585148	6.850586751	8.931608354	10.67811236	7.133838676
MB-2752	81.93333333	1	8.702612783	6.85386693	6.325256581	8.655335613	6.822906874	8.832650168	6.577820136	10.10731372	10.35559318	7.586613115
MB-2760	118.0333333	1	9.190814085	7.370428532	6.058012952	9.453493293	6.803647929	7.982882532	6.890184141	9.258540355	10.06420992	7.498689015
MB-2763	275.6	0	7.144265486	6.800810729	6.117154404	8.374719352	6.949531306	8.372153621	6.623433392	10.32403626	11.37114336	7.257551347
MB-2767	271.3333333	0	7.875839178	6.165106964	6.428403429	9.313540919	7.343576635	8.848833303	7.290252598	10.10398557	11.29091009	7.813980065
MB-2769	160	0	7.388536223	6.845655123	6.279257158	8.734725251	7.007655535	8.300765841	7.175133508	8.694640088	9.042537874	7.455427856
MB-2770	274.3666667	0	8.421216678	6.031205906	6.462278387	9.325627525	6.309306426	8.268041166	6.866750016	9.709953935	10.18227105	6.977881206
MB-2772	150.7333333	1	9.0930846	6.717063817	6.707158667	9.187087026	7.270862138	8.509998055	7.83996534	9.558558711	9.695915446	7.07545347
MB-2774	131.6666667	1	7.955795325	6.375748614	6.61451489	8.624694238	7.068293393	8.372872375	7.434603499	9.824708105	8.226677684	7.364753559
MB-2779	275.2333333	0	7.685489236	6.130294416	6.242927409	9.57579136	6.765625647	9.350304123	6.794795855	9.657918288	10.95997552	7.628728827
MB-2781	40.43333333	1	8.158652703	7.357437803	5.794503246	9.779154185	7.407219417	9.690362399	6.720607087	9.539005195	11.26039264	7.576894845
MB-2786	68.26666667	1	8.550147774	6.412861319	6.436571484	9.708118714	6.766896813	8.36709042	6.905852572	8.949310291	10.37749349	7.711955148
MB-2790	116.9333333	0	7.43846472	6.256190066	6.501325416	8.205702344	6.99208095	8.202530439	6.868196416	9.02947233	9.712134914	7.184890265
MB-2791	271.9333333	0	9.37966125	6.053535219	6.158745497	8.995972135	6.58024613	8.286533238	6.791126224	9.746873676	9.446653654	7.504151399
MB-2793	267.2333333	0	6.602255366	5.776153624	6.132260138	6.989564029	7.525463167	8.190318647	6.755378904	9.280964524	6.059382948	7.138364708
MB-2797	252.9666667	0	9.187517399	6.640108995	6.322466412	8.480928745	7.431201656	8.158358493	6.784334357	8.627678512	9.920197936	7.267500669
MB-2801	271.2666667	0	9.006487441	6.452374401	6.44647006	9.056127348	6.900941264	9.406151505	7.374959157	9.63922126	9.962281611	6.89660115
MB-2803	85.86666667	1	7.763219526	6.293840408	5.964176517	9.908845181	6.981866693	8.061597563	6.612136818	9.881738584	10.53695128	7.193768079
MB-2814	231.0333333	1	7.400456463	6.215150453	6.376837081	7.779392031	7.185983184	8.478710167	6.795483724	9.900906393	10.10707409	7.45889358
MB-2819	270.5666667	0	8.175639818	6.319111358	6.520384153	8.020744286	7.011227761	8.369654924	7.227746236	9.269961583	9.768628326	7.179417575
MB-2820	254.6333333	0	10.26447498	6.442209234	6.501935413	9.962144001	6.770271299	8.370863265	6.972242401	10.3677601	10.54222049	7.275527948
MB-2835	55.03333333	1	9.689894689	6.122901987	6.595476027	8.084812139	6.816721839	8.784943575	7.323890448	9.0802747	9.988601756	7.041569197
MB-2838	270.3	0	9.019674002	7.029525025	6.504036684	9.069424196	7.501190446	8.511038052	7.36646787	9.279641044	9.034973645	6.617124812
MB-2840	269	0	9.212701441	7.857677649	6.441890726	9.139231693	7.01512731	8.663662736	6.86493042	9.680189156	10.7893585	7.250626055
MB-2843	231.5333333	1	9.400624576	8.513550733	6.550919049	10.04205555	7.171363799	8.609110879	7.702696419	9.75088844	11.40540117	6.786189222
MB-2844	146.7333333	0	7.270305829	6.111487754	6.181497162	8.518057009	7.854927271	9.245566054	7.11673637	8.598759947	9.86239912	7.341584697
MB-2848	227.7333333	1	8.882946859	6.527177628	6.639773831	8.434972356	6.466930582	9.281629384	7.069054608	9.175971204	9.080133876	7.006753979
MB-2851	159	1	9.096458619	6.45247079	6.925102431	9.563848538	6.524651839	8.815874023	7.246164962	10.426405	9.92658542	6.918791204
MB-2853	269.6333333	0	8.535588025	7.305778339	6.644400117	9.114153832	7.208815097	8.277022554	7.096856898	9.256893323	10.20544772	7.107572196
MB-2854	270.4333333	0	8.781353454	6.768660205	6.414604657	9.310173093	7.122588765	9.017469177	6.694785539	9.327728813	11.64336584	7.548105116
MB-2858	141.5666667	1	7.187162194	5.839652472	6.342544111	7.271850952	7.541837606	8.843547775	7.377479514	9.247936356	9.304189017	7.076810484
MB-2863	258.3333333	0	7.998138651	6.19210043	6.514125122	9.333276327	7.172409626	9.560110231	7.132858115	9.434079987	10.45512114	7.159892772
MB-2867	269.3333333	0	9.922693653	6.956299118	6.705772239	9.769939934	6.862352182	8.417956707	7.535720058	9.943399473	9.400433467	6.918126247
MB-2901	218.3	1	5.904705754	5.914844452	5.787716757	9.468802491	7.913791581	8.238100552	6.210520218	8.114907201	10.04770408	6.980517201
MB-2916	266.9333333	0	9.143341541	6.637991245	6.922629027	9.791135233	6.538950481	8.40261345	7.405949881	9.804832696	9.272237615	7.893735722
MB-2919	240.0333333	1	7.811115882	6.208555836	6.052685412	7.240568122	6.349603279	8.25978945	6.496053408	9.488917589	8.834516428	7.493653295
MB-2927	263.7	1	8.926925061	6.248246714	5.95409892	8.55352477	6.649006652	8.805192618	6.750357251	9.3803819	11.00845044	7.787748601
MB-2931	228.1	1	8.129912796	6.490478806	6.181493311	8.978474431	6.409641962	8.73263288	7.421481409	9.590623379	8.9603888	7.462999048
MB-2932	108.4333333	0	6.776693398	6.657650234	6.124137024	8.480481294	7.25015595	8.692954792	6.6906215	9.063482434	11.51909736	7.31333066
MB-2933	161.9333333	1	7.929186975	6.683639446	6.365651397	9.024083224	6.689509581	8.647245404	7.292513904	9.392454307	10.35042764	7.256688031
MB-2939	101.2666667	1	9.010096909	6.062366753	6.42374203	8.866161813	7.9883148	8.398978311	7.835715133	9.801045024	9.505327673	7.060265153
MB-2944	27.2	1	9.240143877	6.626393137	6.224016586	8.575720674	6.951869614	8.789590742	7.329062197	9.145344091	11.01327185	7.486196477
MB-2947	112	0	8.902358489	8.426585496	6.888359237	10.51173789	6.802086452	8.403434422	7.594985507	9.819751014	10.94382132	6.680292455
MB-2951	263.3666667	0	9.900906524	6.830827654	7.059030553	9.021075648	6.953674115	8.403004018	7.553662353	9.873981719	9.793207998	7.044457616
MB-2952	189.1	1	9.64263221	6.38172796	6.468386493	8.047801613	7.349415848	8.489446408	6.560931528	9.348161198	11.0984257	7.229138551
MB-2953	30.13333333	1	8.500945753	7.104613616	6.285463297	9.204159443	7.436195731	8.54850496	7.795652721	8.789013417	9.433188553	7.239658046
MB-2954	5.5	1	6.815667418	5.824901896	5.695680862	7.765310536	6.733711699	8.222247209	6.511937988	8.081313616	8.621634998	7.387093788
MB-2960	222.2	1	8.31679131	8.36250241	6.362336856	9.165530145	7.08666394	8.19711014	7.125127947	9.832127797	8.285199681	7.419601015
MB-2966	265	0	8.880406302	6.237980893	6.754605588	9.318532173	6.749504427	9.021629434	7.235883938	8.83586053	7.603817578	7.125734317
MB-2969	172.9	1	8.650880715	7.443761992	6.904489044	9.186425548	7.14345137	8.355918611	7.708554992	9.921777371	9.2672483	6.879731484
MB-2970	252.8666667	1	9.435013758	7.081083464	6.462607707	9.227033679	7.096230808	8.168971006	7.627894534	9.44456664	9.621218356	6.873002937
MB-2971	264.2333333	0	8.238076795	8.640943416	6.606713783	8.520175982	6.89942957	8.598072359	7.53946154	9.98993209	7.607861817	7.173869526
MB-2977	110.6	1	8.739774631	7.943268872	6.695648192	9.217963322	6.112972456	8.512915349	7.365854106	9.79014842	10.12771839	7.295296028
MB-2983	180.8333333	1	7.393001177	6.249243068	6.245215488	9.296347192	8.13436631	9.485052531	6.913055613	9.177568995	10.67753431	7.901451275
MB-2984	261.2	0	6.793553128	6.20051947	7.162274215	8.028225712	6.886053536	9.333905694	7.098444174	9.779711064	12.07809994	7.537086676
MB-2990	260	0	8.799351052	6.300510938	6.290975969	9.028648477	6.697663913	8.743356002	6.452902007	9.683707378	9.913083989	7.446182534
MB-2994	254.5	0	10.17825604	7.984651046	6.633318031	9.639565656	7.189670525	8.921844625	7.19632086	10.12676396	10.05052694	7.374452447
MB-2996	191.2333333	0	7.740878978	7.633323252	6.633794993	8.151760515	6.531590013	8.885783605	7.410218821	9.397765	9.825326465	7.181271627
MB-2999	262	0	8.771100321	5.981550185	6.011427467	9.314972317	7.28298288	9.575204904	6.40866376	9.136632771	10.20218992	7.914500175
MB-3002	140.5666667	1	9.317492433	7.176814219	6.463582271	9.561385989	7.075870551	8.120172501	6.975585006	9.380116004	9.453717764	7.602511029
MB-3005	253.0666667	0	8.11706624	6.155956528	6.193226701	7.742936325	6.414591903	8.718167198	7.131106702	8.75773208	8.800954694	6.91656918
MB-3007	114.9	1	7.412380344	6.117123914	6.514706663	9.684161444	7.133767519	8.59638645	6.814775048	9.156107502	10.93150377	7.439796524
MB-3008	149.6	0	9.724046203	7.393078146	6.576023756	9.233333758	6.240961842	7.844750278	7.174182132	9.786748968	9.576491943	6.811323451
MB-3016	258.8666667	0	8.002093148	6.781713821	6.098386477	8.596623099	7.189483324	9.460440183	7.001063136	9.548160127	10.95359111	7.344722484
MB-3021	217.5666667	1	8.810907283	6.439972542	6.426620114	8.411910617	6.947081726	9.148722183	6.62419421	9.655117879	9.87622506	7.109014157
MB-3026	261.2	0	7.906330512	6.322205545	6.12108583	7.727590871	6.726135879	9.077489986	6.946613413	8.258447511	10.45004053	7.282159074
MB-3028	42.56666667	1	8.137173324	6.264464749	6.306548308	7.839419624	6.961439092	8.108643444	7.322199584	9.295724857	9.353284701	7.721481663
MB-3032	250.1333333	0	9.734671673	7.029490502	6.860565127	9.496700979	6.579424942	7.894019143	7.348720158	9.732717225	9.454712035	6.780351046
MB-3033	70.4	1	8.706782949	7.553067395	6.490260174	8.970638906	6.582775102	7.985695178	7.215496734	9.477792079	10.34967677	7.132838143
MB-3035	260.7333333	0	9.415451172	5.943158958	6.306060839	8.35144919	6.621872314	7.983617121	6.931772728	8.435827647	9.338562285	6.852470349
MB-3037	98.83333333	0	9.214537142	6.810468077	6.197078122	8.486291795	6.517279676	8.20638294	6.708446495	9.817296874	10.54749742	7.404360563
MB-3049	259.9666667	0	10.54914099	6.674445779	6.459280496	9.399233153	6.696438553	8.937473285	6.605117281	10.00056655	10.98945571	7.868457941
MB-3050	255.1	1	7.456728625	5.808737895	5.958272653	7.021257382	6.478849063	9.396972514	6.159855437	9.206431143	10.53037933	7.607459563
MB-3060	44.6	1	8.03289435	5.667418225	6.341177149	6.063472808	7.338105042	9.266489668	7.083280349	8.590797327	11.17729239	7.555908466
MB-3064	165.1666667	1	8.691772501	7.294420575	6.996625223	8.726112712	6.721954319	9.131825156	7.418647978	9.472296916	9.573234958	7.235603409
MB-3079	149.6	0	8.146343573	6.541764279	6.171745645	7.291777643	6.873188122	8.98520907	7.131254671	9.383624952	10.43151456	7.50279461
MB-3083	81.1	1	6.346766874	6.337871942	5.892876982	6.748748724	7.654733032	8.942704458	6.476875902	9.959024399	11.15083105	7.627420085
MB-3088	256.5	0	8.605555942	6.368674283	6.083356822	7.19916364	6.798222405	9.272300395	6.378064482	9.178762368	6.09795913	7.161679748
MB-3092	152.3333333	1	6.786792778	5.783950357	6.19054037	6.883467466	7.160146912	8.506281891	6.129254409	8.263436617	10.58237866	7.257894727
MB-3102	258.3333333	0	6.826597986	5.917902452	6.403173558	8.40768758	7.062278721	9.324129161	6.698392059	9.365043941	10.4883159	7.493570311
MB-3103	28.73333333	1	7.731497471	6.025646776	6.866215785	7.555122265	7.099600773	9.451782037	7.405862871	8.583880662	10.56331794	7.166773334
MB-3104	75.36666667	1	9.12671529	8.492178682	6.125652921	8.455346457	7.009825421	9.111784517	6.239943731	9.009100715	11.35062231	6.913437897
MB-3105	252.3333333	0	7.013007649	5.742319551	6.663138894	7.757443506	6.50566302	8.682461209	8.023318721	9.744416411	8.483483079	7.742261896
MB-3110	100.7333333	0	9.260584537	6.250572156	7.612101197	8.67614504	6.587007196	8.961213612	7.653115127	9.461327376	11.26402811	6.932143841
MB-3121	131.3333333	1	9.128948002	6.643829066	6.452023857	9.183113651	6.944322211	8.421611055	6.843771661	9.701075101	10.30579193	7.243117191
MB-3167	136.9333333	0	7.003370982	5.790881603	6.157198401	6.709406011	7.118796369	9.408842442	6.556233399	8.46318432	11.31231663	7.51077277
MB-3171	219.6666667	1	8.0481714	7.867819272	6.49619743	8.573618268	6.615406397	8.748966638	6.875883968	9.372741084	8.810245046	6.963844237
MB-3181	178.1666667	1	7.670714312	5.603439666	5.709400208	9.67073298	6.797486752	9.109511021	6.282671465	8.6041104	11.45790083	7.731360508
MB-3222	23.93333333	1	8.170356956	6.01734258	6.475135709	8.6038218	6.415061901	8.375929849	7.529475009	10.10455423	10.23585405	6.951537792
MB-3228	252	0	8.23345388	6.926715079	6.659618036	8.550901717	6.492707476	8.096643235	7.332576959	9.206519396	9.562874113	7.439033523
MB-3235	236.1333333	0	8.384283785	6.368563545	6.606797268	8.521366069	7.584127078	9.481777585	7.283099487	9.849613572	11.10494643	7.462683152
MB-3252	99.7	0	9.834633581	6.581723738	6.795099227	9.946123032	6.179304254	8.457484818	7.104031385	9.720194288	9.949627936	7.09486354
MB-3253	55.83333333	1	7.395034346	6.041825885	6.073539459	5.836708679	6.850323746	8.278937932	6.994264173	8.13856978	8.069301947	7.658686362
MB-3254	123.9	0	9.099267683	6.214512539	6.510610886	8.913806396	5.865403555	8.344316335	6.825098255	9.764456992	9.829715433	7.129839967
MB-3266	51.2	1	9.264361322	6.218628076	6.710037819	8.092446677	6.783604629	9.232141545	7.403220944	9.666427355	8.931329429	7.32149359
MB-3272	22.66666667	1	6.803555457	6.030492798	5.866980982	8.286260655	6.838105958	10.04453953	6.82941529	9.265256731	11.79756494	7.578387695
MB-3275	41.53333333	1	9.205583562	6.162054596	6.76600754	8.334012529	6.863474629	8.800874196	7.539183104	8.300889517	10.79113866	7.0733596
MB-3298	242.5666667	0	9.699877623	8.44923276	6.846993963	9.872900303	6.677496098	8.215826429	7.639689784	9.077068252	10.1747657	6.611532855
MB-3300	247	0	7.709951747	6.156604635	5.781251138	8.541268058	7.153672277	9.337395035	6.346087458	9.70589944	6.454177594	7.895830537
MB-3301	248.7666667	0	7.44079759	6.068628882	6.654168271	9.245420097	7.078921273	8.431028143	7.777226091	9.491394883	9.267625234	7.459078478
MB-3303	243.9	0	7.416371688	6.603767421	5.975965496	8.93689147	7.199053064	9.009204858	7.432493173	9.528046165	9.396311984	7.460013691
MB-3328	191.1333333	1	7.854411732	5.896624434	6.458483924	8.846692862	6.442772766	8.520584982	7.304985079	9.59849894	10.79053363	7.607973134
MB-3341	148.7666667	1	7.689679353	6.037380837	6.210414148	8.487677791	7.085365575	8.715095287	7.1690975	9.403842152	10.72057623	7.040507067
MB-3344	241.2666667	0	9.368818137	6.893750401	6.458757599	8.730748033	6.667583385	8.072543637	7.106041338	9.533756015	9.85808946	7.146949799
MB-3350	227.8	1	6.316626267	6.010805372	6.35806709	6.960143173	7.078060577	8.306643163	6.531732368	9.42652139	10.16515422	7.550327948
MB-3351	241.8666667	0	6.102606975	6.071287328	6.182740898	7.43645473	6.861242109	8.78233396	8.470696945	9.877591219	9.123411335	7.912018133
MB-3357	38.03333333	1	7.579473435	5.613798117	6.061344941	7.696682838	8.350463617	8.927691368	6.640502164	8.86808151	10.93208633	8.125208525
MB-3360	26.76666667	1	7.806569194	5.792543559	6.366078348	7.86233739	8.310226111	9.124611033	7.195647794	10.14489604	10.33106376	7.170028702
MB-3361	68.2	1	8.331453859	5.740712172	6.211951586	7.382713635	7.419464752	9.207611051	7.301277198	9.638120885	10.91192355	7.492011151
MB-3365	241.6	0	6.498559901	6.499869071	6.345214475	7.609466298	6.304511233	8.900667462	6.605258208	9.178350355	7.063803677	7.466945479
MB-3371	241.2666667	0	8.336074334	5.709653973	6.065482942	7.915641142	7.112096587	8.911471636	6.837969471	8.922706949	7.208459009	7.165427342
MB-3378	87.53333333	1	8.383138144	7.861027925	6.844066343	9.888260634	6.646373707	8.336873267	7.830074094	9.453881407	9.988962468	7.126415999
MB-3379	113.8333333	1	7.912188477	6.215337174	6.266914495	7.982367987	7.02702009	8.529609324	7.285988718	9.637763945	10.81898584	7.173391372
MB-3381	236.6333333	0	9.998518586	6.457534402	6.812410158	9.518144927	7.004699591	8.963858495	7.422796948	9.751724953	10.42539926	7.121788562
MB-3382	136.2333333	0	8.059489466	5.703640197	6.559350995	8.455943957	7.623923355	9.708544151	8.045231225	9.251379416	10.8749359	7.101135928
MB-3388	228.6	1	6.886830249	6.426739124	6.095365313	7.093162519	7.073961154	8.938483977	7.295622912	9.49171646	12.03334473	7.073088157
MB-3389	240.7	0	6.371519053	6.140081059	6.398980596	6.237122342	8.100142888	8.463459902	7.045515826	7.931343448	10.58155911	7.000284112
MB-3402	50.03333333	1	7.82556222	5.652419751	6.185497349	8.088452386	7.098574043	10.50288299	6.691390806	8.982963133	11.20280706	7.312948761
MB-3403	138.3333333	0	8.235590619	5.959489313	6.43210925	8.12977978	7.056573605	8.629413755	7.700303593	9.638777368	8.623211639	7.128202201
MB-3412	228.8	0	8.597321471	6.155778251	6.515768822	8.345318567	6.513438195	8.058926732	7.503040972	9.90941201	9.318610031	7.005330029
MB-3417	103.4666667	0	6.647893353	5.674901908	5.945448416	7.188037498	7.251443707	8.736105406	6.467845567	8.261616185	7.715999462	7.480659945
MB-3430	219.7666667	1	8.471810631	6.451933781	6.936988994	8.070052913	6.852231634	9.632649999	7.330658103	9.870867135	10.77696156	7.180545239
MB-3436	50.76666667	1	7.056264322	6.363388858	6.241713589	7.657950231	7.174164186	8.786255162	7.17726226	8.949880786	11.51130754	7.478941526
MB-3437	108.7666667	0	8.09099562	7.032356206	6.149394444	6.392785353	6.881758784	8.978099617	6.445995679	9.299515623	7.619955571	7.86843651
MB-3439	188.7333333	0	8.693454238	6.116580298	6.651861027	8.798523869	7.035011872	8.186409669	7.046807151	9.688681171	10.29325237	7.1885017
MB-3450	240.4666667	0	7.961519936	5.941364977	5.528721413	7.31321225	7.209850889	8.394354719	6.707670969	8.796009156	10.12771839	7.928057719
MB-3462	234.2333333	0	9.055021451	7.013721354	7.044858223	8.934785351	6.647736628	8.674670826	7.31979602	9.583919203	8.786502294	7.371515278
MB-3487	237.1333333	0	7.599686267	5.728599922	6.095163191	8.47144018	7.185352987	9.176766591	6.37272159	7.829022145	9.469517978	7.587466423
MB-3490	102.4	1	7.313200164	5.8543322	6.488910612	7.988788685	7.533301059	8.988974321	7.132230992	9.75000082	6.958047819	7.117004166
MB-3492	118.1333333	1	8.498598009	6.306923495	6.007768035	8.340200111	6.618302442	10.15587888	6.820509305	8.644034116	10.06600611	7.461163932
MB-3506	240.8333333	0	7.46778568	6.18264821	6.510628801	7.800652525	7.961488761	8.985085403	6.726447132	9.144700897	10.14363987	7.034595339
MB-3510	59.6	1	8.415202541	5.988587114	6.742395058	9.227404193	7.076068345	8.918239108	6.461937921	8.554952825	10.05920479	7.110616884
MB-3525	236.7	0	9.208017803	7.3781352	6.167221221	8.568509484	7.550012811	8.992018258	7.176452779	10.23224144	10.89061282	7.892164525
MB-3545	232.7333333	1	10.47199434	7.28689716	6.87670572	9.577050176	6.682612513	9.147406323	7.343584992	9.419478574	9.913165202	7.529431661
MB-3548	234.5333333	1	7.063622437	5.912329632	5.90878129	7.798247231	7.727400755	8.640362121	6.977526407	9.663574335	9.416378861	7.43161793
MB-3600	214.7	0	6.015118044	6.149256949	5.606529689	6.507519761	7.747741575	8.171801999	7.169320416	9.051008166	8.292117922	7.633447195
MB-3614	235.4	0	8.293013721	6.033779955	6.82373595	7.517945701	7.132449691	8.924291791	6.995020245	9.665017994	10.93751674	7.324772187
MB-3711	222.1	0	8.082642895	6.051370502	6.557784303	9.135779009	6.963689977	8.622651929	7.097759978	8.980847627	10.28636374	7.113220527
MB-3748	228	0	9.624679387	6.674215738	6.494675864	8.756787008	6.672927375	8.884063198	7.008389405	8.844575295	7.913549882	7.019967453
MB-3754	92.73333333	1	9.423876902	5.845182759	6.855359778	7.880688421	7.156572096	8.791986559	7.553328324	8.913992332	11.27062709	7.080285671
MB-3781	224.5666667	0	7.998709915	7.022601842	6.231914985	8.770976868	6.50609767	8.992830614	6.943879952	9.448034763	9.904902731	7.77315267
MB-3797	228.3333333	0	7.089501061	5.679681743	5.599970266	7.169934084	6.220633402	8.528851539	6.460810031	9.813700812	6.666312811	8.065761371
MB-3824	126.4666667	1	6.835350027	5.853848425	5.762700096	10.06784526	7.443619358	9.484169749	7.001451598	9.514321738	11.10030265	7.324603724
MB-3838	134.4666667	1	6.640336094	6.253633339	6.033344777	7.567399462	6.896001201	9.184123259	6.461779944	9.427535927	7.767704038	8.063883452
MB-3840	287.2333333	0	7.76944926	7.053105121	6.051794885	7.637089558	7.724217532	8.595736247	6.512936904	8.780140057	9.746683094	7.05357712
MB-3842	226.0666667	0	8.035093741	6.244717126	6.360047173	8.0028502	6.702482052	8.833013975	7.405700325	9.129514135	8.713695692	7.89464076
MB-3850	72.3	0	9.388549535	6.418910542	6.901819981	8.644834149	6.347912291	8.702670313	7.637981034	9.848577491	8.583681429	6.960336896
MB-3852	225.5	0	7.649795132	6.150729811	6.564641162	7.554655525	7.163959964	9.123310988	7.218707092	9.293993009	10.0005432	7.530832104
MB-3854	99.23333333	0	10.23314706	8.505391061	6.68899285	9.263341608	6.311032385	8.313721688	6.97475826	9.951160022	8.504529621	7.175901525
MB-3871	172.8	1	10.37184671	9.191798657	6.818169956	9.353568993	7.086525034	8.599495151	7.18153792	10.14336474	10.72701098	7.841996765
MB-3874	186.4333333	0	7.993319612	6.081055954	6.57937261	8.304422349	6.726616739	8.503982564	7.571979309	9.404120186	9.837150837	7.266477185
MB-4000	28.06666667	1	10.24426351	5.666002572	5.646809314	9.109961884	6.677108297	8.559945504	5.756588818	9.700589136	8.539217327	7.514682954
MB-4001	49.66666667	1	7.516538161	5.84661925	5.914557582	9.287225159	7.333887651	8.827942777	5.926337209	8.788938859	10.48411666	7.392846537
MB-4004	256.8666667	1	6.334725521	5.662507149	5.759082607	8.494721346	7.285433133	8.605321637	6.499592365	7.770291474	11.65644009	7.282967134
MB-4008	44.73333333	1	7.89863958	5.620705827	5.991081453	7.640510018	6.624044154	8.759963219	6.817616645	9.103894181	9.340102817	7.473771226
MB-4011	193.1666667	0	7.0602447	5.895761732	6.23817502	7.66873127	7.028805974	8.706853839	6.957330212	8.901185828	9.6987348	7.410727402
MB-4017	139.3	1	6.116461457	5.579942928	5.804489185	7.517284454	8.303232689	8.294425041	6.44532891	9.073067204	11.54519403	7.908502739
MB-4018	105.6666667	1	9.1265386	5.971118289	6.321653176	9.863306106	6.865298403	8.108932511	6.724718106	9.623475043	10.94382132	7.578208859
MB-4033	15.2	1	8.742547976	6.540753659	6.706086666	9.055021451	7.114472862	8.854559033	7.047695927	9.717192438	10.41747635	7.923893971
MB-4091	281.3666667	1	8.090720617	6.075096889	5.948956719	12.43176215	6.541731463	9.760602352	5.523165552	9.589273408	10.76838506	6.678659394
MB-4120	217.1	1	6.850384471	5.525329757	5.659853926	8.240956077	7.169214841	8.732459437	6.161817533	9.102219704	8.814127528	6.989314537
MB-4139	165.4	1	6.525926857	5.684313604	5.961512568	6.968467798	7.626250684	8.676964415	6.287208671	8.186591785	10.18227105	7.837107265
MB-4140	114.5	1	6.302424694	6.034888656	6.657076552	8.289997116	6.7579513	8.655790856	6.184334011	9.663837237	9.759151556	6.492451674
MB-4148	63.03333333	1	6.974613644	5.843731573	6.124031087	8.7481865	7.490040581	9.620049402	6.416010124	9.814103233	11.09447868	7.41628261
MB-4154	49.56666667	1	7.126261923	5.993311894	6.980776702	6.910363611	7.173643106	9.255826541	7.538740911	10.04675552	9.784813347	7.480989834
MB-4173	160.3333333	1	7.069886722	6.180866478	6.100952318	8.180887168	6.886665251	8.94401306	6.479287491	9.87622244	9.2407814	7.176414574
MB-4212	330.3666667	0	8.9603888	5.904036931	6.728138905	8.170096297	6.174837178	9.211997165	6.386641223	9.409693178	10.31734346	7.429862788
MB-4213	84.5	1	9.980146695	6.114608149	6.65840572	6.957803162	6.469452543	8.414210732	6.776263964	8.294902389	8.269579487	7.562683674
MB-4230	115.6	1	8.205058512	6.172758327	6.433918704	8.277839971	6.807829628	9.866645554	6.465292999	9.166276665	11.30783514	7.533257302
MB-4233	36.36666667	1	7.363048687	5.709530856	6.044990146	6.943275106	7.917018195	9.474929282	5.96185246	8.59300394	10.56946842	7.244347736
MB-4234	253.5333333	1	7.79315526	6.036268027	6.177820113	8.96664425	7.115375239	9.099798069	5.986680563	10.65789605	9.381530427	7.042411274
MB-4250	100.1666667	1	8.492129007	6.216523442	6.496992784	8.334078787	6.510992004	8.93611534	6.79543789	9.537608851	11.21363201	7.874082637
MB-4264	163.2	1	8.723850179	5.754847582	6.37918506	8.114907201	7.586866566	8.999167453	5.921541692	9.280667615	9.428819284	6.856353697
MB-4266	33.9	1	7.50767692	6.611024084	6.572897548	10.90684245	7.504543348	11.18640391	6.184861894	9.253775293	11.36698984	7.038658636
MB-4274	59.93333333	1	7.152758574	5.75337489	6.226226578	8.143224879	6.859327264	9.077634862	6.389775409	8.727621616	12.14645181	7.900909721
MB-4282	34.1	0	8.080483019	6.024589527	6.048744593	8.021608457	6.715353858	9.091169296	6.562562292	9.879391454	11.37531397	7.706872084
MB-4283	174.8333333	0	8.494219048	6.162103723	7.086601912	7.256554671	6.696117175	9.160423701	6.333424869	9.253802449	11.00374089	6.541737115
MB-4292	335.6	1	7.023318138	5.845185604	5.533670048	7.218353013	6.86279388	8.938158277	5.194659671	8.090133535	11.79688542	6.855615371
MB-4293	219.1666667	1	7.760153726	6.145252561	6.975089692	7.957782378	6.707443311	8.769325698	6.318354083	8.843684694	9.385514633	7.030506139
MB-4306	234.7	1	6.059898434	5.669762757	5.840405437	6.910196229	6.689071254	9.063498312	5.846963609	8.659109081	10.2598785	7.167643111
MB-4310	265.5666667	1	6.098441321	5.507474196	5.598751166	6.606988948	7.39643042	9.927032649	5.443551328	8.361665795	6.726316635	6.118772224
MB-4313	300.7	1	7.777717273	6.470280002	5.953109324	8.867903822	6.284979438	10.08408105	5.826258987	9.527294322	9.686657161	5.649220057
MB-4318	17.13333333	1	6.737636627	6.132688305	6.261344764	7.49709247	8.014970577	9.003659658	6.511925745	9.190941031	10.2977418	7.47958065
MB-4322	196.4666667	1	6.817273596	5.667592448	6.448853562	8.007910818	6.827322191	9.318779009	6.394072709	9.544203668	10.99476344	7.383547959
MB-4323	126.6333333	1	6.735786644	5.955040452	6.016201409	8.411928298	7.151477713	9.446041441	5.879009594	9.747157981	11.60201184	7.096280528
MB-4328	199.2666667	1	8.883161341	5.836638867	6.015980472	9.550833718	6.524708741	7.980236234	6.603274205	8.78972594	11.34285422	7.565865594
MB-4329	168.2666667	1	8.078230098	6.34270005	6.552439326	10.80238606	7.175243457	8.776431505	6.582005779	9.471287017	8.826271276	7.546558403
MB-4333	207.9666667	1	9.608338027	6.522273554	6.40581877	9.174662208	6.190818642	10.74959894	6.41983264	10.23939482	13.0109962	7.13608704
MB-4339	173.6	1	8.081641374	5.662019133	6.107542653	6.873077309	7.176479245	9.288797421	5.680820038	8.996554857	10.07090411	6.467077688
MB-4342	232.7666667	1	8.872098022	6.072780366	6.623707598	8.31574731	6.37817782	9.4358475	7.147521439	9.574616747	11.17538031	7.323921609
MB-4353	128.5333333	1	7.973298926	6.269208659	6.085763403	7.99407682	8.179281979	9.008333552	6.643004349	9.949627936	11.43676738	7.365847909
MB-4357	114.0333333	1	7.194661519	6.562873258	6.786763434	6.900750074	7.20246889	9.735653489	6.223786532	8.787132449	10.73050735	6.41534057
MB-4368	119.4666667	1	7.172850115	5.924395931	6.550115558	8.084512399	6.972731461	9.114064122	6.155974318	9.421501801	10.31734346	6.231211947
MB-4374	42.56666667	1	7.253072067	5.714745004	5.585173079	7.259564011	7.079735053	8.632251228	5.766098493	9.083461478	8.265256921	7.145999714
MB-4390	164.3333333	1	7.230296683	5.893006907	6.332274875	7.676130921	6.706983877	8.649648968	6.545545185	8.823828573	9.901092263	6.905987848
MB-4418	307.6333333	0	6.873466347	5.89643423	5.525184131	6.90514988	7.538173256	9.102241784	5.438359297	8.552802552	10.21716309	6.73737087
MB-4421	264.7666667	1	6.6530457	5.633527904	5.78821041	6.986240524	7.532699787	8.959257675	6.040324598	7.845648008	7.74397845	6.98629887
MB-4442	296.8666667	0	7.714035668	6.174446812	5.829142381	8.576447998	7.897587149	9.751231912	5.908891634	8.76391383	8.463444087	6.50212659
MB-4529	126.4666667	1	9.55729866	5.746937082	6.449166931	8.261616185	6.142929978	8.603589307	7.148062839	8.679277234	8.773691246	7.118197291
MB-4557	279.8	0	8.064763694	6.425207953	6.40581877	8.181260244	7.053268416	9.548410159	5.837521724	9.162533956	9.496429576	6.737616275
MB-4564	210.4333333	1	7.427494191	5.796899805	6.119850646	7.137195754	7.039609931	8.931754798	6.055617711	9.601377601	10.52463046	6.838887921
MB-4578	197.3333333	1	7.146051986	5.662049835	6.159734812	7.316661186	7.144360021	9.519500183	5.860548496	8.888285778	9.181767536	6.90293152
MB-4591	41.16666667	1	7.014852729	5.7636977	6.186549726	6.583190548	7.727923204	8.883804099	5.926221461	9.537608851	10.7910614	7.372686032
MB-4593	140.2333333	0	8.528205088	6.444193818	6.290403452	8.282992264	7.130363863	8.826752233	6.10009102	9.310151871	9.534992703	6.773726903
MB-4598	119.3666667	1	6.578428051	5.657935857	5.978760773	7.878062666	7.380130775	8.591647318	6.25306502	9.266545191	9.776112722	7.038886311
MB-4599	191.1666667	0	6.382487088	5.661687887	5.761831836	8.077032433	7.56170376	9.105017544	5.786901122	8.754985143	8.882910646	6.838531721
MB-4602	122.8	1	6.540015089	5.821399246	5.688080516	6.952951743	8.321434764	8.645355999	6.097443467	9.038043189	10.77964784	7.53959579
MB-4607	121.7333333	0	8.15897502	6.286535321	6.451043234	8.572178453	7.293170482	8.854533586	6.349159261	9.646726907	10.56715012	6.838125109
MB-4616	90.13333333	1	6.472714638	5.981690857	6.43606813	8.744415682	6.90017101	8.858151526	6.046987258	10.05155101	11.41585024	7.240138081
MB-4618	267.4	0	7.158754231	5.758041033	8.42529374	9.780613411	6.966399683	9.001750261	6.756222837	8.931747462	9.666796104	6.952811574
MB-4623	292.0333333	1	7.789820449	6.116630419	6.53248081	8.940804482	7.757431049	8.810381516	7.080942532	9.230343974	10.37673568	6.925537859
MB-4627	186.6333333	1	8.040481266	5.549878144	6.244042201	8.180217043	7.122237788	8.604940479	6.419733802	9.595827742	10.1818852	7.344656507
MB-4630	95.83333333	1	6.276062175	6.189103139	5.750092467	7.244420616	8.216159253	8.719267564	6.129687579	9.210540151	10.99476344	6.534522528
MB-4633	318.2	0	9.371665435	6.099991208	6.40496603	8.838085363	6.624555362	8.784111927	6.821227618	9.876896691	8.956450755	7.856871173
MB-4634	109.6	1	8.2034653	6.223250789	6.396526332	7.729709648	7.459178585	8.950702885	6.595951036	8.842270904	9.768628326	7.289025239
MB-4639	119	1	7.467701873	5.910178996	5.81109497	8.039461235	6.731350077	9.593005164	6.14114223	8.737005993	11.7012715	7.390055782
MB-4641	148.5666667	1	8.997106247	5.959715807	6.259860808	9.229696073	6.33873425	8.674960959	6.610683433	9.471011751	10.56795889	7.701690734
MB-4642	285.7	1	7.510474667	5.677385852	6.210340503	8.85427694	7.154853926	9.670647702	6.471775022	9.131662719	11.89201482	7.4488891
MB-4644	90	1	7.135426579	5.671139405	6.096104717	7.010729293	7.921816344	8.814415531	5.936312495	8.364630466	10.08518564	6.995157175
MB-4648	168.5333333	1	6.740400902	6.765733612	6.466653884	8.904396579	7.818657984	10.79681311	6.573921388	9.031885721	10.6923392	7.305918895
MB-4649	16.83333333	1	7.39729588	5.899244925	6.177916883	7.441211792	7.427303583	8.796688996	6.03470437	9.835420408	11.69892019	7.395987
MB-4651	30.3	1	7.475187959	6.046956553	6.092409998	7.283064159	7.539327884	8.870588513	6.940495259	8.538236548	10.33551492	7.85227092
MB-4654	64.3	1	8.69224227	5.813230488	5.896843776	8.680809165	6.981454121	8.632509361	6.707260292	9.283964301	10.24156465	6.995968283
MB-4655	99	1	7.772576462	6.206750714	6.442202788	8.534286551	7.415359936	9.696223285	6.373595932	9.260037345	11.59535023	7.008343326
MB-4661	234.2333333	0	7.760484267	6.499413858	6.218654915	7.963570266	7.115179429	8.784869463	6.58410956	9.55514301	9.706466918	7.270601821
MB-4665	260.2	0	6.433820263	6.022173614	6.199647618	8.794770643	6.82370372	8.953938306	6.387763497	9.629244863	10.33097171	7.208473981
MB-4666	111.5666667	1	8.776640479	5.976757792	6.296766674	9.140528734	7.211605854	9.038742668	6.602188176	10.01937014	12.30022713	7.37243187
MB-4669	119.4666667	1	6.846969846	6.07129715	6.289808421	8.164240629	7.221086608	8.549037566	6.148133296	9.032419181	10.26447498	7.244788548
MB-4670	67.8	1	6.85150376	5.667948172	6.417232358	6.563884585	6.862405735	9.289897254	6.35451328	8.450065912	10.41105127	6.619587901
MB-4671	34.7	1	7.837750669	5.625567798	6.094347857	9.780613411	7.362875766	8.593064952	6.111590154	9.902760039	10.14517726	7.040689731
MB-4672	220.9333333	1	6.945432315	5.849544215	5.737910101	7.610898038	6.911390427	8.916845032	6.003296561	9.698085319	10.28636374	7.45266105
MB-4673	87	1	7.413039025	6.111965264	6.448189408	7.704173281	6.925023602	8.632009243	6.638200378	8.286103454	9.598602488	7.355513146
MB-4674	81.06666667	1	6.049912089	5.466453015	6.068828346	6.883729029	6.702331172	8.994318831	6.156788705	9.047228916	8.865663194	7.251885692
MB-4675	263.0333333	0	8.015040424	6.249692333	5.873906467	6.877660287	6.884673895	8.314176032	5.931040992	8.572880416	9.291604178	7.626330981
MB-4681	251.8	1	8.78413646	5.960449967	6.738368933	7.785485576	6.975651059	8.952388008	6.577332282	9.235921127	11.32397393	7.25731139
MB-4682	139.5333333	1	7.000665182	5.601523302	6.048343256	6.576648902	7.160246471	9.086141235	6.201503159	9.185049125	11.80164846	7.684429732
MB-4685	43.3	1	9.63050505	5.735219431	5.586804086	8.323101989	7.287766128	9.481962343	5.929130259	8.499712048	9.986307895	7.917219978
MB-4686	48.43333333	1	8.826067111	5.982458589	6.76808957	9.350694454	6.810810225	8.495836946	6.939694846	8.668989426	10.17879179	7.475487435
MB-4687	74.1	1	7.974622482	7.311095517	6.90957431	7.55108639	7.248832099	9.456778625	7.064528586	9.25590762	10.74577158	7.896305807
MB-4688	85.3	1	6.493097936	6.52053907	6.237298114	6.838990501	7.728228396	8.941061376	7.195859267	9.610232963	11.77884015	8.141625334
MB-4691	282.5666667	1	6.994129096	5.47690719	6.603896143	7.554835464	7.089829178	9.300112908	6.82601096	8.86808151	10.68579136	6.727564795
MB-4692	107.2666667	1	6.97121946	5.899204767	5.661677983	8.750435903	7.145879862	9.024194644	5.562657061	8.064763694	8.641837962	7.02559661
MB-4698	170.6666667	1	9.530572219	6.08568314	6.686836177	8.70640653	6.511476746	8.471369235	6.59954721	9.719573619	9.447002273	7.121708207
MB-4701	127.5333333	0	7.897370355	5.790556078	6.153124651	8.240629155	6.783180728	8.993462569	6.409539022	8.77757199	9.724270014	7.796877369
MB-4702	300.8666667	0	6.661447185	6.714327677	5.948303375	6.943003457	7.876110179	10.3063675	6.615618323	9.435102491	10.07318073	6.95084426
MB-4704	64	1	9.341120624	6.472748636	6.809127963	8.868116248	6.719554469	8.958346024	6.572654375	9.936236028	10.38852138	7.369305857
MB-4705	213.1	1	10.64428604	6.031517938	6.284074367	8.98472024	6.357762988	8.263705868	6.416190184	9.492617211	10.1376079	7.399018319
MB-4706	55.66666667	1	7.637726644	5.964792645	6.23422482	8.097397602	6.531167058	8.633466439	6.814026088	9.149202088	9.332427022	7.414822772
MB-4708	227.9	1	9.152471225	6.247501502	6.511534613	8.693305965	6.981318891	9.273334108	6.865489888	9.971625378	11.46894954	7.255375072
MB-4709	146.7666667	0	8.714236798	6.306787913	6.354876655	8.69555707	6.485156993	8.388993211	6.377080467	9.398306962	11.28489191	7.07425926
MB-4710	57.66666667	0	9.6312386	6.205916394	6.568662057	8.654560617	6.087125106	8.830828303	6.557185912	9.318521815	10.60781939	7.516918987
MB-4716	76.13333333	1	8.746239208	6.302208785	6.617287194	8.905928904	6.95858205	8.695795861	6.824891641	9.324613574	10.48452692	7.086887496
MB-4719	81.56666667	1	7.335742992	5.789113566	6.254968879	7.031736927	6.671576821	8.288265984	6.543715512	9.395859317	10.12884987	7.451577707
MB-4721	23.73333333	1	8.092281506	5.859320682	6.234752316	8.26181984	6.708771928	8.768619598	6.223094938	8.256963667	11.42021739	7.490919096
MB-4722	86.1	0	7.388783331	6.170386609	5.818378383	9.133538848	6.702124013	8.075862597	6.259550398	9.095070386	8.501706422	7.750065993
MB-4723	211.9666667	0	7.813245122	6.934297682	6.060164222	7.784617541	7.180734833	8.759497129	6.172494123	10.49773135	10.30883324	7.181002292
MB-4729	28	1	8.202986227	6.222414418	6.099998277	8.184204545	7.706983923	10.11383977	5.842589569	9.415981326	11.48206473	7.847060944
MB-4730	131.3	1	7.625498333	5.653256578	6.03602729	7.080161407	6.626997309	8.760644877	6.17427648	8.290129476	10.17252116	7.590625492
MB-4735	297.8	0	9.882704885	6.326024435	6.092340638	7.602845605	6.060165296	9.257320721	6.110473906	8.726514118	9.98644224	7.168600493
MB-4737	122.2	0	6.779752175	5.755506728	6.276554735	7.488191864	7.293897197	9.109252674	6.804244785	9.21572715	11.04213654	8.146383322
MB-4739	161.6666667	1	7.864129026	5.89208193	6.266442585	7.585663774	6.694217345	8.643752862	6.915395713	9.929365034	9.776652193	7.790217709
MB-4741	56.5	1	7.846298851	6.123045592	6.096540458	9.777545665	7.167478795	7.790309487	6.380938251	8.680002726	9.844320342	7.459051841
MB-4742	83.13333333	1	8.413888917	5.568713978	6.321002209	8.664306956	6.714736204	8.87528183	6.061665209	9.181767536	10.45294854	7.591848538
MB-4744	153	1	6.648579255	5.840609733	5.931377374	7.649721941	6.887694581	8.476657349	6.110555079	8.74336346	7.432522652	7.557323952
MB-4749	51.46666667	1	9.102985949	5.766364196	6.007194902	8.618068326	7.132456906	9.03366886	6.157096736	9.575706273	10.59674638	7.780094972
MB-4750	37.73333333	1	8.861143767	5.805901093	6.15689475	8.672517312	7.495967503	8.434511811	6.464926109	9.168564959	8.335375296	7.859628062
MB-4752	125.2666667	1	7.719079754	5.656740556	6.336930928	7.013634483	6.338549266	8.571051374	6.681657194	8.406276504	8.604839515	7.703745935
MB-4760	124.8	1	9.460065155	6.154729294	6.712561787	8.375248724	6.908268214	8.645603994	6.855581395	9.68226968	9.698284839	7.432228138
MB-4762	252.1	0	8.034219797	5.763426116	6.66548179	7.778987157	6.745973652	9.007318228	6.562958113	9.667578887	10.32730354	7.620004504
MB-4764	245.5	0	8.880146422	5.932651455	6.75014238	8.403517804	6.798945774	8.570144408	6.678319497	9.720674446	9.822450475	7.357796754
MB-4767	47.13333333	1	8.249879106	5.527475363	6.368531803	7.199842804	7.035074149	8.65385724	7.239997949	8.194554265	10.96809512	7.394328544
MB-4771	297.2333333	0	8.062032615	5.794119921	6.216038324	8.347588269	6.446751334	8.53652646	6.592177901	9.004431022	9.554525294	7.914896133
MB-4778	206.1333333	1	8.576998523	6.73257973	6.695700753	9.526624364	6.631773641	8.767381474	7.018627718	9.987442872	9.07287069	8.118378724
MB-4779	101.5666667	0	8.356126882	6.7412209	7.052937639	9.091237448	6.621257814	8.566674154	7.046127558	9.387839696	8.802399596	7.355954293
MB-4785	121.6666667	1	7.572270689	6.39313948	6.398864253	7.095688913	7.456528964	8.930355801	6.738488377	8.94172558	6.745296538	7.011981556
MB-4787	81.06666667	1	9.165285155	5.867075155	6.062352897	9.139956953	7.197825734	9.390951738	6.416113146	9.776142755	11.4466819	7.363598593
MB-4790	70.46666667	1	9.13429034	6.267511533	6.556358937	8.956520348	7.288759945	8.945422379	6.697220364	8.733359302	9.64108694	7.329109828
MB-4791	173.8333333	1	6.983061548	6.040945082	6.476458396	6.685794804	7.167207302	9.054666598	7.646446694	8.772698683	10.03197305	7.416206208
MB-4794	45.5	1	7.391050158	5.876086605	6.104305618	9.04460851	7.292040414	8.462311024	6.405308549	9.528608093	10.05338963	8.326037582
MB-4796	128.2666667	0	6.961487873	5.413480763	5.68297143	7.819865998	7.524682861	9.396809597	6.49063476	9.077384079	10.30825088	8.157724857
MB-4797	99.36666667	1	8.741470322	6.576987996	6.229364075	8.693275343	7.408408635	7.843741245	6.678927263	10.29503785	11.4704574	7.608529049
MB-4800	110.9333333	1	7.264924388	6.02221829	6.307521103	7.426480005	6.72485013	8.380943066	6.477265516	9.801821031	10.17941471	7.442566902
MB-4801	130.3666667	1	7.358311932	6.109597706	6.133191223	7.183819021	7.278678378	8.876714403	6.82548908	7.748668131	9.246989415	7.891353432
MB-4802	43.9	1	7.148995528	5.488534233	5.668292703	6.54336724	7.395910723	9.075409791	6.377007188	9.401460456	9.741103044	7.686590496
MB-4805	129.8	1	10.65631663	6.034013974	6.52291539	8.625026967	6.48342825	10.06464149	6.78809377	9.154470321	10.76408521	8.135160958
MB-4806	201.7666667	1	7.936136613	6.009777283	6.516233574	8.279602049	7.160305196	8.286359097	7.406216541	9.607455396	9.371247523	7.473870457
MB-4818	76.23333333	1	8.835828162	5.603168314	6.445053114	6.651256179	7.178340443	9.1341356	6.293635542	9.210812131	9.162637533	7.788192528
MB-4820	57.3	1	6.212619659	5.979548564	6.272046871	6.223733439	6.368724393	7.980980711	6.539780708	8.700589809	6.484509503	7.285735612
MB-4822	91.63333333	1	7.84805618	5.873073697	6.135734868	8.891117393	6.747631091	8.682071817	7.278896177	9.303721595	9.660239533	7.523323022
MB-4825	214.4333333	1	9.234798485	5.652524833	5.944364932	7.064694964	7.047889219	7.975779446	6.267192224	8.968062974	8.541326628	7.826477791
MB-4827	45.7	1	8.221729548	6.061519562	6.439158136	7.978853993	6.461583376	8.787600465	6.268973484	9.938283887	11.43052476	7.261584553
MB-4828	42.5	1	6.802958566	5.658057068	7.282206423	7.696757347	7.799272659	7.914045092	6.519367418	7.876470689	11.45790083	8.818120693
MB-4829	176.2666667	1	9.967590094	6.113199174	6.001410352	8.917449862	7.18911832	8.734092795	6.542424344	9.63865313	11.1702577	9.017337811
MB-4832	141.7333333	1	9.248298031	5.824452907	6.373405515	7.554094974	6.727004954	8.795412619	6.798423419	9.799154021	10.15027459	7.966598547
MB-4834	36.16666667	1	7.063447166	5.629674989	5.975851601	7.051503175	8.047633134	8.570590431	6.312960292	9.337002932	10.2927097	7.865639313
MB-4838	200.7666667	1	6.157408595	5.802489638	5.57619354	9.239081033	7.982452254	8.476854465	5.60713219	8.851206363	9.891054908	7.550844754
MB-4839	299.4	0	9.375749391	5.961687353	6.47002043	7.771038433	6.979243526	8.319675522	6.848933284	9.655161578	8.284230064	7.837732662
MB-4843	265.1333333	0	7.810600372	6.223191676	6.638296061	7.743962042	6.934482344	8.405617265	7.207488257	9.509068326	9.493915223	7.635895687
MB-4845	25.46666667	1	7.474525466	6.738053415	6.012681465	10.5010092	6.210715491	8.627298811	6.224663608	9.525948543	9.258968994	7.384152257
MB-4846	101.6333333	1	7.294387046	5.905378994	6.077364915	7.732430293	7.761770364	8.918327799	7.206627644	8.699854735	9.84292636	7.669649807
MB-4849	45.33333333	1	6.955514761	5.632575565	5.753750295	6.970588882	7.714638839	8.23601128	6.395582132	9.080365111	10.1014445	7.464902065
MB-4851	90.26666667	1	7.617112259	5.69497913	5.8239202	8.209669441	7.243889604	8.997493422	6.163407236	8.722451487	9.439420963	7.514491482
MB-4853	265.9333333	0	9.963947749	5.994501714	6.204716172	8.848757964	6.919474397	8.265000441	6.635412848	9.496429576	9.055969982	7.479003419
MB-4855	41.46666667	1	7.568581328	5.897115402	5.660869334	11.62335573	6.558313202	10.72598049	5.933202176	9.485183861	12.56120284	8.331392091
MB-4858	129.3333333	1	8.24226908	5.695637252	5.803065423	7.754435164	7.464870354	10.57446044	6.314838481	9.341466879	10.856573	8.090458854
MB-4860	234.6	0	8.716163319	5.766475853	6.103069123	8.813914785	7.541027667	8.315978472	6.570033445	9.881115801	9.197090044	8.025502492
MB-4862	187.3	0	7.992935049	5.650912714	6.489791159	7.669535269	7.609250358	8.855040605	6.600549566	9.523815298	8.557858703	7.738196469
MB-4866	224.3	0	8.562656172	6.25349742	6.450732529	8.112530197	7.194868083	8.964772301	6.222340861	9.969903361	10.58559649	7.103482672
MB-4867	221.9	0	8.637394202	6.219930164	6.526045599	7.417396787	7.152546998	8.584494981	6.829639259	9.781339542	10.93403427	8.089967324
MB-4869	29.3	1	7.41385197	5.942729002	6.143909985	8.514984926	6.699224579	8.705633813	6.303776579	9.31917645	9.747404765	7.133063014
MB-4870	229.0666667	0	9.940854181	5.901128312	6.415230913	8.853636976	6.432143767	9.119348961	6.744629709	9.337852167	9.276387121	7.585488013
MB-4872	157.1	0	9.76260695	6.040026273	6.485076547	8.699971761	6.857142442	8.428155339	6.530251383	9.493880027	7.920683539	7.297121629
MB-4873	117.6666667	1	8.31574731	6.121316803	5.875080384	8.248024388	7.174185026	8.698849837	6.19083689	8.846237726	9.226294845	7.543668993
MB-4878	22.46666667	1	10.15692524	8.153346849	6.599712871	8.556815928	7.115481624	8.950779373	6.662295889	9.818877058	11.59127263	7.163269719
MB-4882	266.1	1	8.181807205	6.450025778	6.815007366	7.095661185	6.347640411	8.573732617	7.532555719	9.35945923	9.351526138	7.147883058
MB-4883	268.9	0	8.589374229	6.285395637	7.06655477	8.124179226	6.895064506	8.82897188	6.881535671	10.15670762	9.839610887	7.57379834
MB-4894	232.4	0	9.272135177	5.85950147	6.098144125	8.430214627	7.87243469	8.813567696	6.198056288	8.835311771	10.22131371	7.420842671
MB-4898	117.9	1	7.135266546	5.96800202	5.675065274	7.972479656	7.344133097	8.381137748	5.773871437	8.708445554	10.42819144	7.338711792
MB-4899	275.7333333	0	8.898724702	6.225405091	6.149394444	8.495019843	6.881022281	8.447195072	7.02470943	9.811813393	8.550234306	7.43726411
MB-4900	224.6	0	8.953149524	5.810250874	7.129798804	8.007644844	9.19783304	9.877021916	7.58073542	9.456272866	10.32081176	7.101188421
MB-4906	233.8666667	1	8.140943726	5.905344742	6.178772166	6.689930313	6.775681671	9.49108684	5.656794623	8.154120983	9.980862547	7.825286385
MB-4908	47.9	1	7.650233612	5.409147304	5.977861425	8.191703047	7.512584289	8.653137077	6.440913042	9.300112375	10.79270684	8.379377341
MB-4912	50	1	7.590486886	5.774372517	5.993961724	7.129939049	7.823876741	8.041977801	6.503174656	9.274105048	9.198492521	7.430519881
MB-4925	102.7666667	1	9.154340403	5.980046397	6.373393153	8.889111704	6.791881373	8.98525367	6.847242675	9.200225838	11.29401764	7.436007694
MB-4930	58.43333333	0	6.878880684	5.628031253	6.047058038	7.690572068	8.160144418	9.624040259	6.237639102	7.435267757	11.33679909	8.110755749
MB-4933	272.9	0	7.566964594	6.001954227	6.475829086	7.039340328	7.821956048	9.177286589	7.135802072	8.932639492	7.806039905	7.130713367
MB-4934	70.23333333	0	7.709043906	5.656653306	6.026768686	8.125987897	7.343232812	8.238253068	6.735173601	8.779883579	10.11892241	7.156873534
MB-4937	77.23333333	1	7.992690441	5.907965088	6.548916366	6.693451456	8.778683699	10.62015768	7.309336732	8.938625607	9.646190311	7.484898633
MB-4941	58.63333333	1	9.487120656	7.234370698	6.654238083	8.564309118	6.608135001	9.112266437	6.715467582	9.921128713	10.42200144	6.990918528
MB-4944	237.2666667	1	6.066283784	5.709289255	5.902178316	7.348792356	7.546340568	8.11943313	5.93564461	9.841047272	9.03108954	7.637864275
MB-4949	216.9666667	0	6.795482292	5.897678497	6.723780456	7.875951999	7.109345154	10.22780974	7.345790316	8.993769656	10.64759239	7.103356199
MB-4950	150.6	1	7.848133682	5.875871075	6.158232101	7.789677792	6.530072206	9.688054332	6.20795321	10.35039663	8.755073622	7.195289066
MB-4956	69.3	1	8.273251487	5.698266215	6.067119461	7.660871237	6.840439532	9.698912393	6.152191516	9.101398062	11.24159356	7.931058785
MB-4957	197.6666667	1	6.485806648	5.943187953	5.840560553	6.985646539	7.642552247	9.030815685	5.49774608	8.835350543	8.159564311	7.256972689
MB-4959	117.5666667	1	8.500974633	5.98085528	6.627263625	9.002415432	6.750626724	8.912493037	6.973442381	9.705257656	8.693967212	7.318372838
MB-4961	219.4666667	0	7.865030779	5.967965272	6.234872081	7.489130103	7.300864082	8.748661987	6.022418648	9.243217305	9.827703238	7.742906765
MB-4962	197.8333333	1	7.14784719	5.642010401	5.926202983	8.222715441	7.182783194	8.562684156	5.989986426	8.741728917	9.727764781	7.284781967
MB-4965	263.6	1	8.074471279	5.993303991	6.020517326	7.599882718	7.252530211	8.856030072	6.000983713	9.593677503	11.2886851	7.706633483
MB-4966	49.3	1	7.780206308	6.378844474	6.406651233	8.478275886	7.032404385	8.294858485	7.597454864	9.009100715	9.876117692	7.236486151
MB-4967	130.7	1	9.511604293	6.177540552	6.503736725	9.022647572	6.537993717	8.877252787	6.997898635	9.927648257	9.521919142	7.240741119
MB-4968	78.7	0	8.015782995	7.232454281	6.155870864	8.387026671	7.303272233	8.836773464	7.006765069	10.36738909	8.895974219	7.321201092
MB-4969	198.1	1	6.774477232	5.980859172	5.419229896	7.163389848	7.068084497	8.788909569	5.791719322	8.577976463	9.294876597	7.538390174
MB-4970	88.8	1	7.371960768	5.69029813	5.513668029	6.547300533	7.890193612	8.537391668	6.430612179	9.276403332	9.720733559	7.88710147
MB-4976	224.1	1	7.348607027	6.477192349	6.256870762	8.653760831	6.248259653	8.531825427	6.603477417	8.489410784	11.38191098	6.756719692
MB-4977	216.7333333	1	8.127816408	5.993728497	6.060425686	9.861339515	6.764545465	8.604288961	6.79195865	9.384311035	10.66413429	7.281230664
MB-4981	180.7666667	1	8.246699125	8.357902833	6.521283342	8.915994081	5.83990174	8.802670666	7.791940531	9.681687701	10.26572854	7.025292534
MB-4986	79.8	1	8.999168469	6.860726729	6.568593126	8.21292423	7.339435922	9.413749901	6.749908243	8.379721395	9.506154964	7.284987562
MB-4987	221.7666667	1	11.17538031	5.872329675	6.21693143	10.56087924	6.508122118	8.682606259	7.035148322	10.64428604	10.70945604	8.080403126
MB-4991	126.8666667	0	8.029303798	6.088440911	6.383522771	8.507727434	8.017836361	9.626443206	6.790977798	9.762468467	10.04922887	7.608714948
MB-4992	165.3666667	0	7.791258025	7.5836673	6.238961982	8.006015949	7.087157033	9.714220093	6.356035011	10.3446575	10.98937339	7.333046801
MB-4994	174.1333333	1	7.369485885	6.0053109	5.991337493	7.789155432	7.685408647	8.39270377	6.308805334	9.081382048	9.992690787	7.335156826
MB-4996	99.76666667	1	9.527294322	6.128298529	6.009201263	8.539422265	6.46664161	8.747481439	6.395143179	9.7306	10.4614736	7.346407289
MB-4998	65.56666667	1	8.116150195	6.761299216	5.929568879	10.11888514	7.547632554	8.520813209	6.288010661	8.359231228	10.90559384	7.92832327
MB-4999	187.9333333	0	9.73565871	6.461495101	6.631911909	8.10794285	6.690813911	8.726054491	6.609138326	9.122972774	9.912670027	6.897439217
MB-5001	81.8	1	8.169581516	5.88559046	5.972709278	8.286840777	6.828390846	9.145468231	6.46902649	9.486639359	11.54519403	7.89207011
MB-5011	80.5	1	7.637979473	6.133330196	6.34304379	9.976275649	6.375477258	8.380605496	6.924470385	9.98993209	9.704603935	7.073051875
MB-5013	251.2	1	7.745291776	6.479382154	5.924742645	9.621067905	6.758751621	9.203382254	6.276365195	8.803432582	10.33349819	7.127433369
MB-5014	213.3666667	0	7.086596058	5.631758932	6.511610852	7.466811186	7.970481159	8.581931494	6.324455645	9.018642211	9.362959854	7.270826208
MB-5015	252.3	1	7.465367506	5.365146068	6.018963327	7.231233333	7.050566087	8.955297988	6.007965596	8.888104504	9.971328947	8.109682272
MB-5018	108.6	1	8.012902984	6.792277206	6.165985683	8.633301205	7.628450383	8.327061719	7.515401556	9.334823785	8.698292449	7.264301592
MB-5020	84.83333333	1	7.771826301	6.228412983	6.191988235	7.6424744	6.808954726	8.77629126	6.648249429	9.107426946	10.16292898	7.244243101
MB-5027	189.8666667	0	8.647519285	6.735712466	6.672934649	8.400486353	6.786984854	8.611269236	6.925510237	9.491256739	9.321186653	7.646458358
MB-5033	52.73333333	1	6.74019055	5.670073606	5.646966392	8.826513799	7.070917821	8.747824099	5.695485337	8.838837394	11.36748114	7.597116393
MB-5035	213.2	1	9.18702101	6.034260111	6.34304379	7.648153556	7.498901282	8.78161964	6.764166314	9.577682547	8.48867517	7.524751089
MB-5039	62.13333333	1	6.90668033	5.899740083	6.011817577	9.897776948	7.10701864	9.239310571	6.09081266	7.539905871	10.97709236	8.560731413
MB-5040	79.16666667	1	7.235751702	5.768459937	6.027853058	7.736106674	8.122295601	9.691439205	7.276767761	9.240575468	9.394246399	7.719513734
MB-5043	128.3666667	1	7.379783527	5.768929931	6.051807571	8.266322113	6.723463866	8.70314861	6.487789059	9.608768893	10.86620926	7.001038451
MB-5044	139.4333333	0	7.331423477	5.709956104	5.886640819	6.947715747	7.002119077	8.32687219	6.253924091	8.569154775	10.14517726	7.805853099
MB-5045	168.3	1	7.373859961	5.903053936	5.864581713	10.32239154	7.745072815	10.1449848	6.96020767	8.61433201	9.835022218	7.276306355
MB-5048	86.36666667	1	7.871718542	6.169306488	6.389426081	9.091550293	7.717503566	8.305104284	6.346005737	8.511741363	11.04628813	7.478951421
MB-5049	255.3	0	7.329126514	5.782705207	6.272631109	7.296745028	7.161001663	8.424671938	6.826235339	8.370825095	7.792929147	7.780261783
MB-5050	184.3333333	0	8.281297663	5.91409801	5.992645754	9.287193156	6.569307754	8.918994112	6.693736165	10.03912866	9.695924528	7.542658376
MB-5053	150.6	1	7.365333661	6.429547941	6.340613355	8.678959579	6.780635184	8.716066488	6.56239889	9.279531079	9.7000756	7.670885486
MB-5059	257.6333333	0	8.475685834	6.30103961	6.636805368	7.782289232	6.518108253	8.44659699	6.912338433	10.04131062	9.485102405	7.474058486
MB-5060	150.1	1	7.429956459	5.760256756	6.134613121	7.702909504	7.25813146	8.340673108	6.598108299	10.34931481	8.03358657	6.887365032
MB-5061	39.43333333	0	6.612101588	5.967964204	6.813461055	8.000863775	7.206679499	8.367604169	6.981036129	9.012346617	9.760339777	7.202577398
MB-5062	168.2666667	0	7.091247412	6.005844044	5.994875038	8.492466921	8.133140893	8.939279901	6.950484586	9.795188141	11.56735828	7.898595995
MB-5064	91.5	0	9.645175675	6.455557219	7.35922713	7.325133702	6.647285304	9.165423653	6.513981695	8.883407199	7.616944465	7.748067168
MB-5066	94.7	0	7.967161082	6.206157501	6.24703812	7.855960455	6.550524334	8.852428619	6.732694803	9.434114034	10.63501198	7.687165084
MB-5068	182.5	0	9.499433752	5.994554864	5.806496224	6.759525123	6.303319748	8.792715593	5.900205109	9.208668264	7.525316932	6.97625472
MB-5074	221.6	1	7.398501161	6.003527444	6.088354791	8.470735585	7.430270603	8.667142429	6.24782702	9.357355062	10.13704987	7.885505342
MB-5078	87.1	1	7.166067897	5.856604491	5.643246978	7.428274128	7.678533289	9.866079548	6.954685246	9.114660512	10.24641504	8.623537303
MB-5079	199.9333333	0	9.119662348	6.00557787	5.684594723	9.199190352	6.862122482	8.665823123	6.220708757	9.483899448	10.64759239	7.661665301
MB-5084	198.1	1	9.247448357	7.240307204	6.215128458	9.194391414	6.614341433	9.250732167	6.215424347	9.050622289	8.079255372	7.098012131
MB-5086	84.23333333	1	7.324630202	5.675316211	5.567565976	7.001216942	6.757445199	9.009408464	5.732755205	7.540392045	7.815210511	7.173993803
MB-5088	199.3666667	1	6.944983596	5.922658272	6.456187443	7.528716037	6.960167364	8.324821377	6.386087999	9.279489421	9.520143737	7.142364741
MB-5092	174.5666667	1	10.33220106	6.817675772	6.79767224	9.901092263	6.009213887	8.583896971	6.96945267	9.969329894	9.86477811	7.409454593
MB-5097	61.6	0	7.692036435	6.331153721	6.78319072	7.919037323	7.41828983	8.444915524	7.265742377	9.318521815	10.15385676	7.887430433
MB-5098	186.4	1	8.609260322	6.209682754	6.112901392	8.045019301	7.061884308	9.03103289	6.564310316	9.613810017	9.522032677	7.551295692
MB-5101	34.33333333	1	7.410744602	5.839519713	6.121466417	7.283064159	7.203426326	9.53086474	6.289519669	9.163264302	12.32218819	7.962882999
MB-5105	204.4333333	1	9.304679572	6.112663323	5.969769362	9.408490879	7.212268096	8.892711607	6.275887139	10.03623216	10.31007522	7.718862198
MB-5107	82.63333333	1	6.552316003	5.867357682	5.410456542	7.456958589	7.65245459	9.616174913	6.318105589	9.207695068	9.005373957	7.496144964
MB-5116	71.76666667	1	6.618761568	5.681565436	5.876347449	8.609263939	7.444561984	8.305997138	6.042717696	9.875903526	9.810548132	7.369005756
MB-5117	209.2666667	0	8.159271423	6.082955052	6.178859689	8.608128294	7.347252518	8.974693178	6.216163948	9.598972402	9.424947012	7.976343641
MB-5118	211.7333333	0	8.279275344	6.575327761	6.286794721	8.548688588	7.034561735	8.427779969	7.011402984	9.438809344	10.6223821	7.874488225
MB-5119	59.76666667	0	8.45803716	6.228257059	6.173751772	9.101402294	6.423007887	9.23126772	6.469743497	9.238333188	11.90012452	7.810446923
MB-5121	114.9	1	7.063635809	5.602192389	5.79762447	7.605934663	7.392625251	7.906341296	5.914846995	8.619307774	10.75418638	7.652759375
MB-5122	125.7	1	7.74945798	6.920726599	6.169931122	9.172639839	6.654214471	7.916748592	6.551347951	9.53245947	11.83133169	7.671056967
MB-5123	90.3	1	7.873165293	6.167637887	6.625122729	8.182519832	6.608137628	8.181029782	7.419981981	10.12884664	10.58155911	7.941563454
MB-5124	124.2	1	7.639799874	5.865721049	6.317717247	8.058561046	7.094764653	8.294089279	6.9160106	8.471756381	9.912274956	7.318098834
MB-5127	191.4666667	1	6.963753737	6.181531948	5.693339154	7.481834596	7.132069843	8.477875776	7.055178588	9.650979023	9.519441483	7.32366334
MB-5130	255	1	8.512796951	5.801797217	6.243364202	8.200882078	6.929187044	9.1637851	6.888195544	8.723103566	10.89900986	7.944725718
MB-5134	196.5333333	0	7.99355691	5.863443733	6.670576869	7.517012576	6.001610243	8.388409724	7.013229852	9.334447459	10.35257179	7.229987668
MB-5139	89.96666667	1	7.071574782	6.060908146	6.366566624	7.841086496	7.14348985	7.834580422	7.022488165	9.062317629	10.01923528	7.681072373
MB-5143	127.9333333	1	9.08504924	6.496025358	6.160920657	9.334950483	6.830373496	9.125394573	6.514129139	9.2034516	9.913944087	7.3429033
MB-5144	213.0333333	0	8.222278197	5.933799742	5.937966592	7.51447265	7.876150007	8.620485867	6.002554272	9.212964008	9.977247573	7.369189125
MB-5147	20.26666667	0	7.147046418	5.903684377	6.683097643	7.33923749	6.263993956	9.02962181	7.434550578	9.41166089	11.21869657	7.959208092
MB-5152	115.9333333	1	6.42315414	5.868809052	6.482843826	7.504866524	6.836221933	8.679410133	6.865341949	9.493329581	9.675347561	7.585144249
MB-5160	87.73333333	1	6.790886646	6.083538643	6.048230104	6.868316478	7.503017337	8.144126335	6.707377759	9.160875856	9.331093464	7.917662658
MB-5163	212.2	1	7.058756643	6.057976324	6.825804046	7.760267748	7.109756674	8.454393197	6.773165577	9.812622522	9.85424497	7.020852931
MB-5166	80.73333333	1	7.705162487	5.845529519	6.149878782	6.881268806	8.409016078	9.785759634	6.2188922	9.254555713	9.66473024	7.711900981
MB-5167	208.4	0	6.764797295	5.756546876	6.172299339	7.442612768	7.49631402	7.928254907	6.381574499	9.367578781	9.046461206	7.339580478
MB-5169	51.96666667	1	8.14230818	6.868186983	6.234550312	7.169117666	7.390895963	8.354907617	6.97236187	9.241037109	9.757214561	8.323771834
MB-5179	246.6	1	9.495896511	5.944927124	5.929198788	9.322548514	7.038992056	8.974153525	5.842155712	9.293570135	11.41585024	7.846491992
MB-5182	134.2666667	1	8.225325552	6.123447961	6.268867675	7.966935551	6.841108353	8.829089585	5.998372127	9.477938182	10.72315806	7.500611325
MB-5183	118.5333333	1	8.506983573	8.290235632	6.21002969	8.390017977	6.895466346	8.809978921	6.480519892	9.298079809	9.672410426	7.238386854
MB-5184	89.33333333	1	9.344090435	7.528880205	7.160682767	9.75568975	6.484514285	8.17785897	7.536686716	9.387839696	9.540954956	7.599939527
MB-5185	77.46666667	1	8.020727095	6.43331635	6.876440649	6.635044188	7.325068654	9.482324827	7.058795252	9.937887847	10.91694569	6.890801351
MB-5186	203.2666667	0	8.766414905	6.015810642	6.215872234	8.36423566	6.452088212	9.260303752	6.945420881	9.220960352	10.29066542	7.454525192
MB-5189	111.9666667	1	9.075908956	6.043687407	5.94683011	10.73396537	6.793124483	8.226755371	6.643383995	9.902578726	11.01448743	7.364700259
MB-5191	142.1666667	1	9.256919587	7.621577374	6.760755153	9.048328265	6.887386806	8.552741538	6.351882721	9.096015472	10.04194008	7.364369872
MB-5193	54.26666667	1	6.707410044	6.490191778	6.097305361	8.987699684	7.172211859	8.626572676	6.241306619	8.202140669	8.966367547	7.823925907
MB-5195	196.8666667	1	7.694911646	6.125603301	6.296926653	7.90715725	7.031652104	9.493585488	7.079751275	8.96253848	10.65856582	7.68920435
MB-5196	94.03333333	1	8.304695055	6.21310075	5.99508195	8.043711205	7.385830858	9.263324255	6.224738685	9.506214972	10.76998627	7.853986913
MB-5197	223.8333333	1	7.940339388	6.279411566	6.477745663	9.116061139	6.938667608	8.49742123	6.811872153	9.191971707	10.32918233	6.90937912
MB-5200	52.3	1	7.288205724	5.773549025	5.946736791	7.189125907	8.135758967	8.559802469	6.225233356	8.357613577	10.38852138	7.850931123
MB-5201	96.96666667	1	8.124106828	5.948475445	5.602931739	9.645101786	6.967477328	8.397337238	6.080675873	9.608307773	10.33986305	7.300228576
MB-5204	191.9333333	1	8.394756916	6.334557621	6.06907192	9.559905947	6.711734418	8.741912936	6.011082852	9.20434481	7.819358022	7.967825536
MB-5206	205.7333333	0	8.419646735	5.97431995	6.353142525	7.380428337	6.999080104	8.285492565	6.365389148	9.697238755	10.3864015	7.978298053
MB-5211	247.8333333	1	6.875417055	5.750830384	5.902371334	9.391326502	7.280394427	9.106557424	6.487679506	9.116576443	10.49936891	7.688777472
MB-5212	179.1	1	6.306241917	5.992277152	6.023654882	10.83178876	7.259406905	9.090811455	6.691100045	8.555232301	6.298800152	7.324850528
MB-5215	118.7	1	7.211622677	5.788508092	5.537704471	10.20872052	6.701793294	8.385213589	5.377612887	7.197457752	10.54731948	8.966988532
MB-5218	254.9666667	0	7.175592216	5.853636351	5.947019969	9.009346124	6.831353288	9.373005438	7.525522472	8.612115272	11.45446824	8.567294893
MB-5221	131.3	1	6.997338792	5.809671367	6.384406895	7.225563158	6.908338515	8.798321655	6.446129497	9.825740231	9.564225841	7.343145739
MB-5224	99.4	1	9.019857811	5.784469986	6.265299814	8.367975445	6.978247683	8.709236324	6.579332652	9.447550057	9.48747832	7.592642743
MB-5226	200.6	0	8.358058431	5.607311925	6.488618471	9.700340793	7.219494922	9.139852077	6.768317448	9.421201417	10.67553978	7.271292278
MB-5227	187.0333333	1	8.603796369	5.767509622	6.216869896	8.833165334	7.14915216	9.366959904	6.794831358	10.03730626	10.26698069	7.807953413
MB-5228	180.7333333	1	7.862956625	6.077595021	5.888869265	7.608069862	7.556779491	9.424958557	6.03525778	9.120183979	10.72663423	7.589297356
MB-5230	176.5	0	9.092251608	6.136438857	6.914996051	8.445375291	6.710787066	8.803861572	6.61328496	9.795196082	9.741056316	7.594171449
MB-5233	209.0333333	1	5.873564337	5.761832196	5.691336501	7.590039068	7.874232768	9.239745012	5.414604132	10.191241	11.5276069	7.394550887
MB-5239	192.1333333	0	8.329625317	5.954579923	5.860474281	9.518144927	7.367591713	8.499448121	6.359916555	10.00229584	9.496429576	7.645992233
MB-5240	103.8333333	1	9.379370805	7.4995231	6.322466412	8.793523456	6.218348467	8.517691817	6.229527931	9.50431845	10.50269122	7.192763704
MB-5243	38.43333333	1	7.790125131	5.915120775	6.189995492	9.365072636	7.356657584	8.41556051	6.928546588	8.925841207	9.502015717	7.514957959
MB-5244	216.8666667	1	6.224943947	5.565495268	6.155351241	7.663791355	7.929956804	8.879136488	5.834972418	8.545680959	8.367909683	7.316574945
MB-5251	112.4666667	1	8.67400558	6.049353664	6.319536272	8.498956482	7.023131739	8.93379342	6.531810932	9.823247286	11.12345673	7.197855639
MB-5253	102.0666667	1	8.789942244	7.312571754	6.571940857	9.230711346	7.039751229	8.792733868	6.676051007	9.584580945	11.10030265	7.155072789
MB-5256	108.0666667	1	8.907494197	6.472690411	6.155620528	8.299387472	7.138609107	8.854975325	6.661654312	9.541631576	7.970670549	7.855755323
MB-5260	202.1	1	8.542217949	6.500743229	5.959620154	8.737491954	7.728907663	8.976269801	6.224493224	9.289423765	8.719889155	8.097894197
MB-5261	116.4666667	1	7.373434202	5.986947792	6.076105258	9.031667145	7.69385676	8.826810788	6.590576544	9.129778264	8.192037928	7.735846131
MB-5264	199.3	0	8.753934042	6.732424012	6.531193215	8.325776827	6.538874288	8.645354867	6.919428633	9.289779176	10.39438298	7.463471239
MB-5266	83.63333333	1	6.373903147	5.761961992	6.77843974	6.841242931	7.287285037	9.170235345	6.359964224	8.962376328	9.266045108	7.517777415
MB-5267	71.06666667	1	9.717078971	6.579385089	6.659618036	8.238314	6.812542455	8.628528618	7.183127384	9.849613572	9.71115915	7.678632684
MB-5268	186.1333333	0	9.122644962	6.116132703	6.511394199	9.529510438	6.167887172	8.375673203	6.71690734	9.57530858	10.2508409	7.587894995
MB-5270	187.8333333	1	7.461021398	6.035718639	6.058193277	7.121769909	7.600873744	8.100427558	6.262682304	9.394729795	8.937484678	7.802548449
MB-5271	167.5	0	6.085515979	6.090001159	6.070704072	5.846569834	7.257171724	8.958532298	6.397695917	8.137395522	9.706965011	7.627410635
MB-5273	60.86666667	1	7.201545166	6.040786931	6.789953202	6.909144264	7.605934395	8.669706357	6.741037612	9.280725417	9.411979715	7.411561349
MB-5279	68.76666667	1	7.019785971	5.90246024	5.814598305	6.494263352	7.170464807	8.94322218	6.035356299	9.479572152	10.00431059	7.905265923
MB-5281	79.3	0	9.450974737	5.78127193	6.544553838	9.954430982	6.770374949	10.37956744	6.713510902	9.421385204	10.77447136	7.02187646
MB-5284	65.33333333	1	9.160360704	6.442369728	6.464200556	8.725414884	6.64023595	8.829199817	6.808208711	9.937887847	9.871096749	7.258975597
MB-5287	124	1	8.883546926	6.617438644	5.928251776	8.777708979	7.048842833	8.870667708	6.594282509	9.344232855	10.54684832	7.30110804
MB-5288	128.4	1	6.636447415	5.588276898	6.623311443	6.091577156	7.61077099	8.613464559	6.641291556	9.751136734	9.464974429	7.336842412
MB-5290	36.93333333	1	7.392302826	5.607052837	5.808643562	6.737317834	6.70871566	8.932043847	6.068988518	8.689571171	10.16007252	7.350643828
MB-5291	153.5333333	0	6.56419933	6.310828324	6.069505357	7.019477937	7.226102766	8.2190552	6.511048598	9.326578987	7.971954579	7.441537195
MB-5292	48.43333333	1	7.603180981	5.719220335	6.326735313	9.408359742	6.827166609	10.53856573	6.956641438	8.32467829	11.97073221	7.386419494
MB-5293	208.9666667	1	8.097404941	5.775307962	6.627005931	6.838391111	7.08452764	9.027590617	6.721870311	9.680089315	10.87688539	6.883576278
MB-5300	190.1666667	0	8.33472274	5.941577159	6.46043887	8.891555808	7.201089592	8.165087546	7.108441787	9.942668794	8.51845282	7.619617903
MB-5305	149.4333333	1	7.389838785	5.870592365	5.858131171	7.360239744	7.234365616	9.274929854	6.246056377	8.860155992	7.096233981	7.448229318
MB-5306	159.7333333	0	6.930074031	6.037839808	6.172779392	7.335160046	7.513751944	9.08110455	6.678444817	9.804663855	9.20064965	7.643804203
MB-5310	153.3	1	7.959345773	7.228022806	6.181063297	10.77618699	6.580117018	8.202256714	7.149246471	9.856235033	10.8685538	7.855096545
MB-5317	53.63333333	1	7.582291016	5.968234344	6.453631444	7.648269233	7.037377649	8.418843878	6.397367199	9.336664778	7.818308382	7.315426404
MB-5318	14.16666667	1	10.21354465	6.30335726	6.056712306	10.02359342	7.566459544	10.02524741	7.071980949	9.622174478	11.41585024	7.138713181
MB-5322	102.3	1	8.857218231	5.802661658	5.986426157	8.679003559	7.084473035	8.341314696	5.972098384	9.218819723	11.19868557	7.606657811
MB-5324	190.1	1	9.329678698	6.314338894	6.525590624	8.367509019	6.900011198	8.481730683	7.077055687	9.69822897	9.660243837	7.231818776
MB-5328	14.2	1	6.895941582	6.096686923	6.461207397	8.220224754	6.695163861	8.842102711	6.796975055	8.752342898	9.017182109	7.612792891
MB-5329	45.73333333	1	9.230882464	6.183367121	6.231160244	8.59692051	7.090144941	9.175355542	6.409373198	9.460334582	10.31770708	7.754677561
MB-5330	114.5333333	1	7.66984998	5.920732045	5.999286704	7.533274852	7.064116786	8.848740863	6.241873366	9.848313563	9.75752986	7.213035558
MB-5331	124.1333333	1	9.012815285	5.927894017	6.175814462	8.368132947	7.186395654	8.802485494	6.311012006	10.35305217	10.77792944	7.200282188
MB-5334	85.4	1	7.842689676	6.680132016	6.092912923	7.671719158	6.949374996	9.138250759	6.533335018	8.957720195	9.702629103	7.269058318
MB-5338	51.66666667	1	7.538949649	6.171955794	6.311796437	7.437859245	7.972715042	9.175825324	7.075018533	8.818357133	10.45877712	8.188446603
MB-5341	250.8333333	0	7.212487911	6.560038462	5.902908353	7.100649207	7.162342381	8.374678692	6.129577242	9.792698923	11.22872982	7.594535304
MB-5347	211.9	1	8.470420836	5.967911295	5.993647953	6.843595409	7.000842213	9.408781082	6.234619646	9.52214794	9.666456784	6.929977168
MB-5358	28.83333333	1	8.830101391	6.70010222	6.350663618	8.318039957	6.879514313	8.19277826	6.482244781	9.454045893	10.99615501	7.498523235
MB-5360	161.1333333	1	6.560233054	5.706760087	6.433918704	6.973408237	6.756210644	8.976678648	6.599070079	9.640980573	10.0095804	7.554439402
MB-5361	15.36666667	1	7.197842115	6.162543519	6.060762895	9.604677261	7.349205786	8.707382241	6.923723165	9.26875439	11.63787451	8.247647589
MB-5365	23.03333333	1	8.004464484	6.279461766	6.154197907	8.089710988	6.983021337	8.409459304	6.682124569	9.261318859	10.19942056	7.243404195
MB-5369	39.3	1	6.875415037	5.590819121	6.231265866	6.759120466	6.632999917	8.832446943	6.75134984	9.764175848	10.67973532	7.181569726
MB-5370	119.3	1	6.176505498	5.825577286	6.206992471	6.245110193	7.147455922	7.519881181	6.163728192	8.305964003	8.018322607	7.733560873
MB-5373	2.533333333	0	7.664365391	5.988062484	6.328411976	8.763122875	6.657582705	7.9501267	7.371647922	9.829753344	10.79861549	7.92964443
MB-5377	102	1	7.544450164	5.9350513	6.123207032	7.507849906	6.895666099	8.544326138	6.856587761	9.380167444	9.216395822	7.242714693
MB-5382	116.2333333	1	7.003311262	5.910962086	6.240543695	8.89416759	6.846154418	9.100413323	6.386227463	9.457932508	9.94783215	7.541474675
MB-5383	113.6666667	1	8.06291371	6.2434139	7.093581491	8.253555768	6.758591375	8.689993156	6.937712446	8.798684766	8.083993742	7.150743899
MB-5384	71.16666667	1	9.058322668	6.84437998	6.460680228	8.596311189	7.485959063	8.701384224	6.848412835	8.873040725	9.67724217	8.08660378
MB-5386	192.2	0	9.426378222	5.812776612	6.184959226	9.92678187	6.959390723	9.322460593	6.190651764	9.282865942	10.09882319	7.834708088
MB-5388	146.9333333	1	8.011223323	5.925139281	6.290720997	8.130341865	6.962405301	8.408437378	6.645365197	8.909675499	11.17729239	7.118830661
MB-5389	124.7666667	1	6.271113094	5.584328706	6.471725741	7.283751673	6.511904118	7.895120632	6.368341286	9.554768348	10.4868894	7.768505923
MB-5393	154	1	9.23686971	5.804395431	6.323679564	10.39659223	6.679831279	9.070047808	6.017338589	9.603893853	8.974586771	7.706947798
MB-5395	165.1666667	0	8.475152552	7.639321218	7.011160043	7.918506697	6.970330067	8.858656376	6.924269198	9.20236133	9.891068194	7.066364291
MB-5396	165.6666667	0	9.127565417	5.769925231	6.204378475	8.962918551	7.660080036	8.681066869	6.737542985	9.484253236	11.50583251	7.170832261
MB-5397	172.8666667	1	8.572192188	6.486177651	6.357724962	9.509989746	6.640471806	9.123870352	7.340060033	9.526473753	9.98140167	7.652022524
MB-5398	213	0	8.254529561	6.748110797	6.002905549	9.575944499	6.613289902	8.538424819	6.376263796	9.545765531	8.395808206	7.512897137
MB-5399	106.8	1	7.517484117	5.679778744	6.033319044	8.620253958	6.069384399	8.797928766	6.268358978	9.251646643	8.719961128	7.251561424
MB-5401	70.16666667	0	7.758466771	5.916944311	6.350649153	7.871713923	7.02273212	9.373074275	6.564010715	9.533940881	10.73019283	7.085526829
MB-5402	107.7666667	1	7.698523701	5.882125688	6.205334872	8.386721879	7.108631598	8.695348908	6.344481967	10.0364142	8.834788017	7.763386853
MB-5403	95.73333333	1	6.25995366	6.215609832	6.251605054	7.997157458	6.636702712	8.409049148	6.416932035	8.346996137	9.528084091	7.568774928
MB-5404	74.73333333	1	7.833710828	5.66616656	6.71636834	7.259810697	7.231589241	8.635743306	6.89307841	9.605230314	9.519464666	7.274379864
MB-5406	97.43333333	1	6.682597925	5.708175369	6.27148568	7.279604334	7.180994332	9.979291168	6.708710224	9.134525334	9.762242654	7.425249449
MB-5407	205.6	0	9.182798537	6.975119659	6.751203357	7.940279483	6.904596624	8.413394291	6.790776592	9.113783048	9.868027964	7.694160951
MB-5410	202.7666667	0	7.807526973	6.130825458	5.567565976	6.954940478	6.949442407	9.277924103	5.770866754	9.261135772	10.37021909	7.282545043
MB-5412	220.2333333	0	8.593496484	6.475492264	7.161889498	7.93579804	6.481020249	8.472464214	7.097165243	9.28870472	9.984261047	7.083472916
MB-5414	140.6	1	8.100627647	6.860169561	5.843783314	8.206611994	7.684402848	9.116637271	6.819872232	8.346100619	11.81593204	7.960250552
MB-5418	207.1666667	0	7.630285297	5.934001743	5.975081185	8.758879649	7.203043335	8.762081825	6.695360899	9.420030428	10.58538175	7.566722096
MB-5422	46.06666667	1	8.228473539	6.621336179	6.340289478	8.614804384	7.386970308	8.488308113	6.644667325	10.16019572	9.018651783	7.344184808
MB-5424	83.53333333	1	8.350822222	6.151131794	6.625904023	9.166461571	7.161858553	8.677537238	7.088980587	9.666868797	11.22131285	7.846747197
MB-5425	49.46666667	1	8.222381301	6.198960833	6.426883315	9.013762297	6.930098914	8.769709041	6.340506992	9.135515203	9.058717086	7.686117048
MB-5428	150.4666667	0	9.082551472	7.034293611	6.757800081	7.55350223	6.603206621	8.573805015	6.780183408	9.176659745	9.242295348	7.277065709
MB-5429	30.7	1	8.615410969	5.889594273	6.42898065	7.999174057	6.723843067	8.921547011	6.949663948	9.543345171	8.15435245	7.700576719
MB-5432	98.5	1	7.501888572	6.392990774	6.105986642	7.280076148	7.409499908	8.859670095	6.733501799	8.610988334	9.220150761	7.817095002
MB-5433	176.3666667	1	7.421809084	5.756548399	6.004497588	8.868539917	6.85181785	8.130917109	6.113920466	8.160357986	11.28207665	7.215131016
MB-5434	45.16666667	1	7.179603244	6.060497278	6.059198318	8.90702794	6.851382962	10.21206873	6.557866002	9.601377601	11.48047936	7.271593623
MB-5435	104	1	7.472686758	5.755624453	5.81533866	8.342377686	7.134890019	8.976266117	6.599988354	9.608338027	9.300307263	7.371585849
MB-5444	240.4333333	0	8.347529992	6.692593878	7.099822806	7.107327259	6.463781546	8.509068559	7.397265583	9.340102817	7.294813907	7.642704507
MB-5447	148.8666667	1	8.204444624	5.894056608	6.402368606	7.588018116	7.058165424	9.002410925	7.393448851	9.005537002	10.46715737	7.413713626
MB-5451	189.9	0	8.519835628	6.242646181	6.494930239	8.497319186	7.025887022	8.41120149	6.531993848	9.169199316	8.638817403	7.45775822
MB-5452	16.16666667	1	8.179471694	6.275610354	5.783438989	8.357188366	6.633845249	9.006196997	6.068949156	9.240143877	10.51278739	8.069486118
MB-5454	50.66666667	1	8.597278816	5.890769649	6.604457811	8.427433319	8.279910086	9.415835691	6.908645387	9.427594569	10.76048879	7.470225232
MB-5455	61.8	1	8.587384825	6.275612885	6.830679513	8.306160054	7.282192972	9.756143605	6.445715467	9.749816487	11.65673554	7.058146945
MB-5457	164.5666667	1	8.259737489	5.926208778	6.492389141	8.595844353	6.529653706	8.141380373	7.66492804	9.067522377	10.00546957	7.667763173
MB-5459	90.8	1	7.476820342	5.874392048	9.626605953	8.039544393	7.767489692	9.733784156	6.307595631	9.457701517	11.17265435	7.623483194
MB-5463	58.13333333	1	6.917227111	6.602129416	6.737636627	8.685335506	7.221768325	9.289947556	6.128929709	8.941963267	10.78710311	7.231530831
MB-5464	116.5333333	1	9.20745274	6.157696636	6.098908782	7.567109794	7.007603438	9.102442634	5.970839025	8.969407007	7.166198733	8.316619821
MB-5471	185.7666667	0	8.210389097	6.781526851	6.602511627	8.656084388	6.902553733	8.961340916	7.717812903	9.50023023	10.51278739	8.092074591
MB-5472	19.56666667	1	6.613008794	6.218848161	6.034339461	9.447005951	7.679935609	8.364364944	6.752477657	9.063266159	9.745040893	7.926963513
MB-5473	125.9	1	7.914427528	5.800102955	6.024277877	8.756084665	7.305438001	8.646465669	7.070352948	9.317255141	10.95734681	7.412919035
MB-5475	2.533333333	1	6.652522186	5.648813564	6.241008108	7.146420158	6.867694609	7.999086281	6.548384948	9.267348074	7.33036165	8.128831545
MB-5477	110.4666667	0	6.728038884	6.249506906	5.924605692	6.668243847	7.618463989	8.290988607	6.507236792	9.967734217	7.996939754	8.007891648
MB-5478	34.3	1	7.723416446	6.128217591	6.797064892	9.119118616	6.869476414	7.668985461	7.868626114	8.894289003	11.05543456	7.266394003
MB-5481	46.36666667	1	9.881208462	6.007931454	6.718707473	7.097759773	6.796890344	8.917793611	7.326359378	8.831593804	7.969794499	7.589478932
MB-5484	238.5	0	7.888308631	6.110085903	6.339492526	7.491027538	7.34844093	8.848610984	6.861669684	9.0608145	9.915705558	7.106957224
MB-5485	31.8	1	7.087501003	6.71139123	5.752381682	6.763824867	8.141752557	9.136277276	6.358937451	9.14431073	8.988420164	7.879062058
MB-5486	123.3	1	7.649242609	5.865350929	5.909982112	7.517298178	7.738813964	8.021373078	6.755396842	9.434565734	9.757012604	8.156319899
MB-5489	216.9666667	0	8.269923734	6.147500594	6.573043919	9.354726801	6.821435122	8.698854547	7.284843407	9.884189283	9.18416009	7.521858363
MB-5490	51.2	1	8.177702877	6.091851082	6.276283708	8.159060996	6.697363409	8.142418808	6.791881596	9.742214241	10.856573	7.340527303
MB-5491	65.83333333	1	7.401636074	5.719207287	5.690552723	7.365678448	7.523545429	8.802073516	6.045006969	8.645220921	8.964753703	7.750996603
MB-5492	23.36666667	1	10.11087489	6.614722979	7.470440616	9.967590094	6.764458868	8.006674992	7.044482017	9.874403887	11.47310062	8.119870678
MB-5493	57.23333333	1	6.820240705	6.142638766	5.804927769	7.206814208	7.561055215	9.112193471	6.210382256	8.150059106	10.33048236	7.996607959
MB-5495	228.8	0	8.710201759	7.221610223	6.727491605	8.5576222	7.329152644	8.44738225	7.142542387	9.548735327	9.019982785	7.99812417
MB-5497	237.5	0	8.23603279	5.8887332	6.27767016	8.902241048	7.422493825	9.940248365	6.733714926	9.8913096	11.48552756	8.272552791
MB-5499	123.7333333	0	8.407461774	5.903340918	6.184889547	8.740862974	6.609340864	7.923381421	6.864028839	9.750460302	10.08870688	7.194475708
MB-5502	189.7333333	0	7.408654442	5.651275124	5.874242334	7.755970152	7.141940618	9.744928394	6.462260258	9.420963376	10.08931137	7.661611137
MB-5505	164.6	1	7.243796149	5.7197213	6.168867123	8.681725124	7.160408098	9.104397273	6.026177443	8.992595802	10.40538979	7.562501494
MB-5510	103.1	1	7.497871822	5.885695997	6.127092458	8.041858015	7.335120876	8.977607421	6.853038981	8.979046593	9.622028041	7.559381105
MB-5514	182.9	0	10.05811501	5.892765008	6.075938309	7.9043289	6.372887492	8.159259416	6.29415507	8.791587698	7.774110833	7.31877971
MB-5518	30.86666667	1	7.779275774	5.891848661	6.248404296	8.347382827	9.122631657	11.20211249	6.747136882	8.311831609	10.54299057	8.205501136
MB-5519	169.2333333	1	8.17191406	5.758514982	6.460199756	7.962000433	7.941352995	9.140173909	6.762638842	9.424762187	10.65210923	7.580062789
MB-5520	16.3	1	8.28311468	5.796691009	6.267519632	7.508294667	7.060769166	9.751523063	7.797297739	8.669340348	10.1445475	7.856500554
MB-5521	124.8	0	6.797294412	5.954529279	6.533772827	7.498771727	7.814403456	9.369749695	7.762059121	9.180319241	8.907333735	8.051330411
MB-5525	2	0	6.741881381	6.007080233	5.622494651	7.678432073	7.148062522	8.793679131	7.104239182	10.44094002	10.27066423	7.66380232
MB-5532	79.86666667	1	7.645749221	6.03503289	6.07026318	8.66755054	7.390397464	8.988714712	6.693487625	9.028909212	10.34169733	7.587445512
MB-5540	48.43333333	1	7.162001532	5.901802107	6.179019599	7.037551684	7.816509413	8.600692203	7.213089699	8.917595631	11.314309	8.206195438
MB-5541	200.1333333	0	9.902117485	7.937789603	7.088538696	8.961218673	6.210078543	8.230041142	7.644422796	9.468589828	10.55378028	7.346856592
MB-5543	34.43333333	1	9.244408341	6.020979637	6.38074009	8.3648883	6.595673435	9.313441896	7.156791343	9.565258324	11.31180683	8.102311729
MB-5550	171.3	1	6.857141138	6.115493535	5.87504026	8.528002556	7.611838711	8.524607356	6.241201253	8.388068263	7.664157747	8.040359734
MB-5552	34.7	1	9.114767965	6.004527047	6.729960127	8.706819335	8.739720399	10.34088801	7.408939269	9.149294899	10.95115111	7.8337227
MB-5553	154.5	1	9.54158038	5.978234903	6.020593429	8.570711894	6.887601651	8.003523247	7.080719401	9.68080561	9.304679572	7.831798955
MB-5554	229.8333333	0	8.327191059	6.918534863	6.302168454	8.547993263	7.904206898	8.220596982	6.944192479	9.442349446	10.60693801	7.476685345
MB-5556	225.4	0	6.768775656	5.601346116	5.643290355	10.09464192	6.888422861	8.258051582	6.430122792	8.668471607	9.434803861	8.069932559
MB-5562	102.9666667	1	7.464880572	5.774911336	6.027655002	9.104622945	7.723226733	7.895602391	6.964827273	9.135969944	9.581657091	7.725085638
MB-5563	117.6666667	1	8.158379571	6.862366038	6.156641825	9.027774772	7.547309454	8.550773169	6.989809103	8.903630521	10.56715012	7.676261307
MB-5567	178.5666667	1	7.72754151	6.248404126	6.040879274	8.114161061	6.89437783	8.696644308	6.502309165	8.638195054	9.87116999	7.676415067
MB-5571	153.8666667	1	7.435252166	6.009063882	6.05874405	8.45332538	6.840123795	8.436360566	6.586754243	8.600704936	9.300844264	7.505114678
MB-5575	117.6666667	1	7.065601049	6.01353333	6.15805618	6.341502381	6.875681338	9.185135493	7.104942388	8.794472344	11.35088862	7.515822765
MB-5576	194	0	8.10351131	5.896496739	6.365172923	7.367994602	7.231844216	9.097756639	7.549120112	8.512047262	10.19942056	7.915850666
MB-5579	90.6	1	8.753100678	6.758454482	6.57432398	7.942332346	6.33329035	9.251292493	7.303756157	9.416554442	11.47171563	8.249201721
MB-5580	71.63333333	1	9.809906878	6.035686986	6.647468665	9.852353847	6.438410424	8.208524772	7.073477826	9.456474129	9.57736415	7.487487917
MB-5582	222.3333333	0	8.657427573	7.005660277	6.568229435	8.403323761	6.322359403	8.527203896	6.787285151	9.548346463	9.319005344	7.138359301
MB-5583	111.3666667	0	9.276854291	6.144046372	6.494279777	9.494058901	6.793479943	8.811639873	6.888768811	9.664504133	9.991295989	7.58122411
MB-5589	185.1333333	0	7.937442219	5.924897272	6.551258553	7.769137666	6.566956566	8.350763494	6.734873454	9.262774513	10.42115998	7.043622434
MB-5590	17.83333333	0	6.1314288	5.758044043	6.295255948	6.958931342	6.769485987	9.484901267	6.909952316	9.241581997	11.31281732	7.716202266
MB-5591	155.3666667	1	8.220572529	5.988201711	6.273997717	8.362713386	6.453796687	8.64854984	7.112038038	9.64567398	10.20139837	7.627649898
MB-5592	26.33333333	1	7.749987635	6.011379601	5.803990278	8.001786068	7.141406825	8.446643288	6.506310234	9.062555033	10.0806781	7.417446359
MB-5596	167.9333333	1	8.309886609	7.664067361	6.951374874	7.669078246	6.443874716	8.196485205	7.118814231	9.341727732	10.28551904	7.409050019
MB-5597	32.73333333	1	7.947933199	5.777385257	6.049407672	7.950259331	6.548992705	8.734819974	6.877145997	9.548690762	7.80004093	7.588873356
MB-5599	224.8666667	0	9.218618875	6.926736452	6.620766232	9.065255936	6.733491686	9.811512278	6.950133091	9.2448729	10.60097011	8.103247351
MB-5601	214.8	1	9.108581663	6.302000469	6.60702252	6.586357201	7.014185131	8.771401754	7.400258238	9.615183163	10.17682815	7.659087672
MB-5603	171.6333333	1	8.988251146	5.938354413	6.909200702	8.439824416	6.512767012	9.024846109	7.376129886	9.691448923	10.74095277	7.407007602
MB-5604	145.6333333	0	6.681054525	5.902406314	5.989894581	7.033110671	7.200747589	9.764940752	6.388382471	9.003699782	10.59131402	7.523048646
MB-5605	123.7	0	6.35174311	5.853149865	6.414285964	6.433544849	7.508257661	8.686287304	7.162056806	9.119662348	9.50023023	8.069674418
MB-5613	212.3666667	1	9.060906249	6.271622699	6.35714015	8.397444453	7.541723298	9.328121688	7.148189995	8.805869918	9.694602808	7.500875621
MB-5614	116.4333333	1	9.298073819	6.709428787	6.840829564	8.846237726	6.520411372	8.923539886	7.304630325	9.292706553	11.16514234	7.279886503
MB-5617	128.2	1	9.2303856	5.763103821	5.759804049	6.940782538	6.544119059	8.670758372	6.099296578	9.114310498	7.055494642	7.522985844
MB-5620	42.06666667	1	7.590432117	6.715197902	6.2515149	9.66788337	6.635163803	7.881757151	6.604107168	8.976642102	10.20391386	7.734540446
MB-5622	182.9333333	0	7.506812842	6.003931063	6.016492098	7.726435673	7.092379381	9.121654026	6.755529938	8.794251654	10.03386505	7.536633038
MB-5623	137.8	1	6.934959328	6.073771497	6.23259784	6.705877614	7.418096638	8.895600921	6.612418352	9.72347621	8.196684372	7.752497081
MB-5626	82.96666667	0	8.126566587	6.275850276	6.379134416	8.390319709	6.992179362	8.632250838	6.970993913	8.968652184	10.1508927	6.950462445
MB-5628	42.6	1	6.176236918	6.074970415	6.070704072	6.723069745	6.906857244	8.985875026	7.149736597	7.925329124	10.85733596	7.978014902
MB-5629	103.8	1	7.441827067	5.938479563	6.331777434	8.470078678	7.186004685	8.836663834	7.007427227	9.30171828	9.670629195	7.537923602
MB-5632	38.16666667	1	7.810682473	5.823812602	6.236429456	8.047863767	7.400798303	9.32607048	7.171883897	8.963227627	10.8685538	7.419884523
MB-5635	21.06666667	1	7.860181812	6.147208003	5.990029649	7.357935481	6.432329694	9.662317741	7.055868557	8.798378807	10.56178966	6.948040958
MB-5636	108.3	1	7.167025184	5.875804182	5.997178827	7.493843568	7.669308265	10.01499166	6.478505554	9.184816468	11.50344301	6.893676948
MB-5638	195.7	1	7.319180125	6.168862102	6.501543902	7.682275753	7.50729004	8.960619733	6.939311933	8.853457766	7.647632084	7.007764012
MB-5641	181.8666667	0	7.536660808	5.649650513	6.176236918	8.531750969	7.19475568	10.14697657	6.397479927	9.550833718	11.08403382	7.798445509
MB-5642	156.8	1	7.118356748	5.936178937	6.262289096	6.339742122	7.046666043	8.778837119	6.348743564	9.617588673	11.15448365	7.096993051
MB-5645	22.23333333	1	6.750469828	5.894025141	6.327254664	6.816620011	6.794133239	8.20687729	6.877358419	9.48711956	8.521331754	7.284320022
MB-5646	167.1	1	6.865875872	5.686869711	6.070051426	7.977193945	7.15788982	9.382917439	6.42049703	9.496515506	12.05552519	7.393426367
MB-5647	30.8	1	7.155681266	5.635782175	5.976599747	7.025825054	6.85919448	9.357996666	6.51183898	8.427166738	10.46667397	7.998228331
MB-5653	194.6	0	7.956213601	6.046639984	6.714822689	7.207910873	6.540552134	9.011320053	7.029125761	9.771557241	10.79919087	7.120186531
MB-5654	173.0333333	1	6.566007551	5.596988574	6.013396041	6.115454465	6.883823317	8.419579617	6.41998827	9.113224735	9.246160892	7.581107479
MB-6001	135.3	1	7.937045684	7.253330792	6.127631052	9.055021451	7.063452529	9.014029974	6.880715618	9.140438578	9.90967929	7.508900767
MB-6006	63.56666667	1	8.719961128	5.840894278	6.192398702	8.453366585	6.675336466	8.133448228	6.891541612	9.714250162	8.600433062	7.255537271
MB-6008	69.1	1	7.474525466	5.440967036	5.841925824	6.939562142	7.864215716	8.610393105	6.100463897	9.009178063	8.060777933	6.870924677
MB-6010	218.2333333	0	7.132557332	5.993352821	6.392132158	7.480481997	7.304901213	9.085696876	7.720859119	9.861437181	9.232774567	7.530336576
MB-6011	211.1333333	1	6.560866513	6.094398705	5.500858875	7.019667354	7.684762445	8.270668098	5.995607708	9.279638369	9.563948388	7.164525233
MB-6012	144.4333333	1	6.170465523	5.53896137	6.065769124	8.596734081	7.234239414	9.569479323	5.569475579	9.290527406	10.7609233	6.406206246
MB-6016	143.5333333	1	9.072978523	6.564651421	6.23384194	7.850540293	6.790820713	8.934609395	6.314998184	9.782272859	8.0167114	6.803084378
MB-6017	70.9	1	7.536660808	5.872087883	6.623707598	9.706965011	6.33418022	8.731889598	6.405971764	9.383869636	7.858793488	7.389616512
MB-6018	143.1666667	1	9.46129365	5.92647995	6.163929451	8.761573539	6.887231688	8.865070559	7.199663322	9.597301922	9.621948686	7.395312709
MB-6021	301.2333333	0	8.710668726	6.048729034	7.025792201	8.828744346	6.411881711	8.326111639	6.733541492	9.053110222	10.44192065	6.795812829
MB-6022	52.06666667	1	8.238172233	5.826130418	5.767520602	7.956439321	7.306490469	9.074119703	5.882900674	8.664306956	10.99476344	7.235803736
MB-6024	252.2666667	1	9.550833718	6.183850984	6.850387269	9.001051172	6.877963856	8.93976757	6.768478955	9.921650289	9.786938168	7.198766606
MB-6026	49.73333333	1	7.815210511	5.557635368	6.07950352	8.268981831	7.308741612	10.52284777	6.48807775	9.675072392	11.14404619	7.246357152
MB-6029	278.3666667	1	7.946165729	6.602952208	6.169404397	7.168683198	6.72111566	8.897143979	6.913241765	9.476377675	10.18644478	6.881151666
MB-6030	145.3666667	1	9.20434481	6.831186459	6.368770077	8.155988117	7.393793953	9.082673613	7.183537355	9.759308347	10.58921675	7.089344259
MB-6050	192.2	0	7.675626039	6.11886101	6.726316635	8.032784313	6.822012874	8.804688723	6.735043623	9.342358229	9.039000486	7.20577459
MB-6051	186.8333333	1	11.0984257	5.989117176	6.721277002	9.751724953	6.629246416	8.553450127	7.376211322	10.16510265	10.12101337	7.130483704
MB-6053	250.8	0	8.023323527	6.185535726	6.675528676	10.23047638	7.150811784	8.596890884	6.332923617	9.443070976	11.3883912	7.843206635
MB-6060	38.03333333	1	7.613074924	6.107239571	5.955655595	7.324189646	8.017209073	9.122806092	7.595440705	9.732011342	8.946296265	8.037913241
MB-6065	188.5333333	1	8.577877032	6.062583789	6.002701563	10.09078719	6.702860068	8.906195357	6.193932202	9.145344091	9.376905038	7.151823375
MB-6069	258.1333333	1	7.520741014	6.35876943	6.51997584	7.3472697	6.516367871	8.768320484	6.93348755	9.176659745	9.831362477	7.103251318
MB-6071	57.4	1	8.015598243	5.887116242	6.514629073	7.592850209	7.077773525	9.498420267	7.266687621	9.225241437	10.20164328	7.35232967
MB-6075	182.3333333	1	7.255700255	5.988877253	6.2515149	8.181807205	8.163388786	8.725459104	5.718387795	9.813700812	10.03049903	6.914045499
MB-6079	239.1666667	1	8.362949534	6.503690872	5.748362093	8.241262109	7.019494329	8.607929229	6.660032546	9.615132233	9.527294322	7.287397195
MB-6080	54.1	1	6.917606623	6.05121431	6.851895488	7.566647023	7.881772329	8.644138769	7.751124264	8.547957301	10.64759239	6.851774038
MB-6083	164.0333333	1	8.0167114	6.732981749	6.170465523	8.102825583	6.865900729	8.679523175	6.309105023	9.330019926	10.12313607	7.056890137
MB-6097	159.7	1	7.022908987	5.75496742	6.083593787	8.227758372	7.426971264	9.145013348	5.629749581	8.521889076	8.417846676	6.548696929
MB-6108	193.9666667	0	9.135515203	6.085527334	6.70645319	8.635141519	6.860646638	9.257640935	7.442904612	9.765207302	9.57728954	7.132621274
MB-6118	264.6	0	8.72994463	5.921737033	6.512643284	8.702133132	6.355036081	9.326287811	6.959509135	9.791677574	10.08673784	6.813806488
MB-6124	115.6333333	1	7.753446754	6.170755838	5.870692669	11.33617166	6.757483635	8.522806745	6.37533504	10.8820257	10.56396516	7.397457716
MB-6133	61.8	1	8.580730354	7.979298274	6.339761684	8.392142723	7.749604431	8.357464497	6.729550275	9.271952775	10.24384187	7.1628595
MB-6135	78.6	1	8.0653723	5.950376655	5.933089116	8.106862505	7.662247413	9.153908121	7.091725344	9.762242654	10.42274373	7.546879265
MB-6138	25.63333333	1	9.071053926	5.8110743	6.425934625	9.232774567	6.751701277	8.320859609	7.590621685	10.01521102	8.470886578	7.038035059
MB-6141	78.86666667	1	8.883161341	5.861965519	5.860141615	9.273088963	7.744017367	8.200869947	6.067378407	9.562581636	11.0984257	7.136129476
MB-6145	34.33333333	1	7.354856945	6.814475051	5.904526334	7.940836676	7.743912333	9.266618313	6.473790659	8.643327581	11.18637528	6.909782946
MB-6149	74.93333333	1	9.246479116	6.336655947	5.562138351	8.818048062	7.11304547	9.341269989	5.897512987	9.184816468	10.45573456	6.689513627
MB-6150	77.66666667	1	8.434701464	8.36417873	6.284653164	9.273088963	6.903097177	9.404676949	7.428978434	9.848071904	10.65439507	7.574344638
MB-6154	195.3	0	7.933876402	5.945731036	5.76789258	9.162533956	7.770251108	8.398915798	6.2785917	8.354015801	10.66792052	7.324845495
MB-6163	88.66666667	1	7.531068974	6.056913637	6.179152087	7.978673885	7.433004384	8.761731275	6.55985186	9.386073922	10.62794534	7.194474723
MB-6164	205.9	0	8.069827792	5.70791894	6.290403452	8.473674801	7.78125084	8.622371511	7.220517802	9.586548263	9.762242654	7.596173688
MB-6167	122.8	1	8.39146412	6.203408658	6.727767795	9.575953078	7.002807134	7.935377049	6.741655675	9.785402745	10.92022786	7.636180151
MB-6168	225.7	1	8.493499191	7.565957527	6.80184653	8.656853243	6.643348652	8.855237845	7.336526429	9.67073298	9.77913999	7.26306866
MB-6171	220.3	0	8.379065814	5.712869893	6.047147063	8.653012305	6.755526753	9.194820792	6.413666187	9.818464983	9.088320942	7.605925535
MB-6179	58.46666667	1	8.604885548	5.853079757	5.727804522	9.297022759	6.848567882	8.93713853	6.621206579	9.498942742	10.75331333	7.046520783
MB-6181	54.93333333	1	6.605623421	5.673939349	5.507453521	6.202579907	7.115745654	9.567224814	5.688138741	8.072076992	7.593329565	7.478872645
MB-6183	79.13333333	1	6.932910725	7.334796565	6.042401985	7.132138692	7.201404767	9.159251644	6.011358752	9.626060118	9.409693178	7.623748161
MB-6185	197.7333333	1	9.351526138	6.094941945	6.569943391	9.69684626	6.713907629	8.471733657	6.669472142	9.790085376	11.05977372	7.533654282
MB-6189	240.2	0	7.076366962	5.992055755	5.912161928	10.11695527	7.705824151	8.626060441	6.586680513	8.837812302	8.409261839	7.512669865
MB-6190	24.63333333	1	7.816240844	5.919724832	6.089554889	7.192306552	6.693368975	8.546246608	7.078460093	9.181767536	9.327830183	7.268379791
MB-6192	42.63333333	1	8.174221391	6.059218714	5.7377013	7.761471523	7.455947217	8.629434328	7.65032216	8.756787008	9.3919056	7.988103563
MB-6195	202.2333333	0	9.137489172	7.76317437	6.947003171	9.727652481	6.893868457	7.91546249	7.497648476	9.57728954	9.972936878	7.483673791
MB-6200	30.06666667	1	8.775296295	6.256488801	5.642035174	8.470224475	7.820249143	9.262427069	6.964181622	9.913083989	10.84939814	7.544827477
MB-6201	222.7	1	7.663419357	5.965970628	6.105809934	7.932262725	6.936311836	8.61355904	6.670325906	9.704104178	10.70945604	7.718810995
MB-6207	118.3	1	8.080483019	6.874643169	6.412721124	7.895470885	6.933318553	8.633210582	6.748388544	9.932062225	11.58447511	7.490757212
MB-6211	42.3	1	7.809588248	6.217554596	6.264702017	8.849585961	7.142618433	9.211661849	6.575066677	9.362967141	10.14596671	7.4530886
MB-6212	224.2333333	0	8.564235932	8.187754175	6.646465561	8.569991171	6.625807213	8.66953132	6.876243112	9.616473121	10.7023975	7.419014728
MB-6214	174.5	1	8.332767938	6.578464364	6.316896916	8.502374985	6.524668528	8.826456428	6.633737524	9.958467891	10.25517511	7.384904246
MB-6217	211.5333333	1	7.958096929	6.172409072	5.505692978	7.490105023	7.703072935	8.870217171	5.964094816	7.974326568	11.17538031	7.818879716
MB-6218	147.7666667	1	8.181807205	6.029626415	6.062905682	8.015040424	6.588241973	9.703381057	6.715580828	9.017441445	10.00229584	7.474286351
MB-6225	117.8666667	0	8.202644693	6.671316702	6.540354921	8.332105513	6.682944716	8.600811443	6.690901857	8.856144205	10.26211319	7.700776667
MB-6232	85	1	8.223598726	6.39831332	6.015980472	7.892319227	6.602235711	8.466151806	6.833564682	8.963981416	9.68226968	7.568738714
MB-6233	201.1666667	0	8.88739025	6.342080177	6.383222253	9.665017994	6.934478536	8.588375634	6.736079627	9.524641695	8.8394395	7.677067118
MB-6238	172.9666667	1	8.042216515	7.988562349	6.228099526	8.175970165	7.015637654	8.79622075	6.682428983	9.491394883	8.898382901	7.353379367
MB-6253	194.3666667	0	8.16661349	6.230801646	6.199354622	8.188344712	6.581327924	7.939356002	6.727132188	9.67073298	9.833055489	7.64426689
MB-6254	60.9	1	9.593148489	5.649664943	5.688958867	9.306837319	6.937661793	8.114374348	5.95936943	9.578638025	9.701156445	7.707653094
MB-6256	127.8333333	1	9.593148489	5.997884944	6.476823016	7.670217031	6.229160868	8.702466171	6.600505829	9.447896591	8.050040578	7.729053645
MB-6257	91	0	6.92071605	5.861578657	6.279206792	8.342377686	7.22168825	8.610403931	6.595141869	9.54158038	9.244408341	7.814572316
MB-6263	75.86666667	0	9.726206725	6.839775568	6.261914831	9.853022727	6.478854823	8.732162247	7.294077208	10.41485481	11.65499135	7.800504645
MB-6271	157.7333333	0	7.269551696	7.421795308	5.663464487	8.490774514	7.208134238	7.598999136	5.940957573	8.748108386	10.24384187	7.475065322
MB-6273	189.4333333	0	8.219365355	6.216733122	6.900150312	7.771038433	6.428658343	8.98392043	6.212709336	8.98115994	9.409693178	6.872721128
MB-6281	3.5	1	6.246759534	5.566967248	6.087189389	10.14803205	6.072355196	9.478290093	6.259248509	7.803431177	11.98632586	7.692323479
MB-6283	92.4	1	9.426378222	7.779559042	6.121605285	9.537608851	7.129785216	7.655673382	6.983489662	9.738092324	9.332258866	7.477765422
MB-6284	88.33333333	1	8.052868145	5.873299851	6.369690778	7.122697244	6.646822011	8.762690337	6.514143353	9.641295065	11.15483157	7.795279333
MB-6286	49.53333333	1	9.065314107	6.185496604	6.03264956	9.58258284	6.502644227	8.23987334	6.319560348	9.304679572	9.341257377	7.394831216
MB-6287	35.2	1	7.91300519	5.964379969	6.205538773	7.069023792	6.841966155	8.919080284	6.465309464	8.717658278	9.01837398	7.764669876
MB-6288	100.3	1	7.636600725	7.430038208	6.352941299	7.277812697	6.997466622	8.330519386	6.378579422	8.392142723	8.517740184	7.593209956
MB-6297	170.8666667	0	8.405950265	5.791980113	6.120598565	7.86964067	7.183813962	8.436718078	6.493996932	9.523348923	9.330019926	7.751656274
MB-6300	63.83333333	1	7.888089313	6.311140889	6.549076216	8.174221391	6.411112616	8.81004584	6.885055508	9.404974059	8.033340756	7.837038845
MB-6302	125.8666667	1	8.004575505	6.318601517	6.047823645	8.140877579	6.945897831	8.881247003	6.532831381	9.128519266	10.66468066	7.823418353
MB-6306	64.6	1	8.639553747	6.195865782	5.965711604	8.077677099	7.13042622	9.09107949	6.752270541	9.162533956	9.119662348	7.426275478
MB-6308	151.9333333	1	8.139710053	5.943309082	6.448853562	8.386211759	6.988419618	8.692139755	6.173056074	9.215702913	9.928550856	7.18628081
MB-6312	162.7666667	0	7.826109755	5.834058824	6.058493579	10.10886483	7.193698285	8.830789892	6.673525563	9.129551752	10.94655569	7.637304632
MB-6317	29.23333333	1	7.29180685	6.597314147	5.892996966	8.398653147	7.499962206	8.226585795	7.047612383	9.330019926	10.73835412	8.067551543
MB-6322	80.36666667	1	7.819358022	6.173203369	6.693404522	8.419180871	6.849187497	9.394059028	7.561808419	9.434672017	11.20280706	7.802749685
MB-6327	18.26666667	1	6.873848433	6.286660474	5.988536964	6.425307214	7.243304516	8.327781537	6.140596438	9.757858112	9.223063801	7.457175893
MB-6328	126.6666667	0	8.569991171	5.956427228	5.976493097	8.73624643	7.395143197	9.009324709	6.239843044	10.00410465	9.679406297	7.789164464
MB-6329	81.5	1	6.584548984	6.186008321	5.978160452	6.783438396	7.659697127	9.324347054	6.983458194	8.559933838	11.8907851	7.305758088
MB-6344	152.9333333	1	7.738420164	5.703173876	6.289808421	7.493367962	7.249292843	9.288617116	6.526061048	8.926092322	10.06707501	7.56647186
MB-6346	281.5	0	7.210734889	5.7884925	5.991938594	6.642900036	6.694939972	8.671603675	6.254050839	9.20745274	10.8820257	6.697408271
MB-7000	97.4	0	7.646813928	6.727235791	6.0223794	7.422012902	6.777106534	9.031815385	5.651519148	9.432312837	10.8414152	7.262843609
MB-7001	102.7	0	8.805740355	6.511921468	6.409281097	9.235921127	7.272190812	8.516305349	6.855433615	9.824895328	10.39877829	7.795795991
MB-7002	57.93333333	0	9.131500929	5.8887437	6.467731636	9.138473639	7.024109847	8.559811444	6.94661649	9.894344554	10.02088594	7.214244908
MB-7004	50.46666667	0	9.808889823	7.579766612	6.189205554	8.858621675	7.011312423	8.196861549	6.739490806	9.267625234	10.16510265	7.732643539
MB-7005	45.33333333	0	7.390130753	5.726145474	6.610147846	8.55565509	6.575904029	8.06178003	7.170360356	9.208430972	10.37533252	7.468395429
MB-7006	109.9333333	0	9.23059958	5.945089057	6.279485488	9.258968994	6.219021514	7.817659084	6.67588549	9.394337792	9.48519715	7.216493852
MB-7010	74.03333333	0	7.049730818	5.938723095	6.301095612	7.802383102	6.596176367	8.55845175	6.614015683	8.873852163	8.712228262	7.216460776
MB-7011	70.06666667	1	7.351695589	5.633965521	5.587004587	7.928521164	7.390443765	8.508225455	6.017752507	8.408599142	9.930282041	7.96249704
MB-7013	46.43333333	0	6.584203952	5.482943922	6.314252832	8.883161341	6.818406068	9.781270929	6.456229495	9.963947749	9.998518586	7.226510215
MB-7015	78.16666667	0	6.960175867	6.143188836	5.838414805	6.956978145	7.659955104	9.520138279	6.730285763	9.595922754	10.8414152	7.532475679
MB-7019	80.73333333	1	8.481158874	5.769171911	6.292407153	7.809064678	6.974396231	8.550620837	7.530317129	9.294824689	9.368818137	7.49751615
MB-7022	85.5	0	8.00401381	5.809119841	6.416474382	7.989651297	7.173644743	8.454346649	6.773278892	9.29376056	9.388395811	7.43761018
MB-7024	70.26666667	0	6.85998445	5.736200712	5.739463555	7.542710281	7.567256407	9.613035617	6.840731699	9.445425203	10.48129861	7.839169776
MB-7026	111.7	1	7.897586504	5.75644533	6.512643284	8.880576609	6.541593589	8.260414487	7.553798197	9.702629103	9.745685521	7.508870092
MB-7028	89.8	0	7.996271402	5.859993515	6.234964991	7.159463407	6.821299565	9.438943438	6.776054364	9.631714177	11.50344301	7.291798887
MB-7029	76.86666667	0	9.720194288	6.831946751	6.566216349	9.465000738	6.946884648	8.717136907	7.229585239	10.02088594	10.45017129	7.813536054
MB-7032	71.46666667	0	7.618851201	6.17105912	6.328127991	8.212150892	6.84274736	8.22434249	6.818343382	9.702629103	11.6283203	7.187211366
MB-7034	75.1	0	6.563193046	5.990328467	6.054793226	6.022619108	7.018745734	8.358205451	6.104755548	8.889111704	10.14803205	7.670692864
MB-7037	86.4	0	7.860912458	5.854055165	6.079025113	8.113765166	6.749292043	8.299968052	6.102398781	8.916596254	10.53037933	7.737389221
MB-7040	71.83333333	0	8.51350796	6.681807912	6.251790273	12.01570215	6.710919805	8.429132684	6.726276953	10.12517844	9.341257377	8.003749515
MB-7041	101.9666667	1	9.55472581	6.796164399	6.287254079	9.244408341	6.802653572	8.293236112	6.947478923	10.09680922	10.0806781	7.353115601
MB-7042	88.5	0	8.454040371	6.082418201	6.225945595	7.391910944	7.443247769	8.558046806	6.987408538	8.575720674	10.64100943	7.692139569
MB-7053	122.1333333	0	8.015040424	5.80071633	6.065052469	8.035026309	6.508610763	9.301967033	6.335084627	9.876033837	11.65499135	7.163793769
MB-7056	117	0	6.517303065	6.008870814	6.15404632	7.126358472	6.87985785	8.867289883	6.33404121	9.373434407	8.423870112	7.224125343
MB-7060	112.6666667	1	8.339225486	6.26251168	6.442751677	8.617280147	7.026242197	8.685780289	6.81414497	8.704466382	12.04651123	7.17403083
MB-7062	95.86666667	0	8.477023247	6.16712928	6.008552524	9.501592824	6.649117262	8.405079922	6.889100342	9.117640098	9.729084609	7.415012004
MB-7063	86.6	0	8.926925061	7.44100515	6.576029776	8.678518159	6.949393673	8.205216547	7.173666881	9.504050084	9.335534721	7.086554365
MB-7065	107.8666667	0	7.048093491	5.606797954	6.084065085	6.601801669	6.90835007	8.671281323	6.003546777	9.866437045	10.76838506	7.444758703
MB-7072	52.33333333	1	7.652642531	5.646196391	5.761141593	7.822977504	7.209130576	9.123058985	6.28814116	9.881115801	8.769599789	7.776880836
MB-7075	111.6333333	0	6.698845119	5.95827069	6.020160572	7.547440942	7.396131977	9.544871463	5.903962801	8.363610367	10.5010092	7.6783708
MB-7076	142.6666667	1	9.080608147	5.435554449	6.507918674	8.182397095	6.299856327	8.648569582	6.554417476	9.587952181	7.408518128	7.114567312
MB-7077	101.2666667	0	8.456724789	6.331937966	6.67659912	8.15897502	6.341754624	8.383264099	7.218912254	9.871190738	10.66792052	7.181475337
MB-7080	91.23333333	0	8.435351589	5.95786744	5.996120014	8.436052659	6.711056269	8.378200568	6.773824209	9.299187065	8.612910986	7.352541715
MB-7083	105.4666667	0	7.936506647	7.372168132	5.792729162	8.268981831	6.67578591	8.852647355	6.490511815	9.223063801	8.308148294	7.908206576
MB-7086	123.5333333	0	6.725213458	6.228606465	6.597671504	8.733871732	6.959389026	8.755945708	6.853900275	8.659109081	9.887791769	7.113886023
MB-7091	110.2666667	0	8.496236187	7.124560595	7.1914345	7.683560446	6.426333991	8.339916426	6.914300998	9.058717086	11.79688542	7.191301416
MB-7093	125.8333333	1	8.40265997	6.58558039	6.976798543	8.916596254	6.140148671	8.661045355	7.259821779	9.616473121	9.877706171	7.017764459
MB-7094	113.3666667	0	6.442429028	5.652154945	6.113879199	8.557096004	7.405816012	10.004732	6.503740196	8.651534037	11.20806268	7.215780846
MB-7095	115.6333333	0	7.322426913	5.539742643	6.165211763	7.179187225	6.992997267	8.603349578	6.488260246	8.720729358	9.381530427	7.361642374
MB-7096	124	0	9.132517866	6.272103949	6.689099107	8.705993958	6.992136305	8.564012227	6.79209653	9.182798537	10.45857273	7.175978116
MB-7097	65.16666667	1	7.943553359	6.539293631	6.034909039	8.717658278	7.347081433	8.919731071	6.5277603	9.619248934	10.8297019	7.053240277
MB-7099	163.1666667	1	7.113106537	6.020220528	5.912542611	6.520964742	7.219457219	8.343027597	6.779938794	8.403968554	9.756288138	7.451344498
MB-7100	156.3333333	1	6.731066912	6.095503042	5.96652848	6.969254734	6.921265854	9.611144065	6.071697553	9.362967141	11.53439953	7.600693424
MB-7101	124.2666667	0	9.824895328	6.49873417	6.201500187	8.878890353	6.465284913	8.404654925	6.229000556	9.88613995	9.685134459	7.338112478
MB-7102	104.1	1	6.776323075	7.130420923	5.874243214	7.308721486	7.117617716	8.848351329	6.031793372	9.550833718	6.768126469	7.817280844
MB-7106	37.5	1	9.62746027	7.300330034	6.686198258	9.480148757	6.140993688	8.412823288	6.696330544	9.933807869	9.980146695	7.206287903
MB-7107	56.93333333	1	7.38833935	5.750852692	5.715682829	7.04685423	7.380267559	8.842130284	6.057000533	9.422677502	11.75251707	7.076155403
MB-7109	117.5333333	0	6.906296645	5.683119613	6.167556225	7.927405729	8.08373846	8.144919873	6.416940035	9.705520108	10.39606206	7.119695494
MB-7112	64.7	1	8.035587531	7.060962306	6.384469426	10.10079568	7.916498642	7.957366961	6.74809288	8.972949841	10.95115111	8.278989683
MB-7113	136.7	1	8.896717806	6.33809155	5.911798674	8.478425387	7.138341745	8.817435378	6.679251431	9.899449381	9.481376941	7.523516897
MB-7116	33.36666667	1	8.012315267	6.133969482	6.024386445	7.019667354	7.389228771	8.315252362	7.136063889	9.633105012	9.786938168	7.012442911
MB-7118	140.5666667	0	8.572880416	6.010981731	6.093856729	8.861953254	6.793349671	9.088617926	6.414142031	9.68080561	7.716491408	7.640392578
MB-7123	137.6666667	0	8.841996963	8.239975595	6.327225149	8.303034329	6.71018672	8.299853572	6.324977139	9.306837319	10.94655569	7.520632578
MB-7124	139.6	0	7.057514105	5.588875303	5.789563435	7.679596596	6.964428439	8.920086567	5.97895438	8.870415524	9.446688734	7.359259854
MB-7128	60.26666667	1	9.122583828	6.252707262	6.55447529	8.662784894	6.913537827	8.963210683	6.668506824	10.54530453	10.73121149	7.029960295
MB-7130	102.9666667	1	6.941530285	5.711376535	5.846569834	7.019246383	7.518983253	10.75754155	6.169968238	8.420543849	10.18018725	7.327879616
MB-7131	134.7333333	0	5.861783483	5.810542625	6.196652302	8.306238205	7.331231599	8.126041697	5.998474046	8.580730354	9.72319596	7.573146647
MB-7132	131.6	0	8.638828787	6.370261854	6.822209841	9.036159953	6.771187239	8.377033092	6.361984895	9.965748096	9.331176453	7.150439951
MB-7133	23.83333333	1	8.009559131	6.095315194	6.653108714	8.488051463	7.523495502	8.911856504	6.819467837	9.470025359	9.015610475	7.148256485
MB-7137	179.8	0	7.88227922	6.569607909	6.259395373	12.30013786	6.407828211	8.852800568	6.827899665	10.15670762	11.05031358	7.114607079
MB-7138	123	1	6.192398702	8.084833713	6.1374867	7.17831762	7.618516563	8.46044446	6.377160226	8.923493836	7.984236271	7.414734851
MB-7140	90.8	1	8.546532887	6.255630077	5.667024478	10.31983034	7.338194146	8.976017199	5.980188535	9.930282041	9.01837398	7.47242153
MB-7141	138.5666667	0	9.145344091	7.667270928	6.225392846	9.084423032	7.030030892	8.662252494	6.58119255	9.744106162	9.239081033	7.397243456
MB-7142	175.9	1	7.657950231	6.05459097	6.260807182	7.826109755	7.3651144	8.500311355	6.785413437	9.561257524	8.98115994	6.966176385
MB-7144	102.6333333	1	7.60736891	5.886955388	5.710079669	12.96641973	7.793457762	10.58023812	6.437719242	9.417913822	13.23086442	7.930644876
MB-7147	168.6	1	6.207162867	5.686454795	6.314537301	6.074249132	7.690296697	9.397366444	6.409854822	9.125519188	9.385006413	7.652055805
MB-7149	44.63333333	1	7.835449298	7.461316466	6.179152087	10.87385021	8.15145985	10.95824654	6.209000471	9.887791769	11.2528206	7.819691789
MB-7150	128.9666667	0	7.815210511	5.949935279	6.228099526	8.354661507	7.706188961	9.228847955	7.063625101	8.481158874	10.07487392	7.770271273
MB-7157	219.6333333	0	7.009990205	5.877056581	5.809963894	7.454005849	7.315714277	9.859581263	5.800990009	9.440591264	9.578638025	7.444265904
MB-7161	121.5333333	0	7.581823586	7.129088287	6.075436521	7.510924963	6.384950007	8.470982155	7.068450706	9.652445734	10.54530453	7.127767996
MB-7162	140.2	0	8.757571736	6.945280775	6.286385212	8.856987001	6.998720793	9.041447196	6.518097243	10.17593569	10.95115111	7.810591345
MB-7163	52.63333333	1	10.17804917	7.875133205	6.15249541	9.482621742	6.443351979	8.903047359	6.562750922	9.399090019	10.42539926	7.208405117
MB-7164	211.4	0	9.820046973	6.306582874	6.170197166	8.448715244	6.793314242	8.772613563	6.252218589	9.640004858	11.50344301	7.283844526
MB-7168	150.5	0	9.866437045	6.574253043	6.433544849	9.140438578	7.02397939	8.420234623	6.76735362	9.223063801	9.565258324	7.560582084
MB-7170	155.4	0	7.247473152	5.776699962	6.4262533	11.28815274	6.453280372	9.335339231	6.101342701	10.07090411	11.75251707	7.127403849
MB-7171	160.4	1	7.80395997	6.274750887	6.163670207	7.936506647	7.224701812	8.373501765	5.925282778	9.312456127	8.387535127	7.388230811
MB-7172	149.3	0	7.795704977	7.617508692	5.996331877	8.672517312	6.58857593	8.565708254	6.481781938	8.729173272	9.482621742	7.522572878
MB-7173	63.53333333	1	8.304967751	6.46335222	6.228650233	8.727621616	7.53409061	8.227022368	6.513159166	8.594527794	9.443070976	7.520023324
MB-7174	140.7666667	0	7.240997406	6.348505666	6.456820642	7.723885622	7.48282736	9.684944759	6.879602075	9.115718684	11.8907851	7.728411562
MB-7176	194.4	1	8.144387543	5.875290216	6.330485695	8.419180871	6.842243163	8.612915629	6.685001914	9.403785329	11.73174365	7.233005751
MB-7181	157.5333333	0	6.226226578	5.9057702	6.188941056	7.509111766	6.661796198	8.265495458	6.217107292	7.999512713	10.95964942	6.832284922
MB-7185	125.0333333	1	6.342212141	6.143730136	5.512735861	6.764797295	6.980983529	8.625367951	5.506992924	9.385006413	8.77765928	7.38753715
MB-7186	4.866666667	0	6.589362217	6.480449102	6.241433734	6.780786329	7.869136819	8.193000599	6.725273123	9.566644837	10.4614736	6.671901824
MB-7189	143.6	1	7.79161569	6.117902544	6.425934625	7.0936013	6.977027321	9.444830031	6.526000947	9.263287649	11.42937784	8.427816222
MB-7193	87.46666667	1	7.316246435	6.350257425	5.957868627	9.796397318	7.611968881	8.800205621	6.400054333	9.025868692	10.10682316	7.546668442
MB-7194	46.66666667	1	6.953343702	5.643061058	5.889493461	9.456524366	7.841320817	8.545550597	5.929580682	9.748659873	10.59244739	7.576656799
MB-7195	80.43333333	1	7.04607268	6.580915618	5.832735785	7.589484023	6.380260321	8.7434406	6.083689111	9.657905394	10.25517511	7.627291555
MB-7197	187.8666667	1	7.219604042	5.883019126	5.973435167	7.170336626	7.291501826	9.338605067	6.136713008	8.817248476	10.05338963	7.705373792
MB-7199	76	1	6.424366973	7.012591848	5.704638369	6.642900036	7.297908244	8.556617918	5.802034415	9.802585693	9.808889823	7.639765838
MB-7200	97.6	1	7.69969648	6.271649381	6.35654056	7.614007844	6.969596079	8.273196908	6.679263055	9.544203668	9.154340403	7.48562865
MB-7212	52.5	1	10.54841106	6.676844175	6.238631829	8.858621675	6.632160735	8.332023775	6.751546945	8.855288174	10.18850413	7.690583158
MB-7216	207.4666667	1	7.783416302	6.041470856	5.899676483	6.128619669	6.994107226	9.362009073	5.939640444	9.683707378	8.460770838	7.453828867
MB-7217	90.4	1	10.99476344	7.985884807	6.836277061	9.365285393	6.704631533	8.540435167	7.557578932	10.73121149	10.06514747	7.353739841
MB-7218	165.4333333	0	8.909625572	7.332363649	6.048987249	7.97652345	6.413396062	8.412926144	6.471972783	9.473790479	10.37021909	7.359274549
MB-7219	165.2	0	9.218785489	7.819437879	6.226765196	8.919217327	6.792907955	8.895466492	6.605518115	9.004626764	10.7609233	7.196733018
MB-7220	183.2	1	6.700314348	6.578797506	6.345162654	7.121438822	6.956812677	8.530614153	6.671819615	9.167556359	9.570582128	7.195453982
MB-7226	53.36666667	1	7.180001103	5.818008275	6.433212429	7.026205939	7.77116315	8.226425892	6.08409327	9.261135772	9.981969736	7.956251001
MB-7229	111.6	1	6.84237763	5.620751741	6.143062305	7.217940953	6.973427913	8.640983744	6.270371523	10.0572131	9.981969736	7.231945892
MB-7230	182.6	0	7.929016872	6.642264648	6.243099935	7.720948932	7.321829262	8.598164966	6.867598035	9.151322168	10.12313607	7.959622835
MB-7231	199.0333333	1	8.112043322	5.316921829	5.927408644	7.617388727	6.360137911	9.358295154	6.225187261	8.804947109	9.262217671	7.619632778
MB-7232	177.6	0	6.863819059	5.672144563	6.268077757	7.253072067	6.670785167	8.04202952	6.472283819	8.970294529	9.727652481	7.088688052
MB-7234	222.2	0	7.565238792	5.61576311	6.561195977	8.836181104	7.946591714	8.364013747	5.923773484	8.282992264	9.721720774	8.243900866
MB-7235	170.8	0	9.523348923	7.719759245	6.105563475	8.490774514	7.46559097	9.134572275	6.330514342	9.7807299	8.733871732	7.447695077
MB-7236	201.4666667	1	7.002785641	5.809907134	5.814341862	6.997613476	6.320617822	9.280473771	5.691383388	9.124575154	9.594480988	7.689223149
MB-7241	171.1	0	7.487321488	6.104063115	6.180447843	10.9641142	6.912531943	8.847791408	6.259701835	9.86477811	10.80622596	7.464995467
MB-7243	148.8	1	7.362900028	7.624210395	6.779308176	7.972179016	6.962869421	8.404633206	7.041528065	9.199190352	10.52167884	7.014374311
MB-7244	184.1666667	0	8.097044899	6.168427276	6.635886295	7.752973028	6.503448096	8.958419409	6.711056075	9.656502345	9.646726907	7.485370211
MB-7249	58.66666667	1	8.865289454	6.82950675	5.911227809	6.883093947	6.399339524	8.732779148	5.621973897	10.14380698	9.906216645	7.407448216
MB-7253	59.96666667	1	6.679434324	5.575049077	6.113150783	9.012862121	6.913999373	8.798905414	6.926620751	9.812163447	10.60509222	7.487978409
MB-7254	192.2	0	9.766704544	6.502032825	6.567238033	9.72319596	7.470792596	8.446998554	6.398068429	10.38547722	10.89900986	7.240896984
MB-7263	164.9666667	1	7.089911641	6.258587199	6.06719714	7.114799152	8.20827606	8.364549655	6.199266675	9.41552891	7.662924276	7.970975397
MB-7266	68.16666667	1	7.00879786	5.647328352	5.843014093	7.168273208	6.460352419	8.365600865	7.329930381	8.235071787	11.9171254	7.742408826
MB-7268	227.4666667	0	9.395520627	6.264721573	6.213168484	8.638072536	7.016565896	8.989781879	6.693289067	9.431167425	11.47310062	7.530116912
MB-7276	185.3333333	0	7.724374836	6.712962754	6.406445533	8.348152189	6.785976832	8.577413675	6.609558059	9.340102817	10.04770408	7.040901269
MB-7277	187.0333333	0	8.249279301	5.732736902	5.786935045	11.75251707	7.07991302	9.104174622	6.604599832	9.76368168	11.48047936	7.370637797
MB-7278	241.3	1	8.361019017	7.860510441	6.769959503	8.105142567	6.175984579	8.799308725	6.752174987	9.932062225	10.88641969	6.901293714
MB-7280	195.5333333	0	9.159409407	8.60992057	6.127631052	8.833713024	7.114021544	8.609097069	6.684500902	9.785402745	10.70945604	7.142995271
MB-7283	28.86666667	1	7.977584376	5.945858328	5.783825788	7.589484023	8.003102667	8.61029888	5.639732435	7.794197462	11.2528206	8.086835017
MB-7284	203	1	8.971176229	6.146515896	6.423099987	8.547228763	7.179245666	8.282258805	6.699547109	9.54821533	8.986533425	7.507774806
MB-7286	158.6333333	1	8.063599427	5.963548474	6.139510087	9.266545191	7.181867606	8.053155117	7.012589066	9.849713388	10.48706723	7.599133044
MB-7287	96.96666667	1	7.16743385	5.73033649	6.054326292	8.074272147	8.095142525	10.40782728	6.654039647	8.378436729	10.2083553	8.399568344
MB-7288	27.06666667	1	7.07555742	5.907525636	6.146858302	8.501000445	6.961166077	8.120203948	7.009379836	9.239081033	9.621948686	7.239970337
MB-7292	78.46666667	1	8.108014435	5.727921446	6.178615002	7.44079759	7.730026805	8.470404495	7.071255033	8.976642102	10.61164808	7.331617593
MB-7293	199.2333333	0	9.537608851	6.796690074	6.572973345	9.327830183	6.429305351	8.200112354	7.371833408	9.438209259	10.2738317	7.01988612
MB-7294	82.73333333	1	6.938009166	5.704964867	6.192398702	11.29401764	7.281481455	9.51850052	6.473228033	8.549355948	10.84530303	7.207691579
MB-7295	196.8666667	0	8.696054228	5.98428069	6.589023306	8.359741797	6.984462838	8.252260086	7.428485845	9.589273408	9.278556113	7.593652024
MB-7296	44.73333333	1	7.656987047	5.772020584	6.09795913	7.501218613	8.697668386	9.393037067	6.900795324	8.851206363	10.28566022	8.351586063
MB-7297	175.9666667	1	7.97652345	6.350892267	5.888597304	6.694502941	7.165923041	9.152836823	7.21248509	9.732011342	9.41552891	7.864946995
MB-7298	86.23333333	1	6.829057013	5.666672097	6.315422206	8.114318634	6.689575989	8.988629373	7.052638888	9.744106162	10.75717183	7.875594001
MB-7299	201.9	1	8.009038859	5.741076029	6.308402514	6.664180568	6.656057181	9.509789199	7.765449257	9.836234979	9.009178063	7.347076527
